# Supplementary material for: Cell Type–Specific Transcriptome Analysis Reveals a Major Role for Zeb1 and miR-200b in Mouse Inner Ear Morphogenesis
Source: PLoS Genet. 2011 Sep 29;7(9):e1002309. doi: 10.1371/journal.pgen.1002309 (PMC3183091; doi:10.1371/journal.pgen.1002309)
Supplement: Table S3 — Deafness genes detected as expressed in the dataset. (XLSX) [file pgen.1002309.s009.xlsx]

## Sheet: Syndromic_and_nonsyndromyc_deaf
geneid	sym	Expressed?	cluster
14051	Espn	56226	Cluster_2
20776	Eya4	14051	Cluster_2
23985	Marveld2	218518	Cluster_2
56226	Myh14	71960	Cluster_2
71960	Otoa	246190	Cluster_2
72088	Otof	83762	Cluster_2
83762	Slc26a4	23985	Cluster_2
140765	Tmie	20776	Cluster_2
218518	Tmprss3	140765	Cluster_2
246190	Ush1c	72088	Cluster_2
13618	Ednrb	13618	Cluster_3
20665	Sox10	20665	Cluster_3
12814	Col11a1	12814	Cluster_4
12824	Col2a1	12824	Cluster_4
12830	Col4a5	12830	Cluster_4
14048	Eya1	14048	Cluster_4
14619	Gjb2	14619	Cluster_4
14623	Gjb6	14623	Cluster_4
20471	Six1	20471	Cluster_4
12810	Coch	12810	Cluster_6
21683	Tecta	21683	Cluster_7
17920	Myo6	17920	Cluster_8
18994	Pou3f4	18994	Cluster_9
20583	Snai2	20583	Cluster_9
11465	Actg1	0	0
22295	Cdh23	0	0
56173	Cldn14	0	0
12828	Col4a3	0	0
12829	Col4a4	0	0
666279	Dspp	0	0
13616	Edn3	0	0
26380	Esrrb	0	0
14233	Foxi1	0	0
14620	Gjb3	0	0
100039343	Gm9797	0	0
16535	Kcnq1	0	0
328789	Lhfpl5	0	0
17910	Myo15	0	0
432516	Myo1a	0	0
667663	Myo3a	0	0
17921	Myo7a	0	0
11994	Pcdh15	0	0
18998	Pou4f3	0	0
13409	Tmc1	0	0
16470	Ush1g	0	0
110789	Vlgr1	0	0
12815	Col11a2	12815	0
12839	Col9a1	12839	0
13367	Diap1	13367	0
16509	Kcne1	16509	0
17342	Mitf	17342	0
17886	Myh9	17886	0
17986	Ndp	17986	0
18505	Pax3	18505	0
19139	Prps1	19139	0
19684	Rdx	19684	0
20475	Six5	20475	0
21453	Tcof1	21453	0
22283	Ush2a	22283	0
22393	Wfs1	22393	0
54722	Dfna5	54722	0
60613	Kcnq4	60613	0
73750	Whrn	73750	0
110253	Triobp	110253	0
140476	Strc	140476	0
229320	Clrn1	229320	0
