# Supplementary material for: Cell Type–Specific Transcriptome Analysis Reveals a Major Role for Zeb1 and miR-200b in Mouse Inner Ear Morphogenesis
Source: PLoS Genet. 2011 Sep 29;7(9):e1002309. doi: 10.1371/journal.pgen.1002309 (PMC3183091; doi:10.1371/journal.pgen.1002309)
Supplement: Table S5 — Cell type–specific markers. (XLSX) [file pgen.1002309.s011.xlsx]

## Sheet: Vb.markers
symbol	Cs_A1	Cs_B1	Cs_C1	Cn_A3	Cn_B3	Cn_C3	Cb_A2	Cb_B2	Cb_C2	Cm_A4	Cm_B4	Cm_C4	Vs_A5	Vs_B5	Vs_C5	Vn_A7	Vn_B7	Vn_C7	Vb_A6	Vb_B6	Vb_C6	Vm_A8	Vm_B8	Vm_C8
SYT15	90.1684	89.2651	85.3544	89.1142	90.8867	95.1455	237.698	120.896	166.171	93.1581	88.1405	88.0534	88.3173	89.0522	91.4869	97.6922	97.92	88.1756	640.41	549.271	584.953	88.101	91.4206	80.8506
GJA5	91.5603	90.7018	95.0161	98.3452	103.192	96.4296	97.8633	103.446	98.5068	98.5965	91.1126	95.4001	91.9768	100.214	110.057	97.8881	100.892	99.4791	241.258	277.806	328.442	94.6874	93.8511	95.1259
ESM1	85.7213	92.2034	88.7415	103.434	83.3199	89.7638	677.547	826.578	845.927	89.3475	90.3483	90.1326	90.945	112.047	85.1328	102.243	94.5349	89.6437	1486.29	1613.45	1503.41	91.1018	94.2846	91.2347
GRP	134.463	137.206	120.58	91.219	93.0812	80.9746	148.332	173.372	183.959	87.4674	94.374	87.6173	162.283	186.554	184.379	89.2985	97.5322	102.012	413.915	423.012	288.675	90.0808	88.9307	103.379
SERPINB9	97.1588	91.7482	90.6445	103.609	93.2408	93.8312	112.964	130.582	166.191	97.0666	101.94	95.5956	93.826	103.267	103.283	99.5816	92.9503	92.5246	276.401	256.432	254.158	103.112	95.1202	106.38

## Sheet: Vn.markers
symbol	Cs_A1	Cs_B1	Cs_C1	Cn_A3	Cn_B3	Cn_C3	Cb_A2	Cb_B2	Cb_C2	Cm_A4	Cm_B4	Cm_C4	Vs_A5	Vs_B5	Vs_C5	Vn_A7	Vn_B7	Vn_C7	Vb_A6	Vb_B6	Vb_C6	Vm_A8	Vm_B8	Vm_C8
COL20A1	140.802	160.916	89.5026	156.318	142.895	148.979	124.504	106.818	95.5105	138.151	137.332	94.1428	154.448	128.133	106.98	438.859	991.781	426.763	160.097	146.987	109.569	133.528	160.519	87.4178
PMP2	93.6278	82.7886	99.677	202.425	85.9131	109.156	92.0634	100.367	95.5265	89.5186	86.1095	92.3213	96.7345	92.1786	94.886	997.857	460.69	1111.17	120.758	104.444	114.028	90.3345	91.4816	95.7536
NRN1	78.6432	88.7472	92.6257	92.6605	104.027	134.982	85.5978	86.0162	86.5532	100.923	102.13	120.55	101.89	87.1305	91.2008	318.391	294.206	473.096	88.0635	95.2572	94.9659	93.6024	91.8108	86.1996
4933402K11RIK	91.5244	96.8667	95.6022	132.034	103.853	96.7741	97.2609	101.809	100.119	92.3957	90.0054	90.6258	98.8848	96.7741	105.84	419.302	265.857	604.062	109.855	101.162	87.8275	90.7562	91.1018	88.0857
RARRES2	111.052	111.006	129.637	419.073	300.642	384.332	109.247	110.476	89.6738	204.14	172.835	193.442	147.437	149.705	179.858	753.353	741.421	633.167	113.512	112.293	112.834	268.026	235.914	271.769

## Sheet: Cb.markers
symbol	Cs_A1	Cs_B1	Cs_C1	Cn_A3	Cn_B3	Cn_C3	Cb_A2	Cb_B2	Cb_C2	Cm_A4	Cm_B4	Cm_C4	Vs_A5	Vs_B5	Vs_C5	Vn_A7	Vn_B7	Vn_C7	Vb_A6	Vb_B6	Vb_C6	Vm_A8	Vm_B8	Vm_C8
NTS	91.2247	92.8304	91.1126	86.4082	89.8	85.1955	152.04	209.928	179.393	87.6443	88.966	96.8703	93.4046	88.0857	90.021	86.8009	95.4252	87.5226	97.72	95.8458	98.1986	89.4316	88.257	95.5155
SLC45A4	356.015	406.557	303.937	261.952	233.948	233.889	110.89	105.158	114.242	222.841	174.052	219.222	310.68	395.748	252.944	183.21	429.235	232.599	229.419	202.716	209.603	200.888	189.36	176.989

## Sheet: Vm.markers
symbol	geneid	Cs_A1	Cs_B1	Cs_C1	Cn_A3	Cn_B3	Cn_C3	Cb_A2	Cb_B2	Cb_C2	Cm_A4	Cm_B4	Cm_C4	Vs_A5	Vs_B5	Vs_C5	Vn_A7	Vn_B7	Vn_C7	Vb_A6	Vb_B6	Vb_C6	Vm_A8	Vm_B8	Vm_C8
ZIC1	22771	80.9746	88.0024	89.2432	114.739	89.1614	136.488	86.8009	95.6073	80.557	273.398	213.194	349.751	112.907	110.132	107.435	188.549	128.359	205.219	97.1509	90.2636	109.518	1708.22	1893	2044.82
CAR3	12350	87.1002	82.599	90.2576	95.4118	86.1731	92.8842	103.312	80.3514	87.0878	176.623	151.371	166.096	99.1417	91.7541	97.1246	95.5807	94.3064	116.005	100.151	106.245	96.295	1327.28	653.253	995.732
CNTN6	53870	115.976	114.917	103.021	166.118	156.532	123.205	113.425	111.792	107.422	147.86	128.255	115.169	120.098	105.863	119.768	147.988	120.417	184.409	124.854	104.454	105.833	644.017	898.209	623.24
LPL	16956	95.3683	97.372	96.3815	132.074	97.4136	108.337	106.738	111.342	126.743	118.374	115.976	118.956	132.012	122.875	114.276	149.985	102.964	140.512	116.698	101.005	155.348	550.57	502.313	698.776
RBP4	19662	102.603	92.9599	97.5226	91.0793	89.8851	90.71	97.3773	93.8569	98.0795	92.9155	90.2799	95.1357	84.7236	96.5802	94.975	95.2572	99.8263	145.996	92.1264	92.9449	95.1767	844.425	461.734	610.901
SLC13A4	243755	103.576	96.723	105.272	111.837	109.814	142.799	138.862	100.237	102.887	164.982	149.955	137.216	114.37	106.169	133.599	158.656	120.184	204.055	94.9898	101.271	91.0007	893.038	628.219	773.988
ITIH2	16425	98.3301	87.8578	88.2783	96.0459	92.0686	93.3443	91.4643	90.9811	97.0666	139.384	105.809	127.846	110.057	93.2954	99.1168	132.866	93.2858	108.224	102.687	93.5143	97.2397	514.439	411.203	541.353
GALNT2	108148	453.998	424.027	445.606	312.216	393.416	364.234	303.448	192.036	273.168	472.932	397.482	479.201	476.715	481.448	456.669	372.414	359.177	418.924	268.281	521.242	308.411	1411.58	1833.91	1503.41
NUPR1	56312	293.899	278.13	282.953	126.475	88.863	100.203	86.8346	91.9907	89.0059	430.831	237.395	285.292	424.69	248.124	349.336	169.268	90.6841	157.122	123.856	84.333	93.3607	1551.19	1101.57	1219.53
COCH	12810	91.8819	101.639	106.42	368.854	128.532	689.189	115.523	93.007	113.203	788.332	1302.26	830.308	218.558	182.498	237.43	627.3	516.009	854.694	146.541	136.119	181.473	2879.5	3376.23	2839.09
RANBP3L	223332	98.1695	94.6746	105.131	112.138	100.821	96.4761	100.002	105.461	114.625	281.653	344.571	278.578	93.694	102.936	95.7185	113.536	118.211	125.64	106.336	101.307	112.563	828.177	764.666	749.009
ASGR1	11889	104.064	107.435	95.764	89.4419	113.891	93.9846	100.011	118.408	96.1889	132.88	101.261	105.165	101.261	104.23	108.101	96.7884	100.61	90.6258	90.1326	109.32	93.9575	363.821	279.401	360.714
RXFP3	239336	92.6416	95.6962	91.1362	138.373	88.7084	206.753	91.2715	98.6477	104.346	192.784	266.095	218.041	89.7421	101.571	113.319	136.626	101.457	132.758	90.8035	116.03	90.4081	646.245	593.72	539.336
AMIGO2	105827	161.83	157.181	151.361	109.983	140.639	125.98	130.844	125.919	161.439	176.678	169.336	192.459	129.502	145.723	158.542	109.09	111.351	125.537	122.715	145.771	164.568	390.459	375.475	424.415
ADRA2A	11551	115.225	127.564	99.3524	111.392	114.978	125.02	147.489	118.633	103.593	195.98	131.769	183.844	117.451	106.79	98.0983	247.707	291.565	338.902	149.785	135.141	127.455	672.685	643.338	1241.15
2810046M22RIK	#N/A	211.401	202.054	199.649	130.002	102.031	113.363	94.087	86.7462	98.1776	666.105	574.265	588.459	210.006	153.312	297.706	99.3743	112.067	162.566	104.143	89.5349	95.5477	1534.59	1260.75	1378.97
TPD52L1	21987	124.182	112.167	132.176	107.903	106.275	126.819	127.502	126.942	176.296	132.407	162.08	135.611	150.708	125.871	155.936	119.6	108.244	155.63	100.849	110.977	130.482	342.079	381.446	319.099
LAMA1	16772	98.6842	91.0404	95.3543	121.42	105.492	94.886	133.384	109.485	125.127	93.2192	94.0621	100.923	100.865	106.458	116.467	91.4782	102.354	98.5598	109.569	103.389	103.099	267.941	239.121	248.369
SPSB4	211949	264.953	269.45	267.35	132.894	129.188	174.993	116.812	112.849	98.8301	290.218	376.035	400.731	340.207	382.44	394.973	144.981	158.736	175.614	97.8518	116.391	116.012	769.496	847.215	717.704
SLC7A11	26570	94.0444	88.838	95.1543	94.077	91.9847	95.5807	97.8419	102.205	103.138	109.569	100.749	113.224	104.579	100.172	99.407	94.7777	96.7192	98.3353	101.205	92.5456	98.5965	266.389	199.542	286.731
SYNPR	72003	95.5627	95.9063	100.538	362.048	249.15	274.149	85.0556	88.6398	88.5294	102.054	164.938	169.575	156.191	120.044	120.973	248.038	304.066	182.498	107.759	108.886	97.625	880.879	893.038	635.631
SALL4	99377	84.3687	87.6173	88.4465	84.996	85.9853	85.6173	89.4236	87.9232	92.4122	101.279	94.1461	102.512	87.9438	88.7472	89.4631	95.2938	84.9323	92.2585	97.4825	85.9131	90.0145	174.132	183.87	221.707
ABCA9	217262	95.7185	96.2023	96.8089	260.609	226.474	222.242	107.572	117.9	107.411	326.367	295.387	307.259	157.715	114.642	100.402	276.717	251.989	257.059	175.847	234.041	110.002	554.081	606.98	551.019
BC064033	208164	84.2814	91.8928	90.582	92.906	89.3695	87.5901	90.0433	90.6258	97.45	106.115	102.836	114.725	91.0793	90.8381	88.3386	87.9232	89.5604	101.44	93.9685	93.3871	86.8009	263.904	193.476	255.003
SLC6A1	232333	96.911	92.8168	109.542	90.0433	93.256	89.9095	107.561	122.338	99.0597	93.5084	100.917	94.1188	97.3418	99.8263	96.4357	127.301	97.4547	121.702	88.3709	117.19	100.681	361.049	210.589	293.326
NELL1	338352	93.7609	96.5349	97.1135	137.097	92.2332	99.1269	91.033	91.4364	90.9252	165.531	146.749	172.796	97.6145	87.931	108.385	91.2405	90.7488	105.285	122.183	101.803	92.8686	339.043	285.577	324.029
CAR14	23831	103.415	102.719	112.362	102.56	93.7346	100.549	112.488	100.86	120.524	177.178	152.029	160.309	87.6815	93.007	97.1588	149.544	94.5222	100.665	95.3501	108.426	104.552	330.961	291.292	364.16
4833405F18RIK	#N/A	160.543	130.81	143.013	154.589	113.46	138.321	81.9032	84.4634	101.957	860.266	902.499	862.088	100.635	103.188	133.667	157.884	124.024	203.026	89.7293	95.6119	128.818	1555.53	1472.76	1543.4
SRPX2	68792	93.3607	90.5991	92.1126	86.8346	90.8089	90.174	98.4731	92.7436	89.9001	104.787	94.2445	106.438	98.0217	87.7933	95.2898	90.1908	97.3126	96.412	100.176	90.4606	97.221	233.697	171.971	233.697
COL6A1	12833	90.6902	88.3988	91.8421	96.5849	89.1696	96.7165	90.8455	91.5244	94.7743	158.656	128.789	142.799	86.3605	88.3988	91.7205	101.265	103.183	104.189	88.5738	98.4978	92.8263	288.482	255.003	268.841
BNC2	242509	92.7871	94.1081	105.786	332.996	145.218	271.126	103.92	91.536	92.3766	167.32	172.989	162.449	130.482	117.173	142.416	221.46	129.709	192.408	91.0695	90.5315	97.3192	533.551	613.128	631.566
NPY1R	18166	90.5991	92.7957	101.323	100.176	93.7002	97.0382	102.836	95.3465	90.1178	102.975	105.379	113.118	95.1455	94.8002	97.2495	99.0804	85.2374	105.423	93.4007	90.8455	92.3166	224.382	180.359	234.255
WIF1	24117	127.955	152.218	206.036	237.651	233.771	331.092	103.299	126.117	129.16	562.264	704.308	726.326	163.635	156.622	157.846	332.846	303.448	554.641	141.292	130.075	134.219	1518.48	1148.28	1393.48
LOC214403	#N/A	93.5026	95.3245	84.9323	88.6025	101.153	95.1767	179.858	214.951	157.201	102.849	95.6439	91.7697	117.821	105.175	91.6138	119.928	94.7566	112.397	170.942	253.367	244.223	491.249	408.948	398.464
GLRB	14658	97.3075	99.2543	103.033	103.763	98.3501	129.721	89.3475	90.678	92.9503	153.057	156.132	177.379	98.3635	105.062	99.5479	105.417	104.316	113.749	91.1362	95.8774	88.4154	356.23	312.343	276.833
COL6A2	12834	102.031	104.875	107.333	103.369	96.1847	102.593	101.319	111.586	102.996	162.921	151.697	146.408	103.942	97.1588	112.93	136.584	107.745	116.248	97.92	107.528	120.305	258.41	250.284	253.629
PLCXD3	239318	106.463	102.342	100.815	99.1559	99.5521	102.42	100.196	93.3328	90.5037	177.379	147.544	165.894	106.402	121.324	119.373	94.5976	90.316	100.329	92.183	90.1398	89.8199	270.573	284.088	275.914
WNT5A	22418	792.526	829.025	804.45	155.699	105.309	163.456	92.2878	104.169	98.2731	594.211	624.544	687.83	330.101	346.99	378.566	151.222	134.532	215.481	304.55	109.469	111.908	1262.55	1307.67	1353.51
PKIB	18768	88.4646	91.9975	89.9976	133.245	136.488	159.507	94.3837	98.0716	94.3214	118.138	117.136	129.471	104.936	91.7302	91.5666	198.644	173.92	216.047	144.904	94.0554	104.033	356.6	328.185	345.104
GABT1	#N/A	91.0962	90.1251	92.9449	91.033	88.8808	93.5255	89.2846	90.892	93.3283	92.5664	96.5441	94.297	87.052	91.0266	93.6278	97.0382	90.2433	93.5084	91.8421	94.8999	92.7214	156.965	178.697	145.921
FAM19A4	#N/A	84.2517	101.989	89.6082	86.4211	77.8493	96.8703	99.7253	88.9307	96.9067	126.525	125.097	162.755	89.4236	88.6604	97.4726	99.7981	94.3933	99.9975	97.3655	85.1719	82.243	292.227	282.953	244.223

## Sheet: Vs.markers
symbol	geneid	Cs_A1	Cs_B1	Cs_C1	Cn_A3	Cn_B3	Cn_C3	Cb_A2	Cb_B2	Cb_C2	Cm_A4	Cm_B4	Cm_C4	Vs_A5	Vs_B5	Vs_C5	Vn_A7	Vn_B7	Vn_C7	Vb_A6	Vb_B6	Vb_C6	Vm_A8	Vm_B8	Vm_C8
LOC381133	#N/A	93.2255	87.6815	90.6963	87.6443	89.2651	97.5173	93.2447	88.6025	89.4882	89.786	88.838	89.3136	1446.35	844.425	838.308	95.1357	100.374	95.2525	102.136	99.3949	99.04	102.159	97.1024	92.7661
NOX3	224480	89.3136	86.1731	92.0634	89.5743	88.3899	94.8383	91.1846	90.8254	90.2199	89.5743	86.9939	90.0145	768.51	716.204	882.957	89.0059	84.2814	85.5303	89.5186	89.6082	81.8518	96.8831	85.1955	89.1962
ENPEP	13809	265.685	261.84	260.397	95.5748	90.1102	92.3569	84.9785	90.183	103.738	213.821	170.694	190.131	1310.71	1457.92	1393.48	113.579	93.6682	116.159	88.6691	106.938	90.1514	233.192	254.609	268.781
1110017D15RIK	73721	142.747	126.491	112.355	104.508	109.549	118.496	143.269	116.673	109.469	110.117	122.715	122.017	808.471	687.597	695.705	106.207	127.492	125.484	140.182	107.321	113.052	107.358	113.622	119.466
MEIS2	17536	149.53	165.854	151.507	133.254	196.551	143.546	154.126	107.776	154.348	95.3411	92.9326	93.6278	906.05	1118.25	1475.57	103.374	137.145	111.981	121.17	107.81	132.228	103.132	109.062	120.836
GM414	229389	501.806	674.627	843.437	99.7186	100.729	119.033	89.1888	97.1479	91.3066	91.4916	96.4296	97.5041	3800.61	3678.71	4378.41	150.29	90.9373	102.603	90.3769	110.603	96.8002	161.676	108.267	133.824
CIB3	234421	91.3028	90.7416	87.8578	95.9762	83.7883	83.4143	94.7743	83.4143	92.3338	92.3512	83.2171	80.3514	1118.25	493.29	454.879	90.945	93.8014	89.8128	96.1013	101.446	89.1142	100.803	93.7114	107.67
CABP2	29866	191.205	89.3387	97.8518	95.1843	87.5348	86.527	93.0859	88.838	86.3605	86.7032	87.1956	92.2332	1538.69	1109.53	799.722	91.9352	97.2397	123.963	91.8507	101.403	89.9095	94.6371	91.3935	98.3169
LOC100048295	100048295	106.603	108.988	117.508	93.658	84.4342	84.752	92.0316	93.7467	102.068	89.5099	88.101	88.5541	483.64	617.376	1051.59	91.6568	96.7741	105.891	97.7382	92.4437	96.412	92.7318	102.644	100.422
ESRRB	#N/A	114.647	146.736	142.574	93.6855	95.8306	85.1328	92.9822	91.5194	96.6819	92.1871	90.3045	97.3655	575.28	984.861	678.224	97.5362	91.5666	132.243	103.63	102.576	94.2679	93.2732	93.9133	107.385
1700026D08RIK	#N/A	100.815	96.3589	91.7482	90.9588	87.1656	86.942	88.7343	87.7418	89.6171	91.1184	91.9451	89.1332	475.925	405.779	359.989	99.9457	92.8263	100.695	95.2645	92.9994	88.1839	90.8538	95.6439	83.8598
9930021D14RIK	319259	294.541	259.84	266.893	96.3815	109.926	152.79	112.2	104.557	156.151	116.232	122.092	111.309	1225.25	1043.27	1137.39	131.71	103.733	176.368	125.709	114.093	122.203	242.286	220.796	194.515
VIT	74199	92.7538	87.6542	97.9674	167.49	95.5046	94.8496	89.6646	95.733	109.229	125.251	98.5965	100.066	673.312	557.398	886.971	83.2171	95.1149	86.8258	93.1914	101.799	105.849	153.89	113.46	147.194
ALDH1A1	11668	163.438	200.588	225.661	100.485	95.8189	99.1736	98.0256	102.23	105.353	512.154	237.508	528.397	1675.81	1958.04	2215.58	101.198	99.4742	104.389	95.745	115.232	87.7933	191.691	147.425	154.886
4930504H06RIK	75040	136.774	118.608	129.249	97.0605	91.8009	93.4007	99.1204	100.917	112.483	94.2046	91.3423	91.9288	433.634	441.38	479.621	100.641	91.9352	97.3039	103.273	99.4705	96.5553	98.1745	98.3635	94.1683
LOC626152	626152	202.518	264.015	155.166	103.587	88.1405	88.7472	95.7978	98.8705	90.1457	93.6124	95.1543	94.6223	988.787	1125.77	822.976	89.3879	92.2521	90.2799	93.7715	99.1085	91.6568	98.0929	91.1787	92.0451
VNN1	22361	91.1426	94.7193	97.9521	93.236	84.5503	83.0503	89.1813	87.3061	87.8275	91.0589	85.2374	89.1813	397.698	487.592	642.754	87.3766	84.0125	114.458	97.6444	88.257	87.3629	121.281	115.111	129.809
MRG1	#N/A	100.281	102.087	102.897	100.209	114.294	107.861	106.554	95.4693	108.83	92.5708	90.7773	89.9697	345.851	359.098	416.978	90.9588	100.502	98.2414	107.491	94.0973	105.702	92.4318	95.8231	96.5138
DYNLRB2	75465	199.759	154.308	155.596	87.9682	88.0403	92.1786	83.634	102.484	95.2898	85.9668	95.9995	91.0642	649.043	623.433	597.936	99.4568	92.3273	112.256	89.5255	105.309	95.4779	114.575	107.848	109.299
HOPX	74318	93.694	91.4206	98.9478	88.2368	94.0506	91.1481	97.749	104.257	92.7214	89.6082	96.1657	94.7656	398.375	362.381	340.929	106.972	107.224	116.859	99.7186	99.7253	104.656	100.181	92.8686	100.358
KRT23	94179	135.505	142.938	136.806	109.333	105.205	116.621	95.4252	89.2719	99.9253	95.9716	95.2414	82.8616	416.85	452.8	534.767	87.2613	100.695	107.661	91.9043	88.2459	94.4202	86.3793	99.3785	88.7472
CHRNA4	11438	163.346	153.432	160.155	116.821	126.352	147.525	96.061	102.388	100.849	108.522	148.5	114.363	475.765	514.259	752.326	96.6943	119.38	102.56	98.1257	94.7743	89.4631	105.698	108.595	153.474
GM106	226866	112.601	123.73	130.656	121.495	101.468	144.825	100.308	86.1445	92.0451	104.684	192.317	128.286	818.571	886.971	1042.06	285.78	176.766	171.746	121.215	103.299	97.5994	103.162	117.813	115.713
GPX3	14778	179.336	138.685	143.429	94.2679	92.6133	110.002	136.185	125.02	146.126	100.088	97.4825	103.44	727.085	596.981	724.5	128.255	127.367	122.648	139.656	115.483	107.725	129.314	119.317	208.996
3100002J23RIK	75429	162.388	99.435	107.776	91.2837	83.5481	87.572	83.5111	91.8723	104.215	85.4236	90.3903	94.7091	845.316	465.548	457.918	84.4634	94.9122	104.842	88.9895	96.4412	93.9685	89.3934	94.2046	99.9078
FNDC7	320181	108.492	93.4571	103.799	98.8584	88.0737	84.2517	95.8812	101.453	95.6787	84.9147	86.9056	91.2892	365.412	305.866	366.729	88.9579	89.3136	92.1504	98.7773	96.6614	92.6548	92.4739	91.3194	102.942
CRTAC1	72832	113.919	191.427	151.109	101.111	93.7559	97.8573	89.1614	101.055	99.1828	93.2305	93.355	103.132	507.458	598.709	673.679	91.2307	93.427	112.563	84.9323	90.1457	89.2651	96.625	83.9752	95.3631
CAR12	76459	202.813	190.915	173.204	106.414	108.332	95.758	98.3949	92.0721	100.508	103.726	107.264	101.215	580.34	532.372	519.599	112.472	111.514	97.9475	107.445	121.391	93.3961	100.209	100.958	102.159
PCDH20	219257	127.609	114.582	129.568	91.0266	96.8184	89.5434	87.6939	89.471	89.2538	85.9287	90.7158	85.4703	421.536	390.756	467.838	145.203	146.669	153.261	90.4666	94.886	88.9982	86.9939	85.5448	91.2405
LOC100045502	100045502	129.172	131.36	144.071	99.722	84.8337	87.7789	123.939	91.8223	91.6507	107.837	94.1916	100.903	366.81	447.012	556.627	106.595	89.1142	112.072	88.5822	119.783	100.623	104.217	95.8355	94.37
RSPH1	22092	348.422	298.254	295.969	109.525	113.735	121.562	89.0876	100.078	100.606	114.905	92.0211	123.496	982.774	1239.5	886.233	127.285	144.951	150.754	92.0022	139.656	96.0917	131.073	109.686	126.973
PROM2	#N/A	136.736	118.245	135.779	93.8312	91.8977	91.7697	101.338	102.983	90.7727	96.123	95.9662	89.7464	361.224	369.617	335.946	88.2718	92.8168	89.773	104.8	100.374	98.3169	94.4634	89.9976	89.4882
CHST5	56773	102.111	98.2598	100.913	113.772	107.545	106.684	93.694	95.6897	96.015	84.113	92.8366	86.1095	288.616	285.712	420.873	101.972	118.288	115.343	97.1652	104.96	83.4586	90.5496	85.8921	88.1584
AGR3	403205	273.398	249.037	262.35	88.7343	86.217	85.5619	87.9796	90.1102	91.9352	86.0162	86.1604	82.3944	655.511	661.173	639.402	88.6303	90.9252	95.7781	87.5626	100.979	81.9709	88.6782	85.1499	91.8223
1700009P17RIK	75472	119.176	98.0756	117.976	92.9449	98.0357	96.035	89.1221	89.773	96.2161	93.8511	94.0009	93.1914	349.693	307.139	302.866	90.7727	105.109	119.511	91.3935	100.276	130.358	89.1962	93.592	97.5362
THSD4	207596	259.729	215.144	202.188	96.9353	94.1508	93.551	95.758	94.1999	91.7967	236.002	183.21	201.372	611.145	681.659	610.7	90.1251	94.311	121.391	102.188	92.55	83.4143	264.612	189.844	218.752
SFRP5	54612	98.4257	96.2308	100.088	103.043	104.914	100.979	100.078	112.842	90.0371	89.1962	88.1302	93.7976	260.333	482.174	695.388	104.572	99.6636	106.267	94.0295	112.028	105.867	91.2067	98.0795	97.9617
GFI1	14581	276.112	157.964	135.756	81.3818	88.101	93.0439	101.739	101.331	85.7634	94.3274	97.4903	97.9588	962.554	847.714	633.925	115.361	105.874	109.029	102.313	163.635	88.8465	120.896	107.105	114.21
2310046K01RIK	69698	696.024	465.444	273.775	92.6704	97.0813	104.288	215.017	259.922	366.095	100.033	105.886	95.4693	1555.53	1708.22	1675.81	125.93	94.6223	104.251	659.179	223.254	504.627	103.826	106.896	135.333
S100A1	20193	433.634	309.788	403.3	171.088	134.955	152.014	117.122	105.698	106.916	96.8874	95.7978	102.081	1015.07	961.976	1224.17	178.338	121.35	155.405	98.9478	176.071	118.484	134.488	127.524	129.432
CDON	57810	298.647	276.548	293.326	113.267	138.269	118.616	107.707	107.848	106.803	151.334	143.995	152.553	648.151	671.286	804.829	126.87	113.118	126.275	118.608	108.719	111.084	209.899	213.713	238.814
1700027A23RIK	76420	128.681	114.978	104.088	92.8263	89.7789	89.982	95.4194	109.36	102.05	87.3061	90.0808	90.2799	277.692	307.259	326.87	93.0206	84.996	88.8914	90.951	103.197	96.5732	89.5681	93.7002	90.5114
A330021E22RIK	207686	145.628	114.777	108.107	89.9558	103.846	89.1427	84.8337	94.4874	114.855	116.122	129.799	107.287	375.189	337.87	362.292	94.886	160.4	96.8232	140.893	115.699	100.449	114.259	106.91	113.355
SORBS2	234214	177.287	166.649	171.039	103.862	95.1603	99.3524	139.772	115.936	151.222	109.108	116.581	109.013	418.25	433.734	372.711	119.768	105.6	105.588	129.581	124.604	138.626	112.124	115.5	110.992
PPP2R2B	72930	285.82	256.704	297.706	164.218	201.515	226.517	86.1095	93.1008	92.7764	90.5558	101.236	100.616	625.646	693.328	823.426	148.82	158.682	172.819	94.4329	102.983	92.2705	127.631	122.875	127.285
BRIP1	237911	100.591	177.42	179.492	115.225	113.074	111.478	129.558	99.7488	146.621	92.3569	102.484	104.996	392.792	377.12	445.75	93.6682	123.169	137.232	165.879	94.5919	129.461	90.2521	107.218	147.714
SLC6A14	56774	123.765	158.719	150.911	86.3389	80.0988	85.8921	92.4856	92.9449	98.7169	92.9503	91.3678	86.1604	390.61	360.714	329.406	88.9739	92.156	86.4839	85.0809	90.8164	91.9158	86.1886	93.3829	91.9288
1500005I02RIK	72014	115.72	117.283	100.348	119.212	102.171	98.1776	104.89	106.267	110.454	94.7319	88.9307	86.6707	367.674	308.411	244.949	106.253	92.7093	94.8903	105.492	102.38	101.754	95.5046	91.0695	91.83
CXCL14	57266	92.1002	92.6605	91.5987	92.5613	95.7144	91.3503	93.5729	93.8739	98.4483	87.9557	91.1303	89.3999	350.271	288.55	223.421	96.2023	108.975	92.094	100.214	95.0658	90.2104	98.0578	96.015	93.7559
ZPLD1	239852	140.763	136.652	161.676	270.286	438.503	656.984	99.04	141.667	145.23	780.505	1050.59	1029.37	3272.62	3376.23	3977.47	156.029	275.803	1607.09	96.8475	114.833	88.5419	179.456	266.048	235.869
SCL0003300.1_40	#N/A	121.019	104.89	102.166	114.689	132.633	110.502	111.771	160.503	119.637	85.2756	91.0962	85.6779	374.074	324.953	332.846	98.5857	132.318	116.931	126.402	117.839	127.22	94.7927	87.0755	103.873
KRT7	110310	148.753	145.279	142.975	94.0146	99.452	92.1002	94.6223	94.5391	115.768	83.8598	89.3934	92.0451	324.224	300.171	371.59	85.2557	92.094	93.7385	102.697	86.4082	97.275	86.0612	90.1251	86.0612
GM969	#N/A	99.8223	80.8506	93.7053	91.2405	93.7429	85.1719	93.4046	96.4609	95.3245	86.527	100.49	86.7032	221.773	223.97	204.617	92.0769	91.033	93.7976	93.5831	102.615	96.1013	87.2981	88.8135	96.5945
GPX2	14776	124.222	115.118	108.152	89.1332	91.1928	88.7343	87.9232	95.429	93.8569	91.0126	95.1603	91.4869	255.044	272.243	264.241	84.0786	130.975	93.7114	89.0116	104.954	96.8275	81.2266	89.5743	96.3589
PAX2	18504	192.094	180.018	142.309	118.956	91.0069	91.3584	94.1641	102.21	89.9478	89.6367	92.5862	97.6796	447.266	404.685	373.52	88.8808	96.8275	90.8035	97.7697	100.203	89.9478	92.0634	89.8337	98.354
GREM1	23892	112.756	118.973	91.5828	103.179	110.432	91.6138	108.481	109.013	105.786	108.719	149.408	104.542	290.011	459.541	833.554	114.956	104.356	98.7265	93.355	90.1251	110.225	107.599	95.9496	104.394
LTBP1	268977	171.324	155.48	157.99	105.114	104.626	101.906	96.5732	103.891	112.527	135.659	132.063	145.41	422.843	329.343	328.95	148.916	101.966	124.738	123.384	121.815	105.6	165.773	141.16	167.381
ACBD7	78245	129.958	111.471	97.3856	94.2734	95.5627	82.7249	88.4977	89.6961	99.3524	80.9746	89.1614	84.9147	246.844	265.167	249.959	85.5978	91.5603	94.3634	87.2848	93.0439	92.6416	90.7838	86.7032	84.6383
ADCY2	210044	133.209	134.87	126.247	106.574	95.4001	111.889	95.0475	101.739	89.2719	128.964	134.914	134.109	255.101	291.488	300.878	115.331	114.943	104.199	94.081	94.6659	84.4634	120.53	119.869	120.229
MLF1	17349	277.589	226.426	126.412	157.046	125.529	130.656	164.804	131.85	125.411	177.442	141.553	116.195	717.416	797.407	524.845	164.749	131.802	141.657	146.347	136.051	126.229	142.799	139.827	130.892
1700003M02RIK	69329	120.663	105.243	96.0671	92.119	88.4646	91.1426	93.5565	93.5084	92.8414	93.7559	91.1714	91.5564	268.026	402.291	227.618	86.0913	92.3166	96.4609	87.2613	97.9955	86.1445	88.1128	92.3957	92.7712
WNT3	22415	103.563	95.2989	85.1499	103.052	86.4491	99.9216	96.4998	86.9538	85.7023	92.6196	89.3302	90.1606	221.539	365.412	386.021	92.3338	91.3028	95.7144	99.1736	117.482	104.095	86.8893	89.1614	83.5838
GM1060	381738	139.708	127.597	101.578	100.47	102.65	107.785	93.4969	105.719	127.312	98.2022	105.346	92.6548	370.612	321.507	262.825	98.2898	113.838	102.434	107.733	89.471	88.8808	99.6409	99.4114	109.199
DNAHC5	110082	90.2736	93.2447	91.8723	92.4539	96.5304	96.2678	99.0647	104.215	101.392	99.2501	90.7226	99.1559	301.253	225.7	194.054	90.951	100.872	86.1445	102.37	99.5755	101.307	92.2108	92.2473	97.45
DLK2	106565	227.319	138.212	127.111	146.669	117.081	107.214	102.75	109.575	105.828	102.988	104.1	101.271	656.694	559.85	422.475	94.1081	103.666	109.6	109.787	123.897	114.344	156.083	103.891	102.877
BSND	140475	106.353	96.7345	90.5315	93.3387	88.4558	90.2104	98.263	99.1474	88.6025	90.8035	92.4021	92.4697	196.826	347.3	281.218	95.991	99.9299	106.1	102.504	88.6398	94.9456	91.1072	89.9221	86.9782
USH1C	72088	443.762	343.968	319.661	98.9784	94.8496	90.5869	91.8977	92.4479	103.072	82.243	87.3856	92.2108	1210.13	902.499	808.471	93.3685	94.8496	100.688	113.058	94.216	101.13	97.0813	100.755	91.8108
GM88	224813	232.158	158.981	127.177	117.088	114.896	117.758	108.451	102.644	99.8954	143.606	139.908	138.104	670.306	755.556	419.423	125.431	148.348	109.881	99.2787	117.61	98.263	225.766	171.992	157.602
TEKT1	21689	139.694	129.088	149.737	92.8168	94.4039	88.6782	94.3494	96.8002	94.5284	93.4744	96.1456	95.0422	283.07	316.477	269.978	89.5186	92.0099	91.8421	100.062	96.3556	91.6849	92.0316	92.1714	96.7838
PLXNA4	243743	155.857	139.628	133.702	99.407	108.204	94.7615	94.742	96.2446	103.602	96.2023	94.1683	94.9511	286.731	288.063	278.639	105.135	131.36	100.933	104.914	95.733	109.729	89.9348	95.7826	98.3501
TACR3	21338	96.424	90.235	94.7743	97.1964	93.0888	90.4777	97.0331	88.5188	91.0404	91.219	90.1684	89.7421	276.783	187.871	323.481	93.8372	94.3442	97.2889	97.3317	105.417	90.951	90.1178	92.0721	99.8892
RYA3	#N/A	188.253	126.743	151.424	103.985	85.6545	86.5959	94.4485	82.9096	91.736	81.5137	86.7032	83.6777	334.756	578.828	414.571	83.3648	94.7927	98.4166	94.0656	90.6339	90.945	84.7236	79.4858	89.5255
TTC25	74407	167.224	145.456	139.353	101.082	99.8176	90.3903	84.2211	93.0888	97.8926	94.6124	102.854	95.5748	376.631	390.61	293.478	83.0792	102.544	94.7615	96.5553	93.007	97.2938	110.391	113.563	98.7265
ANPEP	16790	238.128	235.057	191.175	118.855	115.622	115.185	98.9837	104.986	85.0809	191.629	155.491	176.906	416.669	419.423	696.024	131.036	125.361	137.907	104.986	87.1135	94.7193	180.018	189.874	180.812
GALNT3	14425	176.127	174.323	184.356	105.581	140.219	130.892	95.6715	97.2938	99.2025	94.5605	91.266	83.2739	385.792	333.664	320.931	169.701	113.772	148.871	95.5355	92.144	91.4816	98.6601	100.984	95.7781
CD164L2	69655	157.216	107.798	109.103	88.5738	88.2459	90.3548	100.433	92.0022	95.9063	90.951	81.8518	86.527	346.555	329.406	272.289	88.257	85.9668	87.0385	88.8465	94.5152	84.5503	88.9895	88.838	91.7113
SLC17A8	216227	117.412	96.6985	106.433	174.389	147.94	125.097	94.9456	100.209	96.0736	106.444	96.0459	91.5297	362.233	366.596	300.585	81.6506	90.4221	94.6587	89.4572	98.2948	91.1928	88.7472	100.348	96.63
LRTM2	211187	156.238	114.451	106.689	112.535	95.0373	126.881	128.62	245.016	85.447	95.2898	93.1714	84.113	534.122	482.592	419.302	93.9133	107.121	99.9015	91.6849	94.5096	107.149	174.242	144.73	201.961
KRT18	16668	2395.57	2221.24	1454.77	109.492	92.9651	90.678	99.8716	112.668	105.205	96.9699	100.354	100.176	4601.16	4084.24	4072.38	142.999	101.247	142.549	96.6719	133.372	98.0217	452.162	385.493	454.879
CAPSL	75568	223.545	171.764	222.168	87.2613	84.2211	86.5532	87.6173	88.8135	88.0024	86.8491	79.1423	87.839	417.883	406.557	375.059	96.416	90.917	101.013	91.83	95.4924	89.7638	99.4242	90.7838	94.4259
5330432B20RIK	99937	158.16	108.918	97.9108	102.366	89.6311	92.6647	90.7488	91.8928	95.8404	90.4741	94.3174	92.0267	439.65	374.651	264.995	91.4504	96.0112	92.0211	96.6406	96.2678	94.8903	88.863	95.227	91.7751
XIRP2	241431	119.017	98.0929	90.9588	90.3427	90.1251	88.1128	89.9169	97.1876	98.182	84.6997	88.0737	87.0878	305.943	236.105	199.11	84.8337	90.0286	89.4882	95.0161	96.1381	90.174	91.6507	86.3793	90.7158
THSD7B	210417	138.598	121.374	107.653	89.3816	94.8214	100.955	93.3122	98.4022	93.2677	99.5162	96.4761	92.7957	260.558	339.72	231.788	89.6646	97.8573	94.7867	96.4196	89.6646	92.9201	89.5995	103.411	101.198
ST8SIA2	20450	172.061	166.096	158.021	132.452	146.244	113.715	91.3728	96.7313	106.158	143.718	140.738	166.666	287.736	314.81	299.729	98.4934	98.8634	98.8889	87.9926	96.2161	91.9451	110.68	150.21	157.432
PYY	217212	88.7188	97.3039	96.8619	79.7439	85.6367	85.1499	94.7615	98.2143	90.5759	90.8797	94.0973	89.7789	235.358	172.376	407.535	92.9155	99.4898	95.7185	99.4114	103.129	86.7318	91.7853	92.1604	89.0116
LRRN1	16979	311.299	273.119	432.909	259.664	275.146	422.138	104.199	103.768	112.958	642.225	554.436	522.774	1141.96	1514.2	2060.61	233.73	193.124	248.369	90.2576	103.351	99.0204	684.013	551.019	593.557
LOC383709	#N/A	124.3	99.8658	90.1178	95.3945	88.838	83.7267	93.3685	96.9999	90.316	95.8532	79.7439	81.8518	293.326	236.441	205.965	91.3992	88.7631	92.1604	93.1481	119.482	97.3075	91.4206	91.9451	93.1008
ELMOD1	270162	98.0217	88.9134	91.3066	89.5905	86.7184	89.0304	85.7023	88.7631	96.9789	90.4777	94.7248	94.8999	300.213	226.044	168.632	87.5348	94.7656	93.4007	102.026	89.8337	93.5876	83.8297	98.522	94.4569
SOD3	20657	94.4634	92.4601	96.035	98.3721	105.907	104.996	95.5477	89.0621	98.1629	93.4007	95.5537	96.3236	211.666	189.13	310.296	100.237	106.903	100.787	115.045	94.6992	97.942	90.6445	95.8458	98.6785
OCM	18261	107.091	90.2199	85.2243	95.8458	95.499	82.3944	98.9687	98.3169	105.066	90.7158	96.3698	94.3007	284.632	315.483	174.367	96.0966	99.452	106.757	94.6556	96.8619	92.7871	89.8199	94.9205	93.3685
SLC14A1	108052	109.752	104.714	108.531	88.8465	87.4796	92.144	90.7987	90.6598	97.3236	88.2459	90.892	90.2281	177.521	282.814	297.274	89.9396	90.8035	98.3301	100.324	93.3961	84.5193	87.3944	91.0199	84.333
LOC100047200	100047200	102.101	141.572	135.634	129.413	180.417	153.415	119.17	199.015	170.224	84.1913	84.333	89.7559	384.813	536.528	698.989	129.229	218.006	239.3	133.886	169.401	190.512	90.6385	96.9789	90.8538
WDR16	71860	95.6439	96.3019	90.7727	90.5759	94.7743	85.8003	98.0011	98.1986	85.1719	90.892	86.2494	85.2374	207.812	190.765	170.478	106.538	101.927	89.2538	94.3214	88.5629	89.6238	87.1135	86.5532	92.3726
2810043G22RIK	229146	204.206	144.904	162.566	123.42	124.962	151.222	92.2412	101.865	90.0645	152.111	120.214	196.345	328.442	326.035	413.831	116.335	135.214	126.426	105.417	95.3683	99.8263	173.463	152.459	196.345
LRRC27	76612	150.6	139.879	146.961	100.538	95.3501	99.5926	93.1581	122.08	105.401	99.1085	100.508	95.9385	277.433	246.7	239.486	90.5114	102.23	99.0141	88.8914	111.739	105.205	100.258	102.026	99.162
CHDH	218865	172.04	173.517	146.924	115.615	110.863	104.223	92.0267	99.8308	111.16	97.336	93.8372	92.8569	290.339	272.948	291.613	98.0357	97.7535	108.437	99.6878	103.816	102.983	98.8301	98.1939	95.7826
CYP4V3	102294	201.991	219.751	264.368	104.96	110.922	130.368	142.769	158.501	147.004	141.389	133.083	165.43	414.333	614.919	666.922	153.078	102.609	144.331	118.855	166.48	139.453	149.47	170.006	202.754
EG635702	635702	171.039	138.166	134.049	132.571	104.458	113.919	91.7648	96.6719	99.162	118.478	110.159	124.716	375.368	305.13	267.163	145.608	91.6075	109.632	96.5623	91.1652	91.7034	121.75	109.549	120.121
WFDC12	192200	125.297	123.516	151.187	92.1002	91.5033	91.3066	92.8784	95.6202	99.1685	99.2452	95.5155	93.5201	377.423	234.165	712.042	95.0871	91.4574	93.5777	97.1336	93.9258	87.2981	93.8792	94.2319	104.742
CSPG5	29873	127.379	119.199	116.188	94.9205	105.012	105.012	119.074	98.7169	91.4721	120.081	123.516	112.823	233.423	224.694	300.934	118.577	97.211	94.6223	90.5869	100.324	105.719	145.679	136.458	141.657
KCNE1	16509	97.5766	100.7	102.087	96.3556	91.83	91.8421	97.1288	99.6214	93.3387	94.5713	94.038	87.8699	164.113	157.066	163.671	93.8849	102.946	92.9931	93.7002	93.1993	91.5564	89.9697	92.4078	96.1889
DNAJC5B	66326	88.9982	93.4852	94.4874	97.5226	93.6855	94.0075	98.8301	90.5631	94.3794	96.9553	89.6437	85.6173	214.26	160.346	152.382	87.2287	88.1302	82.8616	99.8954	93.4969	91.4869	88.0024	89.2719	93.3122
OTOF	83762	138.846	92.9559	84.2517	94.704	84.9323	88.475	93.6062	95.7099	92.5862	88.0156	89.805	87.6284	401.377	288.373	211.341	84.8619	87.0067	91.4992	102.249	103.056	98.5171	90.0587	91.4364	90.859
CLDN22	75677	116.78	135.333	135.363	95.1603	96.061	93.3922	103.117	113.549	130.76	96.2637	103.273	101.446	203.557	328.534	370.612	112.751	99.04	103.043	97.758	106.811	111.509	104.542	101.22	103.576
FANK1	66930	127.092	120.291	114.064	90.6725	92.7436	94.3174	112.315	123.336	102.393	89.7464	96.8985	90.3973	263.942	197.242	191.002	87.8578	98.2898	94.311	126.765	95.9063	97.3814	95.7536	98.7362	85.9987
SLC17A6	140919	131.922	137.755	156.191	143.411	103.924	138.636	104.454	102.101	102.65	109.184	109.628	111.812	308.232	234.378	237.575	93.9313	100.522	107.299	109.951	100.038	102.894	96.911	93.82	94.2319
LAMB1-1	16777	2510.68	2257.07	2076.31	3977.47	3875.17	4060.13	2793.63	3221.51	2770.29	2228.57	1958.04	2029.33	880.879	1015.07	809.022	4393.65	4123.96	4037.17	2328.64	2524.35	2290.17	2730.25	2610.22	2494.21
ITPRIPL2	#N/A	293.326	300.439	266.549	292.394	255.558	287.008	230.766	211.666	288.302	345.172	356.345	400.485	112.668	99.6569	100.958	378.293	304.55	396.687	298.524	330.608	297.622	330.683	291.613	238.076
MYO1B	17912	404.328	373.991	447.391	214.38	236.717	280.729	862.604	1119.05	788.709	489.114	454.578	441.234	120.723	122.385	125.772	359.537	321.08	348.943	786.691	754.861	751.706	557.863	537.033	469.92
GPR23	78134	372.274	356.6	523.533	1903.07	2435.7	2441.05	2078.42	1935.37	2631.58	928.949	1435.37	1405.7	199.789	231.164	210.048	2445.33	3054.19	2366.19	1639.04	2510.68	2203.27	882.169	1171.5	1177.84

## Sheet: Cm.markers
symbol	geneid	Cs_A1	Cs_B1	Cs_C1	Cn_A3	Cn_B3	Cn_C3	Cb_A2	Cb_B2	Cb_C2	Cm_A4	Cm_B4	Cm_C4	Vs_A5	Vs_B5	Vs_C5	Vn_A7	Vn_B7	Vn_C7	Vb_A6	Vb_B6	Vb_C6	Vm_A8	Vm_B8	Vm_C8
C130060K24RIK	243407	151.109	136.749	202.754	315.262	98.8665	131.37	151.885	177.521	99.1648	1651.08	1407.44	1400.64	93.8415	99.8716	101.515	86.5959	88.475	87.8699	221.973	238.363	98.5383	115.962	188.113	170.496
NKX6-1	18096	86.6233	84.0125	95.7379	106.487	91.7034	102.936	86.9056	105.272	92.4195	297.345	344.742	329.343	84.4897	89.2651	82.599	96.1325	99.2452	91.3249	96.927	93.1914	87.705	109.32	107.888	104.971
EFEMP1	216616	299.769	233.697	320.823	265.685	135.427	182.106	102.692	120.697	126.342	1765.11	1492.55	1607.09	128.985	106.544	158.671	141.771	128.353	126	84.1913	99.8658	87.1305	667.902	536.528	511.466
GM1140	382217	94.1036	94.2319	98.6018	88.2651	94.6034	103.226	104.384	94.2642	89.5349	225.085	230.822	244.273	85.3726	89.9348	89.7072	97.9844	100.329	94.4329	100.072	93.3922	94.4485	96.5075	97.3279	98.1422
MME	17380	236.07	243.574	258.508	187.21	93.7114	123.22	147.893	118.67	187.29	999.861	756.614	1146.63	296.784	283.07	356.916	114.725	105.135	103.183	103.267	91.5603	95.3137	162.686	143.854	175.68
SCL0001987.1_16	#N/A	154.8	206.256	184.223	141.057	97.5173	112.601	152.091	133.748	143.718	688.119	561.716	974.311	243.425	219.587	278.701	101.894	100.006	103.141	98.2986	87.1831	97.6444	131.696	122.924	136.774
MMP16	17389	230.864	210.704	243.465	284.958	314.122	274.347	95.4739	113.065	106.183	914.026	801.183	864.668	203.255	193.212	163.075	276.401	378.997	296.163	93.996	90.2799	97.3593	402.429	341.342	391.231
LOC100044411	100044411	129.983	105.239	124.854	114.985	100.033	114.078	101.583	91.2347	113.25	654.58	490.743	444.462	85.1499	92.2878	90.3635	96.7452	106.532	88.3899	88.1584	110.311	111.458	224.285	153.494	159.832
CRYM	12971	604.641	696.854	1035.52	762.841	357.105	1057.52	104.494	115.901	190.198	2846.11	3170.37	3720.88	218.171	275.734	241.586	150.417	306.971	285.874	86.7884	123.69	113.241	1305.37	1495.73	1375.66
CDH6	12563	96.9067	97.6385	96.375	309.788	230.914	266.81	95.8458	128.071	91.0843	885.332	642.754	618.723	129.872	90.8035	88.0024	331.18	186.143	339.538	102.115	90.0054	106.395	168.033	154.295	141.735
PCSK2	18549	87.839	94.6124	90.0145	112.549	96.2576	110.454	93.427	97.2073	94.6556	331.606	212.607	271.986	88.966	88.101	89.7293	104.552	104.469	103.749	90.5991	97.5623	92.5613	106.835	104.875	117.517
6720418B01RIK	77892	102.489	91.9451	97.6444	105.833	117.935	109.855	148.275	103.497	154.147	376.731	322.724	336.748	95.9244	96.796	97.5679	125.939	93.3871	122.76	178.914	164.47	125.621	139.908	161.379	120.704
ITLN1	16429	103.076	86.217	93.8148	105.899	93.3122	101.05	88.101	94.2371	88.5822	264.241	266.048	278.31	88.5822	87.8492	88.1584	84.804	86.0913	87.2981	93.2858	88.8914	85.3299	118.855	163.045	143.293
HTR1B	15551	93.9487	121.013	119.311	103.247	86.8629	107.752	88.2459	105.974	98.5485	246.888	226.724	296.523	90.678	96.915	95.3137	144.009	139.932	104.648	105.191	94.4634	107.085	101.803	105.531	106.14
FN1	14268	267.258	310.903	279.401	154.243	101.123	129.348	178.132	190.886	199.946	750.49	550.326	580.619	238.581	352.8	334.898	132.583	108.748	127.997	170.031	192.153	156.777	289.073	237.741	274.347
CDH18	320865	116.501	116.679	161.729	108.325	91.3139	111.863	95.499	93.1076	99.7675	432.909	350.352	405.105	156.566	134.362	132.043	99.0337	88.7277	119.397	86.8756	91.4782	86.5959	221.348	196.017	227.996
EBF2	13592	104.384	101.166	104.064	102.077	105.291	104.281	109.345	117.744	103.91	218.127	193.557	207.487	107.702	106.427	99.6837	108.337	107.725	112.907	107.328	100.791	100.77	128.805	113.863	124.514
GATA2	14461	1441.47	1237.35	1813.25	2000.35	2690.44	2449.47	597.455	740.619	624.996	105.235	94.704	102.007	1342.78	2058.5	2357.09	1577.84	1713.9	2136.31	743.496	877.057	865.174	2060.61	2553.84	2458.17

## Sheet: Cs.markers
symbol	geneid	Cs_A1	Cs_B1	Cs_C1	Cn_A3	Cn_B3	Cn_C3	Cb_A2	Cb_B2	Cb_C2	Cm_A4	Cm_B4	Cm_C4	Vs_A5	Vs_B5	Vs_C5	Vn_A7	Vn_B7	Vn_C7	Vb_A6	Vb_B6	Vb_C6	Vm_A8	Vm_B8	Vm_C8
EPYC	13516	3767.18	3441.6	3214.66	143.113	97.3481	94.7709	98.8392	114.386	98.1524	97.9382	101.018	110.103	145.218	99.0711	106.643	106.38	96.7452	102.001	93.3961	89.0196	90.5991	136.598	137.729	140.468
MATN1	17180	6265.95	5478.26	5397.95	397.349	125.709	149.785	99.7722	113.784	94.1916	117.35	124.309	200.931	400.279	378.186	542.252	129.861	130.28	163.493	86.8258	95.9244	103.263	239.845	263.977	300.642
LOC100046120	100046120	6556.08	6095.47	5478.26	381.793	118.846	158.123	165.026	124.014	127.729	793.577	512.484	565.448	692.824	735.693	492.26	115.868	97.6213	130.879	132.919	100.232	124.193	469.565	308.099	345.762
CLIC6	209195	1174.46	1224.17	1200.66	110.159	89.0385	103.132	92.3828	92.4739	128.996	143.522	104.918	133.128	135.065	133.736	137.332	103.148	92.6837	97.3655	104.316	111.024	94.0554	184.762	179.139	168.949
FOXG1	15228	1459.86	1647.95	1844.23	127.379	124.352	185.105	96.5553	100.494	93.2954	104.593	176.17	160.953	220.206	246.256	234.92	85.2243	89.3211	90.0965	94.1036	82.0551	88.3988	87.506	90.9588	92.8569
PCOLCE2	76477	1376.79	1338.64	1221.21	117.976	98.3584	97.2306	98.5171	98.9437	95.3501	154.474	112.441	143.454	133.184	126.412	122.264	95.1603	98.3169	114.833	97.8881	95.7933	96.8831	209.366	145.628	204.414
NR2E1	21907	605.334	699.777	676.066	98.4978	97.1288	90.6036	99.5926	94.9608	95.5046	89.5519	90.1457	87.2365	91.4574	103.92	97.6723	87.0215	94.2553	99.6124	81.1283	90.1033	102.627	92.6962	91.1928	89.0787
THRB	21834	889.459	732.897	635.055	98.0505	83.634	108.451	82.7249	95.4147	96.6498	151.187	137.061	135.744	123.025	116.83	120.005	91.9705	83.6777	87.3856	95.764	95.5858	84.0125	151.808	117.687	158.823
C130073O12RIK	#N/A	1182.82	1206.39	1581.96	165.448	128.345	131.304	164.113	186.554	277.744	140.789	149.107	142.895	271.073	298.254	280.229	166.081	167.559	134.815	166.215	107.315	178.185	169.934	154.519	156.101
CRABP1	12903	411.642	506.628	487.971	92.0769	86.4989	91.0793	87.7418	97.5579	94.7927	86.9538	87.8915	104.458	85.6545	95.4497	91.1787	90.0881	98.8155	89.8199	92.812	84.9604	87.4178	87.6173	90.0509	86.1445
ITGB6	16420	459.872	480.996	685.766	96.2807	90.7226	91.2527	98.0873	99.0647	98.7218	92.5035	91.1787	88.8542	103.709	111.606	118.56	91.6375	91.1126	87.8492	91.8723	96.4196	90.2521	89.293	88.5629	97.625
CAR9	230099	504.507	440.117	473.37	103.991	99.4948	97.4547	103.497	110.153	114.423	97.5125	105.635	109.53	108.408	108.946	118.756	95.3683	107.208	101.157	110.551	88.4061	100.974	105.309	95.4001	109.251
FVT1	70750	1307.67	1372.02	1459.86	324.953	235.63	296.096	334.898	258.207	372.711	267.036	255.809	390.879	351.618	291.4	376.731	276.783	284.205	382.554	280.915	229.667	345.005	361.407	267.302	384.42
1500015O10RIK	78896	5478.26	5639.51	5090.57	790.921	569.668	688.497	110.59	146.721	106.676	343.079	207.308	364.45	1425.27	1115.27	1555.53	513.398	887.827	823.863	143.16	114.21	104.813	800.778	379.782	674.815
D730046L02RIK	#N/A	1100.14	1061.67	1401.66	95.4032	93.8849	86.466	86.6095	89.786	94.4634	91.5033	87.5808	86.7318	238.043	254.213	338.545	94.5663	90.5183	84.4897	93.6205	86.1445	90.4974	81.3818	83.4586	89.6437
EFHD1	98363	2655.45	2445.33	2907.23	388.731	262.093	391.231	144.904	94.0722	155.699	775.992	587.504	775.992	555.244	579.037	629.159	566.935	470.744	782.968	199.287	141.401	154.8	389.05	321.77	427.199
TSPAN8	216350	2019.19	1696.07	2133	106.384	84.6171	103.816	103.043	101.601	84.7236	88.9227	84.4634	91.5828	566.71	407.625	541.917	93.4373	95.3838	105.985	94.8955	119.249	95.7933	97.5679	92.1504	89.0876
LYPD2	68311	379.961	482.592	457.764	93.6124	90.1606	86.4082	89.2538	94.742	98.2537	97.758	84.8831	94.5919	100.724	91.3194	132.272	86.284	100.158	88.5188	91.9847	95.0422	92.7436	97.7848	92.7957	91.1303
RSPO2	239405	712.042	661.645	727.686	96.8831	79.4858	89.1696	86.7032	81.7682	84.4027	91.4364	86.527	77.8493	236.394	228.106	245.75	92.5989	83.7883	84.1913	94.4485	94.115	85.1041	95.5265	87.2613	85.5619
PAPSS2	23972	777.808	511.232	562.561	105.084	93.1714	101.188	122.13	157.813	154.021	102.512	98.988	116.104	196.345	152.553	172.855	104.609	94.8002	100.549	157.379	134.803	159.967	116.168	110.59	115.27
SLC24A3	94249	530.343	746.298	585.161	92.7957	97.5723	105.641	103.263	89.5681	85.5448	132.074	121.984	146.669	184.496	199.542	206.392	93.7385	110.962	94.7656	95.7418	97.2938	94.3326	184.252	198.183	185.871
GPR64	237175	759.11	691.414	621.946	106.427	103.099	128.586	102.854	107.135	92.1714	114.704	127.76	112.441	99.5203	102.202	94.4329	123.017	99.8954	124.759	97.5413	103.862	98.5068	178.434	242.881	151.68
MSC	17681	281.887	313.638	383.524	89.0059	100.47	103.036	97.3685	90.3635	86.632	103.153	112.722	111.568	103.7	113.023	110.51	90.2032	85.3726	89.8919	101.188	92.4318	91.3992	89.9753	103.141	88.1487
SPOCK1	#N/A	900.79	950.964	965.91	91.2247	90.0587	85.4703	88.1584	95.3631	87.6939	81.7682	93.0947	89.8562	359.901	368.95	279.524	90.3427	95.4497	95.7883	94.3933	85.6545	88.7631	103.283	89.2127	89.5905
ZDHHC14	224454	363.93	406.626	348.379	112.93	106.87	113.232	94.0146	102.936	111.872	96.2161	96.8743	100.555	140.584	129.493	144.16	104.052	110.787	109.426	97.9035	115.278	111.751	95.7379	97.7744	97.9735
FMN	#N/A	300.988	287.562	260.242	83.5111	91.2527	95.1492	90.0286	97.9588	84.6383	94.4992	89.7789	84.9323	105.76	108.371	98.7456	90.9727	89.471	95.1879	92.9155	105.335	86.5532	91.4065	83.941	97.5125
LYPD6B	#N/A	441.234	659.856	600.023	91.9288	110.985	141.436	102.719	99.1378	97.0552	96.1609	123.556	127.837	159.546	184.379	176.026	103.415	92.518	96.0966	90.3548	86.2494	94.1461	111.725	107.967	117.482
2210015K02RIK	#N/A	1150.02	863.454	967.478	138.359	145.608	133.245	120.915	114.807	118.855	167.078	155.071	176.368	362.048	288.969	264.186	189.395	100.381	129.424	159.282	119.13	123.329	181.274	147.261	157.763
4632401N01RIK	#N/A	1117.48	1154.98	1109.53	319.895	443.492	338.273	90.9811	95.8852	91.6244	96.5849	101.91	118.414	356.916	374.514	468.23	175.526	207.45	212.607	110.261	115.837	100.422	117.53	101.666	118.966
SLC35F3	210027	801.525	981.849	1150.69	194.321	150.323	207.725	97.1789	109.108	104.669	146.736	235.358	252.718	247.812	339.292	233.222	104.494	126.448	100.815	87.0755	101.834	95.9662	195.516	237.651	232.705
IGF1	16000	2082.36	2139.56	1720.62	192.545	115.713	136.319	279.887	220.119	337.379	305.278	184.132	291.17	728.541	589.599	705.327	188.434	106.607	221.737	271.769	261.952	253.182	542.716	398.375	509.451
SPINK5	72432	367.127	242.325	273.6	88.3793	83.8854	88.2718	81.7682	82.9896	84.113	83.0792	84.6383	82.0551	83.5481	84.0786	93.3607	86.0162	87.6542	88.9388	85.9853	103.132	87.6626	93.8739	85.7394	86.2494
LOC100046608	100046608	943.889	1119.05	1156.75	324.389	278.31	263.327	282.136	231.164	328.786	340.929	305.278	402.044	341.885	372.164	386.264	356.015	315.636	292.994	268.572	352.948	243.759	348.865	384.709	356.092
LMO3	109593	283.7	258.314	421.78	96.9648	108.101	101.828	91.9705	93.7651	95.9496	99.7123	92.3726	91.865	111.315	99.1474	108.032	95.2859	93.1872	92.5989	91.6507	99.6977	92.1936	97.1075	95.917	102.97
ANO1	#N/A	565.24	475.311	577.536	91.7149	112.466	114.124	101	100.038	92.2212	99.6516	92.0846	101.822	144.965	211.976	153.835	136.433	133.195	151.371	88.1955	91.6507	92.0846	100.072	107.677	110.266
ABCG5	27409	244.986	329.283	312.413	85.315	95.3356	88.5188	89.4572	104.89	109.6	87.451	102.415	94.9407	95.8404	94.9898	97.8679	91.4916	94.3007	91.5406	107.872	94.9851	101.208	98.1422	99.9399	98.2948
GALM	319625	434.631	534.767	440.243	119.577	100.903	124.525	111.059	114.406	175.784	108.852	115.22	104.886	170.512	195.943	177.018	95.4147	97.4087	114.609	95.991	89.2985	140.687	104.064	107.194	114.848
ISL2	104360	350.352	463.514	359.901	95.0793	101.927	105.291	94.5824	92.1126	109.575	97.0605	92.0721	96.8781	100.017	103.652	100.281	99.607	98.1776	100.096	94.742	159.121	96.3556	88.0156	84.8619	86.1886
NPTX2	53324	358.386	335.872	323.27	116.589	102.745	110.484	108.652	95.0552	90.5114	94.4389	88.1487	94.6371	123.269	148.09	112.047	113.957	101.261	102.86	93.6472	94.2846	95.9206	94.8999	95.5355	93.1581
8430421H08RIK	#N/A	1909.58	1779.34	2136.31	265.383	287.261	281.035	258.543	241.855	298.187	464.313	411.502	610.407	600.562	773.663	823.863	236.351	246.931	373.206	442.536	277.433	469.565	366.729	477.192	668.612
D230005E09RIK	#N/A	552.354	635.338	644.017	136.144	174.957	130.013	135.087	104.1	190.824	233.948	192.874	218.832	262.717	195.583	147.302	145.527	139.453	135.333	95.9612	257.641	188.027	220.607	215.299	162.784
B430201A12RIK	329739	1217.65	1163.4	1326.38	206.726	171.324	253.576	540.283	434.631	477.894	381.793	339.626	373.318	352.324	347.905	330.961	241.005	199.897	226.638	554.889	387.062	488.843	391.112	328.604	404.685
9630031F12RIK	58227	267.54	255.225	275.397	99.0963	91.3678	96.8781	93.2629	85.9987	90.021	100.203	97.6763	91.4364	127.156	109.13	117.802	95.1202	104.1	84.4634	97.2397	92.7478	99.7675	89.7464	93.1208	94.216
PAPPA2	23850	258.913	217.018	220.971	102.28	96.1054	93.7114	99.6409	96.1768	99.1559	101.914	94.9703	95.9762	93.1581	98.5652	102.915	98.7961	96.8475	89.5743	106.26	102.735	98.9063	95.9063	95.304	109.499
MYO5B	17919	367.732	357.44	389.147	97.931	92.156	111.14	88.0403	90.5558	89.8396	91.2972	108.451	100.227	181.64	174.756	178.675	90.3903	91.3249	93.4103	92.1989	87.3856	83.7267	86.4839	90.859	88.7188
MCTP1	78771	212.674	220.071	243.056	99.0754	104.918	106.568	86.466	88.7343	102.777	94.3991	84.0786	87.6542	103.542	102.587	98.7218	91.9907	106.916	96.1277	108.194	98.9591	95.3838	94.3064	92.4786	89.7464
MUC15	269328	339.803	296.523	354.582	89.8919	83.3648	87.5226	100.427	91.4065	100.146	87.2499	91.7799	92.4976	151.302	105.664	139.96	94.2605	91.0525	90.6339	84.5899	86.7666	80.3514	92.294	89.786	87.3766
AI118078	244886	250.002	411.983	384.614	103.211	99.9623	108.213	99.5064	95.304	97.821	95.7418	105.98	107.474	110.11	127.729	126.903	94.9511	96.273	100.244	95.9299	100.088	99.8094	88.6691	101.625	106.095
AW120700	#N/A	1301.01	1435.37	1430	122.839	95.9762	118.982	81.3818	90.5037	99.0087	98.103	117.199	106.228	457.163	666.468	464.123	93.1299	92.3462	96.9011	84.2814	99.7317	90.6902	100.158	107.792	105.658
CYP26B1	232174	261.481	296.096	327.917	91.2581	91.0793	86.3793	98.4022	87.0385	93.1813	97.8679	94.5349	87.0385	107.168	104.008	109.049	83.8297	94.1916	96.4998	112.303	115.868	120.704	131.054	111.168	136.609
TGFB2	21808	2695.74	2506.2	3170.37	399.109	349.103	505.889	504.627	647.275	572.874	716.5	740.619	870.416	1311.7	1219.53	1234.84	392.992	605.525	649.821	956.567	722.502	743.227	736.725	707.44	812.143
2610304F08RIK	#N/A	1087.1	983.338	1228.07	107.72	85.0809	90.7158	107.91	94.8741	95.1767	158.106	130.401	157.397	321.967	364.673	518.591	92.3906	88.101	106.144	82.7249	91.7034	86.0425	327.445	263.638	327.735
TECTA	21683	3899.34	3065.07	4046.96	114.655	95.006	86.5652	95.5582	100.797	91.7424	92.2585	89.3637	94.7248	1629.47	1190.11	1313.99	86.632	103.222	93.1714	100.494	96.2881	93.0206	87.4796	89.3136	96.2489
SLC12A2	20496	3780.47	3499.25	4333.16	1369.08	1295.68	1336.43	711.147	638.318	735.46	1118.25	1107.65	981.513	1337.59	1329.29	1054.2	1336.43	1341.74	1224.17	610.7	656.446	604.062	1717.93	1663.25	1866.31
SNAP91	20616	290.146	307.599	257.766	101.176	93.1662	101.877	90.5315	96.6614	99.9887	110.454	116.598	108.605	133.994	137.587	132.146	93.7922	96.9748	100.253	97.7744	95.5684	96.7598	96.9553	94.7287	96.988
1700040D17RIK	76602	198.335	218.244	200.108	88.6398	89.4236	94.4874	92.7818	91.1072	93.1153	88.9388	95.2572	93.8909	92.6416	108.049	103.403	94.4669	106.183	96.5491	93.9076	91.1928	91.5987	95.7692	90.295	98.3721
GPR64, GPCR	#N/A	398.787	401.155	236.441	92.294	86.3389	93.8792	83.3199	89.5349	88.1756	88.8292	101.285	94.7368	101.171	100.221	88.838	91.6723	94.289	85.315	87.6173	89.5026	80.557	115.324	129.18	105.498
GATA3	14462	186.201	205.965	346.9	93.8792	92.5613	95.3501	97.5082	101.94	99.5881	88.7558	95.4497	90.8797	88.5951	88.1302	88.0156	96.8619	85.1719	93.7053	96.7926	90.7838	90.9252	91.7482	100.538	92.6704
BC062650	#N/A	298.316	273.667	233.023	94.6371	97.4227	88.2459	99.7362	91.736	90.8867	98.0536	101.096	97.5883	103.51	121.192	128.858	95.222	95.6715	86.9538	91.8882	100.066	94.937	93.8617	93.3011	88.3793
PKP4	227937	1628.3	1574.54	1261.54	254.672	252.849	182.212	582.751	621.123	524.845	319.815	302.085	258.41	708.49	704.707	569.517	203.83	180.475	194.763	682.042	663.241	560.649	490.476	413.184	357.5
UCHL1	22223	353.839	425.098	347.799	156.566	123.161	190.85	136.488	129.646	113.617	103.485	145.013	132.519	131.036	145.956	170.672	120.955	111.403	101.77	134.517	198.441	129.229	107.121	100.286	100.508
C030027H14RIK	77465	417.649	477.894	368.057	175.458	193.773	210.413	147.314	184.189	156.578	96.6614	101.473	102.739	172.989	167.006	168.971	158.077	149.358	174.488	135.226	152.177	130.548	96.9837	94.1683	99.6837
RABGAP1L	29809	368.244	317.33	377.512	110.948	121.554	134.637	112.152	141.803	119.876	152.823	131.134	141.263	137.921	173.434	153.773	116.713	114.739	119.138	181.423	132.51	133.291	119.276	130.945	159.753
PLA2G4A	18783	233.423	234.762	310.903	127.651	114.599	115.431	94.0009	107.129	101.822	108.698	96.723	114.299	118.662	128.657	133.465	124.202	112.334	97.2073	103.568	100.766	109.734	109.99	111.179	131.71
SLC44A4	70129	215.641	296.163	261.724	87.705	95.8355	87.2099	100.017	107.824	90.9668	109.151	95.1985	98.2071	113.729	107.116	125.037	93.9014	100.298	93.7002	110.496	102.823	109.339	94.8383	87.88	86.9276
CDH4	12561	646.637	772.141	538.562	110.236	104.015	116.268	101.123	99.7362	117.071	103.112	102.593	97.3236	292.918	312.762	209.366	91.5828	98.522	98.8584	99.5521	100.051	96.1184	90.892	97.9382	92.3957
ATP6V1B1	110935	259.512	213.856	207.308	114.558	104.765	98.5598	107.385	102.975	98.6534	91.247	95.6897	97.3926	105.353	91.0589	120.723	95.2615	98.7362	88.7343	104.752	95.6333	103.206	102.576	103.733	98.621
RHPN2	52428	1448.02	1228.07	1348.6	100.128	116.614	111.112	113.501	152.774	116.883	126.703	105.335	145.809	616.101	647.275	717.985	111.914	114.748	101.251	106.795	87.451	120.428	103.222	104.115	136.539
5830411O09RIK	#N/A	279.716	302.416	276.717	103.962	116.581	102.303	91.865	127.447	92.0267	102.299	125.548	117.958	161.83	117.68	112.952	103.799	90.9811	107.924	111.427	112.886	100.319	120.037	111.962	112.152
GALNT7	108150	654.166	611.9	544.954	152.382	147.733	128.206	152.324	216.172	149.47	145.395	138.166	139.918	296.668	320.664	312.46	166.278	113.337	118.913	128.56	147.162	168.735	207.402	185.188	203.657
RNASE1	19752	1029.37	642.754	873.452	92.5456	90.3548	90.3483	92.4078	95.4546	88.2232	91.033	88.6107	94.4095	378.777	211.156	375.579	97.1024	89.4495	96.0736	123.897	97.7089	91.4721	93.3737	97.5275	91.3584
SOBP	109205	559.652	614.196	586.84	124.534	105.335	107.075	90.2104	101.544	95.6897	278.351	278.509	309.942	330.854	319.099	273.334	108.481	114.237	119.387	105.407	86.7884	103.656	299.66	275.568	256.122
ISL1	16392	1383.85	1411.58	1587.5	183.238	164.098	250.284	92.3213	97.9108	98.8062	128.182	244.328	178.059	588.251	828.177	738.454	91.7799	97.184	115.27	99.7441	94.2924	103.356	104.508	92.0567	92.9709
TMEM132C	208213	1820.22	1557.06	1509.24	145.709	97.3418	168.018	101.625	92.2585	90.6725	737.118	669.188	664.529	684.761	628.548	909.875	105.863	100.606	146.813	86.394	105.052	100.343	681.322	638.96	576.822
2700084L06RIK	#N/A	699.51	1139.77	917.361	318.696	422.595	382.313	261.381	302.284	349.191	317.115	273.903	377.98	387.968	376.035	340.354	423.708	356.809	382.817	247.258	273.775	346.835	235.397	238.777	219.251
BCL2	12043	919.05	1193.52	1259.78	376.631	465.771	289.675	496.714	463.514	558.062	482.174	458.916	488.178	466.076	498.512	421.881	412.832	483.111	321.87	454.578	388.398	465.921	502.887	510.867	416.669
2410124H12RIK	76785	162.521	160.543	171.971	87.2754	95.0871	87.785	96.7104	94.7368	89.1696	83.2739	89.3879	83.1428	84.0125	83.4586	88.0534	88.3386	88.9227	88.9982	92.3512	92.1604	95.0023	98.3949	81.3818	86.9056
LRP2	14725	505.069	445.75	401.678	93.1364	92.0721	92.7957	99.0904	90.295	93.8849	90.7773	89.7925	89.9396	234.828	248.502	242.798	88.7631	91.0695	98.9359	94.297	90.4221	90.582	89.3739	92.4909	86.8893
DAAM1	208846	500.699	501.594	569.043	153.69	138.221	144.071	259.787	258.094	264.995	274.615	272.728	313.183	255.857	233.268	247.618	157.763	152.157	156.727	270.165	198.469	237.209	251.378	252.849	257.829
LOC383033	#N/A	169.777	208.083	285.023	85.5095	91.7205	98.0466	92.9326	86.8893	87.2099	105.658	97.6052	103.485	93.7385	97.3236	93.0602	86.1996	97.6179	92.6299	83.0503	97.8881	94.2846	93.3829	106.342	106.363
SH3BGRL2	212531	160.035	170.158	204.443	90.7488	89.4495	87.506	95.9995	92.55	100.033	87.5901	87.931	86.9939	88.1756	95.5355	95.5441	90.9066	100.955	86.9179	94.5391	91.4306	97.8881	90.9727	86.5959	100.244
4732423C17RIK	#N/A	741.421	782.681	643.338	334.898	319.222	313.183	408.241	198.745	372.164	290.066	306.194	311.17	356.092	298.888	306.518	346.555	298.888	292.918	268.841	330.471	274.248	207.753	241.258	205.309
AI115600	#N/A	398.375	467.961	387.198	179.194	193.904	163.011	143.411	154.369	164.311	142.435	135.744	133.413	166.25	165.329	131.646	246.377	169.825	163.671	144.479	120.222	136.749	151.611	167.691	125.744
TMEM2	83921	863.723	881.358	853.747	324.224	280.024	363.24	442.158	457.918	425.458	215.668	226.287	238.777	343.292	343.182	373.991	381.193	345.005	297.786	503.433	549.027	435.675	244.718	293.26	229.582
4732462B05RIK	#N/A	2435.7	2160.82	2221.24	901.257	773.988	878.931	968.743	440.243	531.093	1393.48	1090.04	1192.68	788.995	695.388	636.626	955.708	713.008	848.001	574.405	473.175	637.222	835.134	756.317	823.863
P4HA3	320452	363.666	485.878	407.727	89.5099	99.4291	89.805	110.962	103.837	119.826	100.877	124.075	122.696	114.766	158.981	132.685	90.765	90.4974	106.854	89.1696	87.5502	118.165	181.555	183.844	235.108
CDC2L6	78334	1213.66	1310.71	1346.21	449.798	670.306	540.053	374.732	786.691	505.647	540.803	551.691	422.746	651.699	581.446	629.958	559.478	601.275	528.978	580.148	537.804	634.443	457.163	411.009	397.285
SLC6A15	103098	820.215	954.713	818.314	540.053	225.262	347.126	98.9437	96.5802	95.8046	128.888	157.636	189.592	424.879	365.905	379.277	172.017	195.98	188.517	104.166	95.6167	91.2405	106.487	107.429	110.295
3526401B18RIK	#N/A	714.939	887.411	943.889	183.033	118.408	163.812	104.641	150.787	85.8003	156.255	172.352	204.824	408.825	471.927	457.271	126.954	108.566	127.741	87.2499	89.5995	86.1095	196.038	185.216	245.932
GSTA3	14859	330.961	295.334	350.557	119.11	105.429	95.7379	117.665	97.0862	95.4032	138.598	120.222	102.484	167.097	163.011	196.038	106.652	175.784	102.772	107.135	93.4508	104.083	130.421	126.942	106.207
A930003A15RIK	68162	195.755	164.482	155.366	81.2266	82.7886	90.0371	90.7158	89.99	102.787	88.3018	87.1135	96.1456	95.865	95.8993	103.33	89.1888	84.1913	84.9323	94.6874	93.0733	87.9232	86.3389	85.9987	93.8148
IFITM3	66141	190.765	187.549	205.851	1146.63	793.237	1196.86	2889.04	4004.27	2985.59	2133	1851.44	1861.72	1283.35	1424.22	1870.46	1685.84	1340.77	1208.16	4029.92	4429.57	4300.01	1814.42	1652.68	1883.01
ADAMTS4	240913	106.14	120.723	127.76	523.533	471.753	474.131	839.656	1124.31	833.554	687.397	674.264	777.573	349.191	517.445	492.943	817.591	972.485	619.469	814.746	657.65	613.383	671.517	735.46	564.496
LHFPL2	218454	415.551	437.75	511.629	1630.87	1800.44	1708.22	2044.82	2133	2391.7	2453.17	2621.52	2203.27	1159.4	1351.89	1367.98	1861.72	2066.06	2115.76	1560.97	2817.08	2179.71	2425.53	2938.44	2655.45
PROS1	19128	114.476	161.751	142.435	1696.07	1823.89	1453.76	786.691	653.526	784.1	719.208	718.906	758.357	381.793	341.788	338.2	1886.82	1760.88	1826.22	773.663	763.502	848.389	633.686	606.057	667.902
FSCN1	14086	192.989	209.976	211.279	489.27	427.895	501.469	903.628	1175.1	926.78	572.489	646.438	585.392	445.75	530.699	459.872	544.642	463.62	528.803	1161.97	1104.97	1026.07	606.254	538.562	548.218
CCND2	12444	126.829	123.205	140.927	651.424	431.644	604.641	280.788	294.875	295.699	720.557	715.807	919.464	289.447	289.183	348.014	527.335	506.481	565.24	339.043	307.951	342.45	738.78	706.551	899.199
IGFBP4	16010	150.655	166.889	231.439	513.228	436.035	617.879	1536.65	1450.85	1349.65	1425.27	1517.19	1509.24	606.694	655.322	688.497	680.376	445.125	726.77	1346.21	1481.62	1769.47	2793.63	2933.06	2380.93
TGFBR3	21814	130.013	142.219	158.36	1083.89	873.02	919.464	437.446	429.124	425.2	406.254	283.872	373.52	370.521	342.534	330.292	1139.04	862.088	840.614	475.162	275.734	449.068	534.122	426.646	595.2
UNC84B	223697	1104.21	952.406	1003.23	2207.95	1989.33	2203.27	2991.99	3369.47	2959.88	2515.53	2253.15	2350.71	1931.33	1903.07	2085.44	2071.9	2780.85	2142.84	3214.66	3548.27	3054.19	2023.07	2359.7	1992.08
SCL0001163.1_8	#N/A	135.804	116.183	108.39	220.566	248.778	258.094	1184.66	490.873	475.442	592.052	492.603	556.9	326.799	264.186	346.135	525.383	339.626	375.189	1116.72	270.801	495.328	873.02	727.686	715.536
MCM5	17218	200.588	257.878	209.068	1546	1687.69	1390.8	1583.3	1745.55	1416.64	988.3	812.776	936.298	416.016	461.427	443.037	1536.65	1634.15	1205.32	1488.03	890.863	1039.08	515.029	590.477	617.376
JAM2	67374	94.4669	97.4825	95.6748	286.936	172.518	206.036	429.368	409.241	348.302	279.887	271.448	256.887	221.421	172.476	284.684	193.175	171.992	154.643	451.756	651.993	542.716	408.726	389.701	342.382
B230369L08RIK	#N/A	1346.21	1248.13	1353.51	3221.51	2658.45	2605.36	3334.6	3886.45	3631.87	2943.58	2616.81	2640.05	2192.61	2126.63	2640.05	3272.62	2991.99	2655.45	3198.61	4094.13	3387.46	2616.81	2596.55	2661.82
CALD1	109624	96.2637	105.6	100.939	222.047	206.421	198.776	388.073	225.565	242.907	411.009	299.155	347.542	183.795	167.32	165.049	365.905	294.678	290.565	295.144	313.183	253.847	581.714	407.402	480.74
AKAP12	83397	144.7	150.405	148.871	230.958	239.596	284.632	349.458	384.42	229.779	906.452	862.604	836.588	299.465	297.706	262.673	483.64	551.519	426.251	522.381	665.521	282.997	319.611	253.8	345.379

## Sheet: M.markers
symbol	geneid	Cs_A1	Cs_B1	Cs_C1	Cn_A3	Cn_B3	Cn_C3	Cb_A2	Cb_B2	Cb_C2	Cm_A4	Cm_B4	Cm_C4	Vs_A5	Vs_B5	Vs_C5	Vn_A7	Vn_B7	Vn_C7	Vb_A6	Vb_B6	Vb_C6	Vm_A8	Vm_B8	Vm_C8
4833405F18RIK	#N/A	160.543	130.81	143.013	154.589	113.46	138.321	81.9032	84.4634	101.957	860.266	902.499	862.088	100.635	103.188	133.667	157.884	124.024	203.026	89.7293	95.6119	128.818	1555.53	1472.76	1543.4
5033414K04RIK	98496	159.251	144.16	195.996	218.171	152.841	314.554	94.4874	132.134	111.908	1443.73	1341.74	1921.36	121.037	139.252	160.734	222.878	221.539	318.155	96.0411	105.143	107.981	1357.35	1560.97	1634.15
TBX18	76365	91.0465	103.129	122.385	393.648	112.111	321.08	109.068	101.123	132.475	1449.4	1511.54	1546.92	156.532	123.739	134.982	248.869	209.899	369.39	128.384	88.8223	127.651	1593.26	1868.3	1894.83
EMID2	140709	164.672	228.619	241.543	451.605	193.151	437.75	104.906	90.7363	116.436	1656.22	1769.47	1760.88	107.097	116.401	136.806	209.214	226.083	339.803	97.1876	91.3139	115.378	2029.33	2085.44	1837.31
LOC98434	#N/A	96.3503	94.8999	100.221	139.548	92.3726	128.384	94.4095	88.1487	94.2411	837.02	670.306	849.605	102.68	93.4147	101.231	137.716	129.471	153.792	98.5068	83.2171	89.862	716.8	496.714	754.18
KCTD12	239217	378.367	484.549	668.096	1030.57	537.429	1028.88	663.917	695.022	818.011	3861.32	3756.03	4236.73	948.205	996.725	921.22	872.555	637.778	1002.86	1007.42	972.036	861.586	3108.3	3538.88	3824.29
PDGFRA	#N/A	131.97	135.711	177.379	343.383	122.103	341.479	103.369	106.544	167.224	1429.12	1546	1592.23	221.075	184.189	236.176	371.78	283.737	499.231	138.125	90.5558	155.45	2115.76	2038.69	2321.55
CYP1B1	13078	94.4039	96.7406	105.472	154.8	97.0552	121.972	88.2651	95.7978	106.427	771.684	530.491	849.061	93.551	98.6139	98.4874	95.7781	105.536	106.058	118.281	96.7345	89.7421	533.224	434.631	569.517
SLC1A2	20511	90.3903	101.215	96.0862	129.335	99.2249	102.754	94.4259	101.816	106.358	449.365	360.862	364.07	92.8971	97.821	96.273	96.3948	113.778	103.768	100.237	94.0924	97.3317	434.497	435.112	370.521
LOX	16948	175.069	173.261	242.106	101.338	90.6205	104.508	97.625	96.1277	101.494	711.408	661.173	797	94.0621	94.0295	96.3338	108.379	85.5768	163.573	85.9668	102.571	88.6398	762.477	727.085	1176.09
COL8A2	329941	100.417	95.1455	97.4396	103.799	93.5976	92.6548	95.3945	96.7192	100.865	292.791	284.088	386.021	100.675	102.404	103.153	95.5265	99.2663	106.14	92.6133	96.666	101.611	443.678	329.283	468.43
9030425E11RIK	71566	109.8	91.4816	115.456	159.086	107.085	114.285	115.926	104.794	111.173	600.562	685.03	663.917	90.7773	90.4898	96.3915	118.639	110.153	117.289	120.715	107.785	109.236	543.55	424.546	480.169
POU3F4	18994	94.8383	81.1283	97.2659	97.9382	91.5712	102.498	94.7927	97.8305	96.5383	272.461	328.604	336.819	81.6506	93.5618	84.6383	100.877	96.1719	102.404	99.0597	98.6265	97.6534	318.926	360.051	307.728
NBL1	17965	124.996	119.311	125.56	101.94	95.1093	130.879	97.9914	92.4195	120.844	338.63	407.154	378.062	111.889	101.215	120.437	97.7249	110.703	111.281	91.3028	103.826	95.2307	422.475	449.798	448.68
5930412G12RIK	319616	87.5808	89.6238	82.243	115.331	106.582	108.073	108.865	123.7	128.03	358.184	341.788	318.549	111.555	121.151	102.757	107.536	85.9478	98.3862	96.7076	97.9108	116.275	398.086	485.735	432.302
AARD	239435	90.0145	91.4261	94.4039	155.714	112.645	180.311	102.555	108.894	95.5355	562.758	514.633	564.282	99.1204	91.7149	109.787	177.774	165.026	162.301	89.3934	89.5681	95.6494	622.41	441.73	765.01
ZFH4	#N/A	147.058	161.916	154.56	126.859	113.178	136.879	87.6443	90.1178	90.8986	396.602	534.767	525.868	144.596	126.829	141.841	109.075	130.533	145.347	83.634	85.7213	100.712	724.789	584.953	532.559
TGFBI	21810	95.3887	109.125	133.91	320.872	119.665	215.017	324.737	451.143	514.633	1827.29	1534.59	1788.66	139.789	103.551	120.68	185.9	138.445	236.105	211.697	251.816	307.801	1191.99	1232.71	1286.27
RANBP3L	223332	98.1695	94.6746	105.131	112.138	100.821	96.4761	100.002	105.461	114.625	281.653	344.571	278.578	93.694	102.936	95.7185	113.536	118.211	125.64	106.336	101.307	112.563	828.177	764.666	749.009
PCCA	110821	136.107	148.58	147.162	164.288	120.733	161.605	148.435	181.784	167.952	490.743	470.62	415.127	136.818	134.71	138.498	133.886	131.045	157.99	183.21	189.423	180.531	718.906	610.407	519.89
ETV1	14009	126.963	141.751	165.813	172.687	176.224	188.549	126.535	115.225	204.175	646.438	586.549	652.684	253.906	263.156	252.61	232.336	226.591	246.412	131.253	151.254	147.456	685.526	720.845	576.573
FOXD1	15229	84.4342	94.4485	88.6604	106.45	97.0862	111.281	95.3631	87.2499	101.544	360.803	323.792	380.93	107.11	97.4768	89.6795	100.457	95.986	104.8	104.244	98.0795	97.05	241.41	249.814	356.23
NOPE	56741	454.879	398.584	494.673	251.989	163.438	181.623	113.607	98.7722	123.621	1396.13	1150.02	1111.17	284.328	250.931	274.314	164.543	111.857	177.353	106.301	102.446	111.863	1051.05	1196.86	1127.13
GSG1L	269994	114.618	112.922	105.413	161.545	91.4261	167.914	93.7226	103.288	108.509	558.334	505.647	513.953	192.989	241.058	169.503	179.241	109.945	149.458	98.0873	104.842	103.242	655.784	735.693	559.299
OTOR	57329	230.822	353.414	1248.13	3875.17	811.64	4586.45	371.191	241.798	1075.25	11987.8	9570.52	18536.8	1611.86	818.571	1534.59	2501.05	1389.65	3991.7	597.936	310.364	1049.31	18536.8	18536.8	17132
MKX	210719	146.64	120.428	186.829	136.254	101.194	155.665	103.389	91.0007	84.0431	779.128	829.467	570.653	103.642	95.3594	96.1527	274.888	123.384	171.614	85.0255	99.6878	93.3011	767.658	861.255	662.379
DDR2	18214	94.115	96.1565	94.926	100.134	92.8414	106.342	103.088	96.2881	83.5838	364.673	302.866	350.008	86.0731	87.9	89.1332	104.63	103.288	128.733	93.1076	112.099	95.8532	292.482	267.733	264.368
UNC5D	210801	101.198	99.5337	111.006	98.7362	95.3186	132.812	91.1072	90.8867	114.25	280.424	378.777	403.564	97.5041	115.543	103.51	96.1013	96.6498	107.229	99.1511	91.4364	99.5984	269.53	293.478	300.791
LOC100047583	100047583	97.4087	103.226	110.802	327.005	99.4742	326.214	128.039	140.314	234.072	1786.43	1692.55	1630.87	216.972	208.843	245.997	593.141	336.663	812.776	177.044	151.436	187.528	2998.17	3361.26	2648.57
VCAM1	#N/A	90.8986	88.0156	95.2015	97.0552	94.8308	97.0065	105.608	97.5082	102.621	224.186	227.672	324.656	94.1508	89.0385	94.3933	101.44	95.8046	111.819	96.0576	109.77	99.5272	263.327	231.215	413.295
4930594M22RIK	654799	101.59	105.573	110.955	114.59	105.098	84.4027	92.5075	118.591	167.691	436.521	330.155	331.817	102.28	104.438	99.6878	111.654	92.9994	116.648	125.734	101.077	103.576	631.566	462.167	327.287
2810046M22RIK	#N/A	211.401	202.054	199.649	130.002	102.031	113.363	94.087	86.7462	98.1776	666.105	574.265	588.459	210.006	153.312	297.706	99.3743	112.067	162.566	104.143	89.5349	95.5477	1534.59	1260.75	1378.97
TWIST1	22160	84.113	96.988	98.9359	102.38	106.83	109.299	95.0113	116.467	111.637	230.117	282.539	244.609	92.8784	84.6714	99.6337	105.268	100.308	99.702	104.886	103.675	89.0304	270.334	272.416	223.514
2610017I09RIK	66297	476.844	444.901	549.65	301.601	98.1257	283.639	87.4935	90.4035	154.088	1456.07	1346.21	1668.85	215.184	221.819	227.442	179.219	117.208	240.414	140.571	99.0035	113.314	1182.82	1044.53	1317.57
ADAMTS12	239337	109.965	114.15	114.647	238.679	116.177	315.184	395.748	315.262	336.137	977.791	1020.5	799.722	141.918	140.763	147.86	189.483	153.229	269.686	360.451	337.769	428.997	1276.94	1353.51	1174.46
VSTM2A	211739	90.9668	90.5759	97.9382	169.247	100.439	122.243	91.0962	96.6087	92.7044	325.183	314.885	395.422	88.5092	91.3728	102.243	106.676	87.9557	127.208	98.3905	100.181	96.9467	403.564	606.475	545.488
ARHGAP28	268970	121.199	115.827	120.633	165.837	129.18	147.845	179.219	163.474	216.972	514.259	600.562	540.283	130.409	123.621	125.98	161.545	100.675	109.638	157.094	234.762	195.861	503.433	554.261	429.485
AI317223	#N/A	100.623	101.749	98.8705	143.78	106.79	137.686	119.761	240.788	171.646	616.39	548.218	765.778	106.458	106.509	102.262	117.831	206.605	162.112	169.268	246.513	265.435	485.011	608.349	906.836
EMILIN2	246707	129.392	112.362	121.314	144.127	100.387	111.831	118.056	99.1511	97.6591	467.838	328.088	403.889	137.819	115.809	109.492	114.985	119.13	111.046	98.5907	123.556	94.4634	258.861	286.196	297.786
PRRX1	18933	93.6682	90.8719	94.2319	101.527	94.4806	114.458	95.2525	96.4412	95.7781	310.364	301.065	291.488	93.2192	96.061	96.3072	134.301	147.604	162.824	103.493	100.549	101.59	442.158	480.529	460.518
FOXC2	14234	92.5989	93.236	98.354	104.89	99.9399	125.537	162.755	128.008	163.247	282.749	369.617	489.27	89.2357	105.131	103.542	112.589	104.166	128.316	98.0011	97.7919	102.75	380.686	403.3	627.743
PTN	19242	5170.02	5068.65	5112.32	4333.16	5090.57	4633.86	615.931	908.475	841.007	10384.6	8931.34	9899.85	4508.46	4586.45	4846.55	4689.55	4815.97	4378.41	965.431	1084.6	818.571	11367.7	11367.7	8931.34
ITGA10	213119	99.5984	115.385	105.182	178.582	133.736	120.896	112.104	88.3386	98.5907	901.854	581.057	393.545	113.379	106.253	96.927	141.389	101.373	103.44	97.5511	124.034	98.8006	427.352	325.183	306.679
AXIN2	12006	177.774	187.376	183.714	188.062	219.111	246.038	156.371	170.3	212.317	606.475	695.388	573.513	147.181	213.513	278.174	233.771	247.121	335.872	187.357	228.516	173.92	651.424	730.596	652.213
REPS2	194590	103.005	103.7	103.593	95.6439	85.3544	94.9205	89.2784	93.0602	93.9014	218.323	222.458	214.116	122.08	125.45	119.041	113.784	83.4586	96.4296	89.0703	91.9221	90.8867	336.137	275.051	335.813
MTERFD2	69821	483.777	463.76	439.812	434.738	340.71	290.847	436.521	319.395	293.401	1634.15	1398.37	900.79	421.941	483.503	433.972	304.206	278.754	346.9	411.983	399.649	311.654	979.489	1049.96	824.944
KCNK2	16526	88.5092	99.3613	99.616	103.624	91.8421	104.343	94.5663	89.9348	95.9206	209.491	175.916	244.086	99.6409	94.5919	101.338	94.9161	94.8433	97.6763	94.1392	96.952	91.3728	262.093	243.425	258.41
A430107O13RIK	214642	85.2557	88.3018	83.941	94.4485	87.8492	91.7034	90.1606	88.7472	86.9179	189.36	186.807	178.453	93.1408	87.4674	86.7184	100.011	87.1305	107.129	98.522	107.804	90.1251	321.241	344.421	264.898
AI593442	330941	88.1955	90.3427	95.2307	116.03	89.9478	97.821	93.3649	96.3236	108.881	427.895	254.315	565.02	155.071	154.369	120.346	104.015	98.1939	108.112	95.7006	98.4515	96.4196	314.705	327.645	569.043
SERTAD4	214791	286.67	241.312	188.027	187.336	104.886	181.121	103.837	98.3301	119.56	1348.6	1252.59	1318.9	451.605	318.926	238.536	122.5	110.999	124.576	107.358	91.0962	110.085	794.408	926.78	740.22
SLC1A3	20512	551.019	475.162	618.349	450.586	203.509	372.081	107.645	96.8619	103.897	1856.73	1848.96	1552.84	892.739	839.28	956.163	267.697	199.585	285.079	136.652	98.3301	102.687	2395.57	2463.03	2109.88
OSR2	107587	88.0403	93.3829	91.1652	116.065	92.8729	98.8848	87.5808	93.6024	102.931	313.993	186.315	259.965	84.8619	95.2414	92.4021	97.072	95.8852	97.9844	93.3495	87.7418	89.5349	187.357	207.644	223.194
MLLT3	70122	268.841	298.952	264.13	246.931	183.083	207.569	224.382	274.248	197.208	496.479	513.032	498.032	300.118	309.475	267.104	250.839	181.939	221.317	247.845	302.21	208.412	617.376	731.408	648.702
LRP1	16971	357.83	331.523	402.784	577.044	766.577	629.352	140.041	126.402	119.584	1603.54	1277.88	1520.19	462.362	417.883	382.817	797.407	764.666	793.577	141.144	117.711	142.048	2122.51	1583.3	1711.02
EFEMP1	216616	299.769	233.697	320.823	265.685	135.427	182.106	102.692	120.697	126.342	1765.11	1492.55	1607.09	128.985	106.544	158.671	141.771	128.353	126	84.1913	99.8658	87.1305	667.902	536.528	511.466
CNTN3	18488	92.4739	95.3501	98.4731	113.489	96.0576	125.431	91.3584	104.52	98.7325	318.782	287.736	362.779	115.232	97.9475	104.809	112.999	110.354	122.427	106.83	97.1024	105.436	261.331	199.649	245.298
SLC30A10	226781	86.8491	87.6626	87.1431	93.2408	91.3297	94.9898	87.4178	88.2368	91.8928	151.629	155.257	160.121	89.3475	91.5033	93.3495	95.6598	93.4147	92.7538	86.5142	87.9796	93.0668	216.577	307.447	254.5
3732404C04RIK	#N/A	93.0947	92.7367	91.1787	101.107	93.9435	95.6119	103.962	94.3494	97.4279	275.265	221.63	218.244	91.4643	87.0215	93.4147	90.183	90.4777	91.9511	121.75	115.4	103.867	328.375	233.563	191.029
LYPD6	320343	256.381	268.281	251.708	137.658	146.377	157.99	103.763	91.7751	111.256	509.141	519.076	459.993	122.253	129.594	145.155	232.384	202.054	298.14	112.111	104.268	94.2411	692.257	799.722	676.311
GDF10	14560	91.5564	85.315	83.8598	109.672	91.2347	104.901	98.5068	104.083	100.141	397.349	206.829	589.402	84.0431	91.1126	95.9108	92.4389	93.5618	134.335	87.839	94.6407	99.7186	703.391	460.81	788.332
HOXA2	15399	89.6579	94.2445	88.1128	97.3418	96.1811	106.643	91.7697	96.4196	100.635	198.469	207.18	197.947	86.5142	87.9232	89.6082	90.2281	100.671	108.57	103.148	104.771	101.055	165.172	192.517	211.054
PAM	18484	255.506	202.518	303.658	412.832	431.987	506.313	512.32	633.925	651.699	1127.13	982.774	1390.8	372.081	344.274	388.194	448.568	585.838	541.734	579.29	649.258	627.3	988.787	1004.45	1295.68
MCAM	84004	715.536	853.747	617.376	1201.72	1738.39	1051.05	1600.46	1366.8	1517.19	158.213	195.257	137.302	664.249	803.311	711.695	1777.74	2071.9	1276.94	1448.02	1440.27	1454.77	159.399	207.487	170.855
TRIM25	217069	607.367	521.567	777.808	655.959	546.172	811.64	1400.64	1696.07	1681.79	134.153	132.94	136.458	769.496	750.835	985.35	741.421	642.225	850.451	1576.45	1630.87	1856.73	175.655	170.158	186.617
MAL	17153	723.56	568.331	492.42	1199.66	748.374	930.341	346.555	326.367	352.608	106.288	99.0337	96.5138	614.919	564.692	718.287	1544.88	1150.02	1426.17	476.376	430.735	341.081	137.771	122.138	115.372
ANXA2	12306	4412.62	4897.41	4060.13	2968.39	2730.25	3419.85	4300.01	3954.22	4393.65	1238.36	1044.53	1349.65	2671.5	2900.81	2501.05	2954.07	2943.58	2695.74	4264.89	4072.38	4029.92	1313.99	1026.84	1389.65
FLNB	286940	1538.69	1416.64	1262.55	944.263	975.358	927.839	1426.17	1541.45	1492.55	380.348	419.532	419.423	1372.02	1168.37	1335.25	749.423	834.789	830.308	1679.73	1538.69	1528.3	315.882	290.339	341.631
NOTCH1	18128	597.691	631.566	666.468	659.494	765.311	722.735	547.165	669.188	592.886	183.959	211.764	227.14	475.01	463.936	601.475	397.109	607.158	694.268	717.985	660.934	721.127	214.116	216.423	203.623
SPATA13	219140	1407.44	1298.21	1511.54	665.253	737.496	640.663	965.431	763.838	948.205	270.379	296.668	318.464	926.24	839.656	1022.6	733.202	618.927	628.219	1182.11	1106.9	1080.92	293.183	301.386	359.537
ITGA6	16403	204.898	243.941	224.042	627.494	627.494	524.689	449.515	421.179	439.503	103.384	104.593	106.26	195.861	177.493	184.409	603.35	559.652	558.555	505.359	528.597	456.009	95.6655	104.251	95.8993
ST3GAL5	20454	935.283	813.059	904.396	1181.24	633.167	1158.52	804.45	793.237	1033.57	218.529	329.809	289.741	1396.13	1749.8	3073.57	995.732	1017.22	1167.04	841.007	950.443	849.605	365.31	213.387	404.328
SCHIP1	30953	843.84	807.199	897.725	968.743	1049.31	1125.77	856.9	787.071	727.085	218.171	207.845	275.521	498.032	427.606	717.704	1030.57	949.826	1026.84	683.299	768.51	753.353	182.913	193.283	206.636

## Sheet: B.markers
symbol	geneid	Cs_A1	Cs_B1	Cs_C1	Cn_A3	Cn_B3	Cn_C3	Cb_A2	Cb_B2	Cb_C2	Cm_A4	Cm_B4	Cm_C4	Vs_A5	Vs_B5	Vs_C5	Vn_A7	Vn_B7	Vn_C7	Vb_A6	Vb_B6	Vb_C6	Vm_A8	Vm_B8	Vm_C8
APLNR	#N/A	97.8573	103.546	98.7682	138.51	91.7751	92.8569	2586.56	3361.26	3548.27	94.3794	92.6361	94.6746	93.7922	113.074	91.266	99.2747	106.719	96.9206	2401.16	2852.43	3519.75	106.391	92.1308	90.7308
CLDN5	12741	110.172	239.787	117.417	422.237	116.798	100.86	8299.79	9899.85	9899.85	122.828	116.83	102.237	121.437	287.106	102.087	167.266	120.502	104.901	7143.49	7791.76	10384.6	169.102	115.306	121.003
CD93	17064	94.975	108.82	92.4252	130.28	96.2407	99.7833	2560.55	2520.63	2719.3	99.5755	94.1738	97.749	96.424	118.268	92.6361	101.005	100.717	126.848	2541.06	2082.36	2968.39	112.179	99.9675	105.531
BCL6B	12029	95.2615	110.941	91.859	130.157	112.116	103.63	2095.02	2805.51	2541.06	103.082	100.7	100.051	95.7006	128.324	101.386	119.637	128.1	110.639	1797	2154.61	2357.09	112.636	115.699	103.58
SOX17	20671	86.319	93.9258	89.3739	91.9768	94.81	91.0404	1169.73	1353.51	1273.78	87.7789	88.5738	86.9538	86.1996	96.8184	89.1813	87.6284	82.5217	87.931	1467.83	1522.2	1342.78	91.1266	86.7184	88.5294
PECAM1	18613	90.71	99.3221	87.5901	102.37	99.8511	93.8957	1208.16	1343.76	1325.35	88.7084	89.0455	93.9639	91.7587	91.0525	94.7709	98.5331	100.787	92.3627	1483.2	1484.87	1493.8	91.2247	93.1408	94.9122
CTLA2A	13024	97.8747	111.92	91.0465	174.154	112.436	116.812	2215.58	1891.27	1858.46	95.986	88.8542	89.9001	98.1385	153.229	100.966	168.595	115.97	122.807	2290.17	2328.64	1927.01	103.873	86.7666	97.142
LOC100047619	100047619	120.358	183.416	170.826	283.789	182.357	235.258	2712.85	3528.77	4106.19	150.405	146.924	248.913	134.118	213.475	150.394	181.868	185.66	263.215	2793.63	3886.45	5112.32	152.841	129.558	177.774
RAMP2	54409	98.5127	113.501	93.5777	166.308	118.696	132.283	1781.6	1974.33	1683.54	160.678	163.329	181.345	101.241	117.18	85.9987	97.5275	151.222	133.413	1779.34	1720.62	2151.68	137.01	152.366	162.402
LMO2	16909	98.2537	118.94	102.192	200.039	135.601	202.152	2701.15	2605.36	2480.57	258.41	281.105	278.409	211.316	168.971	107.895	226.674	188.199	190.266	2933.06	3308.73	2912.83	291.8	269.047	277.126
ESAM	#N/A	92.6042	177.018	98.0505	296.717	118.065	159.462	4123.96	4485.96	3689.8	120.005	134.095	102.782	120.68	209.976	100.598	457.918	331.906	393.648	4586.45	5289.97	5754.24	198.717	191.519	135.096
SHE	214547	87.7789	90.0881	93.0859	104.251	93.2447	113.031	1580.51	1312.97	1797	152.933	158.616	163.22	89.1427	94.7519	98.2986	112.036	140.996	103.469	1557.06	1984.35	1833.91	134.778	105.171	128.395
CDH5	12562	90.183	99.7833	92.8784	99.4791	91.3028	91.0642	950.964	1020.5	1084.6	91.9578	96.666	92.6257	88.3899	90.678	96.0917	90.2799	89.1031	93.9487	847.215	1212.76	1257.28	99.3992	94.9851	106.775
RASGRP3	240168	106.006	99.5203	100.433	108.924	89.7925	103.005	1211.07	909.875	1198.72	87.4796	103.652	97.7433	106.532	118.53	114.725	109.464	100.281	114.438	998.363	1228.07	1195.92	106.402	98.5274	116.204
EGFL7	353156	116.523	121.894	126.829	141.869	115.191	121.273	1421.75	1758.52	1078.46	103.479	101.111	111.126	109.351	132.123	118.982	114.719	128.705	125.548	1376.79	1949.88	1262.55	111.593	107.599	104.508
ARHGEF15	442801	98.7919	101.039	100.549	117.547	110.079	108.988	1025.49	1358.92	962.554	112.436	127.98	105.114	96.9748	100.128	101.828	96.9317	106.835	95.7099	1271.63	1385.56	1306.41	105.395	108.219	103.947
LOC100048710	100048710	83.4143	87.88	87.2848	89.8	90.9811	89.3475	1290.78	767.959	1298.21	87.0878	84.5899	85.2968	92.6903	97.7972	85.5768	95.986	88.9822	87.1135	1393.48	732.897	1198.72	82.7886	90.5315	85.6545
PTPRB	19263	84.8619	99.0141	87.9	164.054	113.118	142.263	1760.88	1553.76	1206.39	90.5759	89.7464	89.0703	88.5419	120.245	89.3999	140.653	130.869	127.513	2095.02	2643.83	1893	89.1514	91.9907	83.7883
ROBO4	74144	88.3281	91.8108	87.3061	96.7741	90.945	91.8723	883.831	756.614	709.347	93.8462	99.2452	96.6569	87.785	94.9814	87.5502	93.9575	92.0846	98.6372	921.699	850.848	852.889	96.3072	89.4105	92.6042
DSCR6	#N/A	96.5623	93.427	103.656	103.526	95.304	98.1385	1008.84	955.708	885.332	106.319	101.59	103.202	88.0403	117.802	120.074	98.3584	87.4674	94.7832	856.515	924.273	1104.97	99.2747	93.5324	93.0602
PLVAP	84094	96.3999	105.407	96.7313	94.9456	95.0966	90.6144	906.05	855.956	736.438	96.4296	91.5244	92.3166	90.4144	99.2025	97.9108	90.4606	101.435	99.5017	1036.16	1217.65	1316.48	101.208	93.9536	102.531
FLT1	14254	93.3737	100.1	90.8035	104.473	87.5626	87.8014	883.43	760.143	729.209	90.3213	87.1002	91.0069	83.3648	97.7535	88.7801	91.0913	88.8029	88.1662	1603.54	945.712	1084.6	94.0009	92.7268	95.0966
MFSD7C	#N/A	108.588	139.589	147.698	300.118	134.335	181.516	2085.44	2129.83	2275.93	158.039	150.47	159.561	119.332	138.912	130.303	222.579	160.788	299.972	2142.84	2473.36	2401.16	261.84	171.646	268.281
SLCO2B1	101488	96.0112	133.209	91.2892	242.438	193.584	213.967	2189.71	2304.5	2515.53	141.572	109.593	116.012	285.577	205.247	119.347	316.073	233.348	290.066	2324.41	3441.6	3130.24	105.899	140.266	116.195
KLHL6	239743	90.5926	89.1813	91.0199	118.408	106.11	111.92	1024.23	1106.3	861.586	94.1392	92.2158	91.4992	91.7205	106.088	90.6598	126.859	117.766	119.928	1096.08	1015.07	1054.2	102.86	99.9727	110.272
LOC100044934	100044934	89.1332	98.4874	89.0703	107.307	95.8046	89.3879	838.821	778.122	827.55	90.1457	90.4974	90.3093	86.632	94.5713	94.7777	91.8169	99.2747	85.9987	722.502	736.077	904.839	94.1738	91.7918	85.6173
BC020535	228788	88.6604	92.5989	89.8919	92.0892	83.2171	85.5768	712.403	992.389	627.026	87.2848	81.2266	88.3988	91.9705	91.4065	88.7277	85.8366	95.5394	90.3839	1073.52	1301.01	783.733	83.5111	88.4061	81.6506
D530030K12RIK	#N/A	86.8756	91.6568	90.3687	96.2446	81.5137	89.2985	808.072	645.154	621.123	86.5376	85.6545	82.3118	90.1514	89.6738	84.8337	86.3793	89.8337	87.6284	719.92	646.438	649.531	87.5626	88.6025	85.6367
GPR116	224792	79.7439	89.2209	83.6777	103.206	92.8686	88.7631	1091.65	948.696	838.308	124.865	115.06	114.064	94.081	97.7697	93.0501	86.2693	96.2774	92.4437	1316.48	1340.77	1135.89	132.417	89.8128	89.0304
GIMAP4	107526	87.7315	95.6242	88.3709	101.839	93.3182	90.2576	760.501	832.068	620.584	87.8699	92.9994	94.3991	88.6398	91.8928	92.3273	94.4443	89.5681	88.3173	776.316	882.449	733.832	91.1544	91.2347	94.6074
ESM1	71690	85.7213	92.2034	88.7415	103.434	83.3199	89.7638	677.547	826.578	845.927	89.3475	90.3483	90.1326	90.945	112.047	85.1328	102.243	94.5349	89.6437	1486.29	1613.45	1503.41	91.1018	94.2846	91.2347
SCARF1	380713	93.6472	93.9575	87.9129	98.7919	93.8957	106.876	676.311	848.777	761.944	96.4656	104.924	96.5897	91.83	94.1508	84.0431	113.425	114.799	114.19	705.327	694.737	719.555	110.67	111.193	103.393
SLC38A5	209837	89.0522	102.273	88.7277	146.45	85.9478	90.0645	2648.57	2232.57	2599.72	108.881	97.7089	107.352	105.461	111.555	96.2354	93.5324	86.0612	100.151	1995.09	1861.72	2371.02	276.657	230.766	317.267
APLN	30878	123.667	174.511	187.123	111.418	97.0975	101.035	2136.31	1558.06	2581.64	114.833	121.92	172.308	142.416	167.404	148.167	109.644	99.0804	93.4441	1848.96	1082.4	2244.9	125.08	141.629	162.686
EPAS1	13819	99.9015	107.345	98.8757	132.542	105.523	147.954	1779.34	1984.35	1495.73	174.271	148.646	135.363	148.221	140.395	128.694	261.84	245.555	204.206	2032.74	2339.49	2308.85	239.596	266.893	224.756
SOX7	20680	89.1514	91.5987	92.4856	108.929	94.2371	91.0589	644.584	711.695	608.863	88.9895	86.6095	91.5987	97.4957	99.1648	86.6511	94.8553	87.3944	89.8785	689.904	834.466	682.75	92.1308	89.7559	88.3609
MMRN2	105450	103.273	97.184	102.202	107.097	96.9789	91.7252	910.535	649.531	824.503	98.6018	88.4919	95.733	99.9356	93.996	98.2731	116.605	101.349	96.8743	932.248	914.585	1016.53	97.0975	91.3584	99.9675
ICAM2	15896	85.6367	99.4032	97.4903	88.6107	85.0556	96.8141	580.619	679.324	714.939	94.0009	86.8346	83.8598	90.8986	82.3944	84.9604	85.9131	95.1703	83.4143	636.203	552.354	678.224	87.066	91.8223	89.2538
1110006O17RIK	68545	100.276	99.836	88.0156	105.285	87.572	95.5105	728.922	718.609	841.719	84.7776	93.0733	95.9995	92.3166	99.3383	104.424	122.024	119.818	126.166	676.311	770.204	697.848	97.4957	95.4252	97.2889
IGFBP7	29817	180.691	204.753	220.566	339.154	264.299	318.625	2515.53	2321.55	2401.16	195.119	188.225	236.394	172.404	241.543	188.488	392.889	422.843	427.503	2852.43	2581.64	2800.46	435.008	400.168	423.099
PCDH12	53601	86.7032	88.9822	81.8518	91.2347	86.527	87.4796	499.231	590.052	730.905	86.1445	94.2734	87.506	85.2968	87.7418	91.213	90.1102	95.1455	94.5492	537.229	592.469	703.698	88.7343	88.3018	87.7667
C130074G19RIK	226777	91.1072	100.329	93.3922	125.037	97.5362	91.2247	1218.62	1464.11	1269.77	100.308	108.137	110.412	96.9599	111.335	99.0204	104.409	106.783	102.897	1204.11	1302.26	1675.81	211.864	201.211	231.466
ANXA3	11745	97.9035	124.059	101.596	119.268	100.7	104.444	902.499	694.737	785.509	107.315	108.772	119.05	112.124	115.212	134.769	110.419	110.603	119.301	933.206	729.649	936.661	98.0063	103.63	117.948
TEK	21687	99.4032	103.278	93.3961	131.922	93.5255	97.3655	1478.71	1524.32	1732.34	257.213	210.856	275.397	91.8009	100.017	83.7267	110.491	98.1422	95.2989	1413.32	1453.76	1576.45	176.989	182.632	172.268
LOC100048537	100048537	100.308	88.2894	92.2332	97.2938	89.7559	120.317	967.022	928.49	1056.14	112.936	109.36	99.1789	112.348	100.517	102.05	186.966	127.356	149.955	1383.85	1342.78	1251.41	190.356	160.953	175.732
SOX18	20672	89.4773	102.697	88.9822	99.4568	93.6336	88.6196	647.879	640.663	867.3	93.0775	89.8487	90.8035	81.8518	85.7023	89.2357	97.7535	90.6666	93.6024	498.032	979.489	1097.33	92.3906	84.752	95.227
LY6C1	17067	98.1629	96.625	106.702	112.268	98.8848	111.538	692.824	533.692	601.275	110.763	105.726	98.0795	95.6748	102.525	84.2517	95.8812	112.124	100.502	728.233	878.931	941.578	99.6273	94.7832	91.4916
EVI1	14013	106.803	118.319	114.19	151.934	126.774	119.54	751.992	959.871	705.069	97.4227	105.455	108.019	98.4442	107.976	104.714	125.459	133.321	143.293	1069.85	837.768	760.888	99.4291	99.6837	110.201
GNGT2	14710	93.6855	92.3512	90.6082	151.222	98.1695	135.034	870.12	1034.14	983.942	123.69	104.409	115.3	110.079	135.374	172.518	166.48	109.926	155.331	800.082	1158.52	978.848	145.996	146.492	124.738
CENTD3	106952	175.304	292.482	170.786	593.141	447.743	361.407	5944.22	5894.9	4948.23	765.01	804.45	523.533	207.18	354.686	108.906	728.922	1050.59	603.602	5516.82	5478.26	4815.97	228.384	316.126	188.09
RNF125	67664	95.5105	92.4739	89.8487	114.078	97.0241	100.334	521.923	550.811	633.925	118.89	118.484	123.238	86.5652	88.7801	96.8874	106.011	96.2131	103.278	617.376	767.658	600.298	111.309	113.942	108.777
4933417E01RIK	#N/A	117.568	101.583	105.486	150.113	99.8223	118.484	860.266	745.583	626.206	117.357	109.426	108.865	99.6937	99.2407	91.8072	111.309	111.925	103.92	1107.65	966.601	937.225	105.401	107.032	112.886
FXYD5	18301	96.6884	94.6173	101.712	167.577	154.96	147.347	1139.04	1044.53	1039.08	98.4329	98.5068	117.775	113.098	98.6018	92.55	252.238	233.563	243.759	1333.3	1229.93	1338.64	183.008	132.571	170.073
ANKRD47	80880	136.063	140.996	115.926	148.753	121.057	134.282	650.715	810.001	747.075	144.009	149.173	134.353	122.418	104.042	99.6636	110.948	115.431	109.893	785.071	1037.88	821.74	158.123	146.01	145.628
TIE1	21846	84.4634	81.5137	93.2305	102.68	91.8072	89.2651	545.135	717.416	490.873	103.231	102.537	114.666	95.7495	102.581	86.7318	95.4339	111.799	94.886	531.594	569.517	610.7	102.812	107.785	119.79
CTLA2B	13025	87.572	95.304	90.1457	121.069	95.0161	111.235	658.247	564.692	642.754	84.9323	87.4674	85.1955	121.495	101.655	88.0737	137.552	125.137	136.119	706.551	630.475	561.055	87.4674	85.9478	89.7559
IFI44	99899	93.5673	94.3494	103.63	93.1299	93.0859	86.1445	413.496	415.777	562.951	92.3273	98.0217	93.1767	93.1299	103.411	101.302	94.9557	94.8553	96.6884	597.247	873.02	571.849	91.9634	96.5553	102.141
GIMAP6	231931	100.427	104.547	99.407	107.866	101.922	125.99	600.298	611.445	648.702	98.246	108.231	106.916	107.105	113.778	90.0371	128.896	126.37	105.36	513.833	666.105	640.41	113.174	110.266	109.414
CALCRL	54598	98.3102	98.1695	96.6884	114.625	84.7236	114.451	1452.52	1266.61	1573.28	213.595	193.86	230.508	95.2015	100.324	103.681	106.384	117.226	116.03	1520.19	1281.9	1641.86	320.117	244.547	264.995
6430550H21RIK	245386	93.6425	99.1204	106.923	101.403	92.0769	85.9668	506.481	645.602	848.777	89.1888	88.257	91.7799	115.991	110.922	99.2366	99.1204	100.958	105.627	450.109	987.771	798.923	96.8703	98.697	95.2126
DOK4	114255	185.216	234.63	272.994	129.471	131.71	178.582	1466.61	1201.72	1420.53	172.75	197.475	193.124	164.398	162.236	152.581	146.987	169.081	124.484	1031	1365.97	1216.63	189.079	225.366	184.762
COL15A1	12819	81.2266	104.855	91.2247	576.373	208.001	234.495	2395.57	2701.15	2129.83	266.81	161.06	184.278	120.074	103.721	89.5905	527.631	269.093	314.554	2879.5	3419.85	2985.59	360.451	324.029	242.747
ASB4	65255	93.2151	93.5084	90.8254	99.2699	88.4249	94.297	640.41	553.364	364.16	85.3726	86.942	92.3569	85.1041	98.3949	94.8903	92.3113	94.2445	89.9753	886.619	1175.1	510.472	96.4296	89.9095	90.3213
HHEX	15242	89.8715	97.0289	92.6903	112.621	93.6205	108.522	613.128	704.308	884.398	96.6041	93.6278	88.5822	97.7335	110.295	101.655	122.978	112.745	135.711	493.85	776.316	794.043	99.5561	97.3544	97.3655
FLT4	14257	89.0787	91.8421	84.7236	96.625	87.7583	88.0024	362.779	463.373	458.3	86.1886	93.4808	88.6107	88.7343	94.5492	91.9352	94.975	96.5183	96.5304	351.07	440.981	451.899	94.6074	95.4446	87.705
2810043G13RIK	#N/A	105.974	129.958	112.297	141.989	106.771	141.177	911.892	1045.76	503.794	116.804	118.731	119.616	108.515	113.735	113.586	106.306	115.641	111.351	1171.5	1870.46	829.467	119.577	105.886	116.29
PLXND1	67784	96.9599	102.996	97.2306	446.076	335.6	438.503	1870.46	1965.16	1979.24	181.274	154.627	159.709	121.693	112.527	91.3028	468.586	397.349	405.458	1749.8	1997.41	1661.76	196.551	166.913	162.335
ELTD1	170757	99.04	92.4665	93.5831	88.2894	95.9385	92.0022	360.629	516.577	529.821	87.8578	89.2651	93.5618	97.4136	92.0721	88.5188	97.5766	102.818	95.0275	522.566	769.875	575.676	97.2889	89.3211	94.1238
ABI3	#N/A	85.447	94.9033	92.8634	103.263	97.9108	100.933	377.325	389.789	421.056	96.015	93.7385	92.7268	94.8308	98.0063	97.4279	107.168	91.9768	94.1683	379.074	359.989	413.915	91.7149	101.765	100.232
ABCG2	26357	98.5652	97.7919	108.224	165.049	131.023	144.257	1151.56	998.363	1173.82	293.053	254.057	272.143	105.36	115.911	120.763	163.671	158.36	172.175	1083.14	1218.62	1163.4	234.041	236.394	299.155
LOC328820	#N/A	85.3299	86.2693	87.052	105.413	86.8893	88.863	359.901	349.693	355.862	97.3039	99.6977	94.2319	87.0755	98.2731	86.632	83.8598	83.3648	93.3685	422.356	407.31	493.099	95.1202	84.333	81.8518
SEMA7A	20361	91.4413	90.1326	92.5862	110.348	102.777	117.673	568.331	416.016	573.146	86.284	95.1397	92.4601	104.209	128.071	123.585	109.957	113.153	112.977	633.466	646.245	713.347	87.88	94.3494	92.4601
THSD1	56229	111.264	117.326	106.818	121.798	113.065	117.517	693.328	652.51	787.071	106.87	109.747	99.7884	128.193	117.61	144.681	98.182	130.47	120.896	480.529	845.316	898.693	117.474	137.075	150.667
ETS1	23871	99.3673	97.5824	95.1397	200.677	224.343	239.845	1115.9	1315.2	1218.62	237.698	350.271	247.502	112.589	107.661	96.8743	282.263	319.815	267.302	1255.52	1227.16	1264.16	226.083	278.853	234.79
SLC2A1	20525	1616.47	1654.29	1330.48	802.699	897.339	780.227	5552.13	6695.62	6038.74	726.326	827.55	714.641	1666.87	1775.9	1127.13	717.704	521.017	544.23	6454.19	7031.18	8634.61	867.3	1019.68	833.931
A330042I21RIK	#N/A	94.1738	101.839	85.8234	83.7883	93.8676	86.7318	430.191	436.521	515.634	81.3818	83.9752	87.7667	93.2677	92.0168	89.1142	89.3934	97.0065	86.6233	317.606	335.063	521.567	88.6885	89.8487	87.7484
PALMD	114301	219.751	177.999	138.114	294.479	142.549	188.377	1804.86	1509.24	1548.47	354.858	309.66	301.601	134.663	133.441	160.832	113.267	188.956	156.271	1677.83	1540.29	1668.85	458.3	484.719	387.298
AU021092	239691	108.988	111.235	111.932	112.628	101.077	107.506	350.557	421.941	360.803	96.412	106.574	103.692	102.33	107.208	106.144	103.995	112.472	106.702	361.95	359.352	462.362	94.3883	97.6299	106.618
ST3GAL6	54613	103.033	114.739	102.927	105.291	95.859	93.6062	511.232	477.046	443.762	128.206	111.574	117.495	108.332	94.6371	103.048	108.255	90.678	87.0755	433.734	402.875	541.555	130.075	115.094	113.549
ITM2A	16431	334.186	290.419	306.394	302.146	286.409	321.507	1116.72	1029.37	1425.27	131.85	139.996	156.358	113.735	109.09	140.67	225.733	279.296	278.409	1141.96	1028.88	1367.98	218.244	170.761	275.521
LCP1	18826	95.859	96.7633	93.7114	126.615	100.775	101.89	636.011	669.983	749.423	93.2408	86.7462	94.3634	140.772	98.5965	95.9496	146.126	96.2637	149.627	560.23	458.023	728.922	97.397	92.2705	96.75
A330023F24RIK	320400	88.3709	91.4992	85.6545	94.8433	87.705	87.9557	544.044	662.646	650.919	101.749	99.0536	103.514	89.9644	100.387	87.6815	91.9634	97.7335	87.6939	325.093	502.429	414.867	95.8774	107.311	91.536
6230425C21RIK	#N/A	85.1499	89.9644	87.931	180.764	119.608	156.238	546.546	634.194	699.51	98.4515	102.508	93.0178	97.4227	94.8698	86.8893	143.606	117.467	155.025	580.34	650.145	723.56	101.661	107.091	103.642
PRKD2	101540	399.955	387.425	345.946	342.382	261.114	254.259	2463.03	2236.13	2173.28	495.328	543.55	526.591	384.332	392.992	360.239	218.914	345.946	330.155	2109.88	2224.37	1679.73	473.693	529.614	557.138
HOXD8	15437	94.9703	92.1504	86.6863	87.8116	86.0612	79.1423	368.14	345.648	457.569	88.4154	88.9822	96.6191	95.1357	90.4221	85.88	94.6955	93.694	99.6409	357.5	299.277	533.692	90.1606	86.8346	92.9098
SLC39A8	67547	534.122	634.708	750.49	252.786	128.712	149.517	2599.72	2247.74	2441.05	321.241	330.961	441.99	269.64	269.269	225.055	190.936	152.402	176.354	2730.25	2297.01	2510.68	217.37	223.545	265.619
A130022J15RIK	101351	103.681	102.512	104.293	105.674	101.367	99.2075	478.237	366.596	400.168	99.722	105.523	97.5362	109.195	97.6145	122.477	115.483	103.317	103.521	394.161	730.596	500.699	106.538	100.86	110.476
GJA4	14612	80.3514	95.8231	89.9095	100.979	92.4437	99.8716	428.023	371.973	487.971	95.4874	96.6191	99.722	92.3061	93.9487	81.1283	114.618	124.421	111.378	421.881	481.966	695.705	101.256	94.0075	102.654
DYSF	26903	105.175	106.133	104.23	97.1509	91.3249	91.4916	380.462	330.608	330.854	88.8135	89.2784	90.4898	91.8359	94.1428	90.2799	91.7918	100.445	91.9634	454.879	314.705	353.839	89.5807	88.6398	89.4236
B3GNT3	72297	90.4606	90.4081	92.8971	98.3501	94.6498	102.06	480.169	609.928	365.591	92.4909	93.256	96.1054	116.012	108.894	102.706	97.0429	92.3673	95.1703	343.292	505.889	671.286	106.149	100.628	102.451
CD34	12490	84.9147	113.038	92.9098	96.0543	97.3888	88.9031	392.143	375.475	465.12	97.8183	87.7667	98.6785	95.0746	93.7609	90.4081	93.3079	105.103	97.336	332.936	349.191	570.653	95.0966	97.2397	98.965
GPR182	11536	86.3793	95.4779	94.9161	105.753	97.7052	99.3785	748.012	663.517	906.05	104.706	108.107	126.503	96.0917	101.984	97.8349	97.5679	103.891	87.3766	632.003	1173.22	1201.72	134.424	137.658	215.409
ERG	13876	90.0965	89.0787	88.5092	106.358	90.5315	98.5652	605.018	670.684	648.411	124.817	162.755	133.645	87.0878	88.2783	87.451	102.615	92.9397	99.484	737.496	575.511	476.546	119.23	113.052	119.249
ELK3	13713	134.165	149.444	175.968	226.638	279.716	257.693	1326.38	1376.79	1531.77	354.686	382.078	375.368	147.604	156.442	136.13	320.624	290.011	322.549	1354.89	1244.84	1326.38	356.092	407.154	425.972
C130078N17RIK	#N/A	91.1652	89.3136	96.7192	100.002	87.3355	98.9186	344.571	366.81	296.467	91.3728	96.3236	97.4015	91.7149	96.4509	102.393	97.6534	100.27	90.2736	424.546	354.582	455.671	96.1961	92.9449	98.5127
D230050P06	#N/A	87.2848	92.3273	86.0425	86.942	83.4143	91.4261	301.499	400.393	288.616	92.7044	87.3492	90.2104	76.8341	91.213	89.5807	90.71	90.0587	86.7184	364.767	302.554	311.17	80.557	100.433	88.4249
FLI1	14247	87.8275	120.113	98.2864	227.178	105.36	172.253	1574.54	2112.64	1886.82	548.218	529.217	445.283	103.033	154.844	108.306	230.343	116.116	184.304	1618.68	1891.27	1753.88	445.283	389.601	370.447
SLC7A1	11987	98.8634	94.8258	100.646	124.222	104.771	116.83	440.48	406.557	381.446	98.8634	111.696	108.492	109.294	98.4442	107.135	116.883	110.491	111.235	350.745	454.159	419.302	105.441	106.63	113.957
PROCR	19124	91.1928	109.747	109.13	99.9136	97.5275	91.3363	587.712	499.041	578.136	123.765	112.406	128.395	89.6171	98.2318	94.2679	103.321	99.3059	98.354	602.178	437.545	558.555	126.774	122.548	155.699
LOC100048583	#N/A	92.9709	96.3503	86.9538	134.291	107.214	128.749	630.149	561.716	534.32	89.6646	89.0304	89.2719	142.128	111.863	86.8629	192.094	119.511	156.255	1263.45	1307.67	803.311	100.078	105.681	98.2266
MFNG	17305	163.163	122.346	104.572	118.551	96.6041	99.4791	935.283	1004.91	1017.22	90.3635	88.8292	94.1863	261.277	327.917	321.007	95.0373	90.765	100.49	913.641	1161.97	896.262	98.7882	88.4465	92.4252
LXN	17035	157.793	156.777	141.959	131.124	136.879	118.846	485.417	426.359	528.184	123.758	112.914	153.325	108.13	104.027	125.484	125.537	121.057	116.275	435.815	432.512	526.591	126.042	127.085	126.042
E030010A14RIK	226040	115.859	115.421	109.957	115.286	98.246	103.793	318.549	480.529	366.81	100.695	98.8705	100.534	102.894	96.9011	113.536	96.8985	106.228	99.2303	311.223	466.776	428.587	105.429	101.005	105.285
MYL4	17896	128.964	123.089	108.117	109.666	112.676	125.315	565.756	423.437	483.777	123.928	104.209	141.989	148.399	149.785	122.032	124.024	101.661	119.419	526.298	487.172	532.01	139.789	124.586	157.977
PTP4A3	19245	110.461	101.596	101.171	96.8538	90.6258	96.1609	358.936	301.541	348.645	89.4882	93.4686	99.0254	101.356	97.5824	106.544	102.644	107.776	106.427	539.493	372.164	422.843	103.609	106.38	113.784
PRDM1	12142	94.5152	83.2739	91.7853	90.7226	90.1326	94.6992	310.296	493.67	302.931	97.2073	90.5114	90.183	92.3008	100.449	97.3814	112.028	97.3856	95.7536	481.299	327.996	296.668	95.8046	90.9668	95.0113
SPOCK2	94214	162.801	133.645	132.706	144.493	117.891	114.777	1350.46	1683.54	1238.36	200.461	203.691	163.955	468.586	209.603	287.062	96.5802	132.866	126.297	1781.6	1694.35	2335.44	128.789	192.837	204.649
ENTPD1	12495	86.6863	89.8562	89.1332	95.304	96.3645	101.596	327.224	304.987	455.671	96.9789	100.402	103.351	93.3495	96.8089	93.6024	102.668	88.9982	95.6494	407.535	533.551	534.767	107.878	109.395	116.275
PRKCH	18755	181.739	156.318	152.459	102.216	95.1843	101.894	719.208	499.678	474.235	108.401	106.603	119.591	125.442	128.265	114.733	108.988	97.9674	100.923	696.589	551.691	523.282	106.561	102.347	98.7135
GIMAP1	16205	162.301	164.686	142.173	131.213	190.108	138.091	521.771	734.098	1040.17	180.163	171.594	168.91	166.69	140.014	140.027	191.663	130.254	148.551	585.392	590.305	857.72	200.108	191.974	129.646
BC030183	230766	102.299	107.54	95.2898	114.733	109.478	105.216	362.233	305.943	340.255	108.049	99.8594	102.654	102.094	95.3245	90.5496	105.947	112.741	102.216	303.937	296.869	424.69	99.5162	111.264	111.895
BC011467	#N/A	164.015	131.384	142.201	97.3856	94.8433	92.094	579.29	533.08	423.196	97.749	96.488	97.6863	131.145	121.14	163.117	134.313	104.759	103.754	565.02	782.681	641.155	95.4252	93.0439	102.83
PCDH1	75599	147.194	153.415	143.44	165.773	149.433	172.687	624.544	706.157	659.856	132.123	112.555	113.008	182.142	149.358	190.172	179.607	192.279	185.445	489.687	565.02	730.596	104.209	115.181	101.392
ASAH3L	230379	628.868	638.073	596.981	211.729	342.34	169.442	1974.33	3090.28	3465.45	390.115	318.696	266.941	372.914	676.311	456.009	389.701	777.113	185.66	4279.67	5516.82	5003.77	261.689	402.291	264.551
BC028528	229600	140.366	168.078	153.301	257.113	182.978	261.331	1696.07	2154.61	1935.37	669.188	613.972	650.145	142.537	161.83	94.2605	297.501	332.996	303.227	2049.79	1981.49	1941.95	619.469	582.193	547.378
MYO10	17909	155.516	149.83	136.818	175.916	149.276	155.96	537.604	543.045	445.606	125.137	142.173	123.719	162.505	150.911	144.537	165.489	161.809	148.167	518.71	478.688	501.806	159.989	175.68	149.847
LRRC33	224109	112.341	116.659	105.588	120.819	126.924	143.309	501.469	503.624	677.547	108.996	106.91	132.475	127.33	116.898	125.152	163.789	138.321	159.546	414.867	545.291	728.541	114.049	116.875	116.686
ACVRL1	#N/A	95.4118	93.9846	92.0211	107.142	108.005	110.718	313.574	328.272	280.336	106.618	101.792	94.7615	90.235	92.0769	94.5492	96.6719	102.668	109.518	380.267	488.637	357.5	92.6196	91.2307	90.7897
HEG1	77446	112.808	119.189	126.724	184.054	139.628	173.397	602.912	653.253	638.65	193.283	204.588	225.927	135.728	151.788	146.363	228.068	136.513	203.586	699.214	926.78	720.248	208.699	216.86	238.152
2810025M15RIK	69953	301.833	324.515	395.422	463.373	352.8	525.868	1472.76	1488.03	1798.76	297.424	265.739	366.271	424.027	462.916	460.368	380.267	348.526	439.935	1317.57	1361.92	1760.88	296.869	248.003	339.292
SLC9A3R2	65962	142.877	124.075	128.848	161.662	133.161	166.871	750.835	709.783	589.86	177.101	159.904	195.8	114.049	118.304	139.425	174.876	143.98	131.36	842.989	1376.79	855.653	205.521	219.031	236.685
CTSA	19025	116.859	113.432	110.354	135.779	111.579	107.866	581.446	468.43	489.687	140.558	137.474	140.207	123.374	122.988	120.687	154.448	108.073	138.649	638.96	540.803	601.475	182.386	149.968	188.759
RASIP1	#N/A	92.2878	94.1428	88.2651	90.0808	89.718	89.8337	281.887	236.546	269.64	92.2774	91.0525	91.3066	89.6646	94.3794	92.0451	89.4773	90.3093	90.0645	268.026	286.801	340.629	95.6439	87.4054	88.2651
ECE1	230857	310.975	355.261	324.895	396.484	366.271	436.929	1080.25	1285.14	1296.47	294.606	273.826	236.037	329.283	314.269	323.27	342.34	392.066	393.257	1217.65	1456.07	1634.15	266.941	252.61	256.175
SH2D3C	27387	129.262	118.639	126.516	103.226	137.799	113.432	425.703	410.055	439.65	114.882	112.461	109.492	101.386	131.875	112.71	132.123	167.381	120.868	444.207	622.934	461.058	100.011	121.429	119.774
PCP4L1	66425	347.371	286.052	302.931	115.474	90.8538	92.8905	1193.52	923.013	863.454	189.079	156.566	192.036	132.426	165.409	144.024	134.153	103.351	131.082	1661.76	1445.09	1403.2	284.205	274.248	355.335
TMEM154	320782	92.1989	101.803	92.144	98.4934	116.391	103.158	662.646	433.366	449.515	113.142	96.6985	109.216	92.8366	101.914	107.279	104.918	82.3944	88.4646	279.592	446.204	397.19	112.449	109.977	114.625
ARHGAP25	232201	97.6922	95.8046	91.9907	104.189	106.824	95.5441	327.514	319.176	365.018	94.2207	92.6196	94.8002	99.7362	97.4825	92.4479	97.9801	93.5565	105.413	327.996	255.264	274.203	96.1485	96.6819	103.283
PARVB	170736	83.5838	89.5186	92.2585	91.6921	93.9205	94.6371	232.705	413.496	326.144	91.4065	91.3728	97.275	87.1524	95.2938	95.5537	95.2166	84.6171	97.5275	328.185	327.795	352.948	87.5901	95.2475	86.527
SLC3A2	17254	357.009	353.738	281.503	565.918	483.64	489.454	1913.95	1762.53	2352.97	497.498	455.028	374.432	544.954	455.207	450.919	592.469	524.36	549.45	2115.76	2765.48	2666.66	741.832	699.777	598.546
MSN	17698	94.5713	97.2271	91.7918	198.335	199.444	182.771	696.854	800.778	630.475	157.569	129.028	129.699	118.288	116.931	99.7123	267.54	231.731	219.908	656.223	717.985	790.604	119.502	121.712	121.693
SLC6A6	21366	777.113	829.467	699.51	613.383	636.989	556.298	2013.07	2049.79	2103.67	857.233	711.147	737.118	579.29	553.194	517.669	646.245	519.599	617.879	2297.01	2938.44	3030.73	698.776	582.476	784.52
TRP53I11	277414	105.221	121.826	109.055	95.3501	102.166	98.3763	332.487	419.883	346.66	123.48	117.586	136.635	112.228	114.599	109.229	97.0065	115.354	98.1578	320.624	711.408	434.252	118.319	126.311	112.369
KANK3	#N/A	96.988	109.402	96.6143	99.3113	95.8717	98.354	274.848	326.87	323.872	103.666	99.3785	94.3174	99.8419	91.9907	94.8999	103.493	117.576	94.704	330.23	300.934	332.936	111.359	105.429	112.654
ZFP366	238803	93.5729	103.853	100.994	108.953	99.1029	100.886	382.078	321.007	380.539	100.084	100.017	102.823	94.1428	97.92	101.661	102.544	118.956	99.9675	336.908	276.333	334.534	98.3353	99.5685	99.4242
KDR	16542	93.7863	91.0525	90.4144	96.1485	90.3903	94.926	542.511	414.333	452.461	94.3395	85.7394	88.1756	129.743	162.801	179.919	94.5605	87.066	95.0161	750.49	459.229	531.432	94.1554	93.1364	101.629
ADH1	11522	89.5255	88.1128	98.263	97.0289	89.2357	88.4061	606.254	782.968	677.925	132.396	105.992	127.092	107.506	111.831	139.071	84.6171	92.9931	89.0621	347.05	317.885	506.819	96.2082	100.002	99.7573
USHBP1	234395	91.3066	95.1985	91.3503	82.599	97.821	88.6691	537.968	458.916	223.545	85.5303	92.0267	96.8232	79.7439	87.5901	92.4856	92.8518	84.6714	87.052	397.349	523.851	238.198	87.2365	90.1606	97.3888
GCAP26	#N/A	241.586	186.778	228.821	193.685	111.458	132.054	1856.73	1492.55	1423.02	288.247	231.126	320.555	625.452	537.033	572.874	101.088	124.738	113.699	2435.7	2112.64	2586.56	341.717	279.78	418.041
HLX	15284	87.2981	100.078	84.804	85.447	96.295	97.5723	265.558	324.029	240.208	92.4601	89.1962	88.5738	95.2126	93.4007	92.8414	96.7633	95.429	88.6398	247.304	226.474	257.976	92.119	87.3766	87.1135
HDAC7	#N/A	102.226	109.94	95.499	109.055	103.837	105.158	368.566	363.017	331.817	142.643	147.893	118.74	110.783	121.504	108.619	102.21	107.804	100.354	365.412	430.448	381.943	130.632	132.907	130.605
NOTCH4	18132	117.673	166.562	133.104	168.36	106.281	137.658	1212.76	1157.46	929.532	157.58	185.05	151.825	119.807	145.931	137.552	143.373	168.018	132.351	1010.71	1471.49	1054.96	221.204	418.132	189.82
ARHGAP27	544817	103.497	93.8909	98.0256	95.3137	89.9753	83.8854	271.502	259.889	244.139	91.3139	88.7277	89.6579	99.722	99.2543	103.858	84.4897	89.6238	90.7608	319.019	357.83	232.306	83.0503	93.5777	104.68
PLK2	20620	758.719	819.79	408.241	604.641	559.026	437.216	2147.62	2421.11	2160.82	238.917	338.63	410.055	822.463	797.861	455.028	888.354	528.803	536.362	1949.88	3161.8	2122.51	444.462	557.701	584.688
LY6E	17069	182.081	162.08	164.084	109.097	101.205	113.665	654.384	801.525	597.691	135.601	131.073	158.671	213.1	248.54	272.512	111.269	128.779	138.685	795.099	878.452	923.013	148.04	146.852	170.006
E030030K01RIK	#N/A	319.019	327.996	222.546	616.897	558.797	437.838	3059.3	2852.43	2076.31	511.04	364.45	379.074	868.822	613.383	570.129	239.845	452.286	317.115	2480.57	2991.99	1898.2	506.628	268.453	293.629
AOC3	11754	409.937	205.179	239.247	137.488	95.7883	229.706	1382.83	1256.44	1415.48	216.803	171.764	249.959	122.548	182.936	99.5685	369.989	302.21	578.646	1531.77	1413.32	1440.27	400.731	284.461	489.996
EXOC3L	277978	95.7781	100.02	94.5152	111.154	97.0331	101.182	323.631	420.169	328.185	93.355	99.9253	95.6527	92.1308	96.0966	99.2452	94.5391	104.914	92.5367	251.937	374.355	281.218	98.1629	97.942	116.039
ARHGAP18	73910	110.977	102.171	123.069	131.345	130.204	140.027	573.513	425.2	626.735	123.585	124.657	119.675	108.224	130.214	133.816	162.566	161.545	142.986	352.873	507.458	544.388	144.098	142.81	126.627
GIMAP5	317757	88.2232	90.0054	90.0965	85.2968	87.1002	85.7023	200.139	310.166	267.733	85.1955	88.9388	86.125	85.7213	87.9557	85.6779	86.1095	89.862	88.9307	286.147	365.507	290.847	92.2275	92.3166	91.4504
MAPK11	19094	97.6671	97.0605	92.338	181.939	144.346	133.861	632.872	719.208	532.01	107.495	129.188	103.411	92.6783	99.1789	88.4061	140.381	161.113	157.413	474.565	497.084	389.268	98.182	103.211	106.624
GNAI2	14678	331.725	310.739	389.374	524.845	366.81	527.766	1173.22	1290.78	1367.98	325.974	335.246	366.931	312.291	342.248	495.328	452.286	374.859	560.026	1323.08	1628.3	1425.27	418.466	360.803	470.62
PDE2A	207728	86.9678	91.3028	93.1008	93.2677	90.951	100.561	224.488	310.296	345.564	98.9303	98.2211	88.4154	85.9668	107.279	88.1405	100.567	95.6837	97.7744	339.943	456.272	418.573	92.7764	93.1481	90.765
HSPA12B	72630	92.5708	125.161	120.029	178.338	167.381	231.164	1014.53	1416.64	1317.57	450.741	409.241	447.1	118.349	105.335	110.948	231.093	240.747	234.54	1366.8	1470.13	1624.97	353.285	486.363	480.996
TRIM47	217333	87.931	86.6707	86.4491	89.3053	94.3214	94.9557	356.422	358.829	336.508	83.6777	90.1102	85.9131	96.8985	93.0394	93.8909	119.807	94.3174	86.9782	293.629	249.854	449.365	80.8506	83.6777	90.892
LOC385626	#N/A	102.183	97.3126	98.0536	160.201	107.725	132.623	364.673	399.546	351.213	148.5	138.951	147.879	95.6897	128.384	106.267	140.996	160.98	143.411	492.42	582.751	645.967	128.62	120.981	168.595
FMNL3	22379	123.87	128.52	132.558	156.649	174.345	176.971	428.997	407.154	381.193	184.278	186.143	182.467	129.068	121.931	117.821	183.312	185.159	165.644	508.554	477.192	540.053	172.091	171.49	182.188
LRG1	76905	127.312	128.805	108.886	106.509	127.795	113.355	707.118	471.927	295.969	103.709	110.348	115.462	138.996	138.598	101.799	127.771	124.431	144.583	1104.97	816.869	841.382	125.781	125.621	139.656
LRRFIP1	16978	109.247	113.919	98.5171	106.169	113.092	92.0721	287.36	281.819	300.642	124.309	115.055	114.021	96.6143	94.6223	95.1455	112.355	108.277	106.607	254.158	342.382	287.151	119.608	114.697	123.585
BC004728	207818	130.605	115.087	138.308	124.888	102.37	105.844	464.313	286.268	379.706	97.6052	95.3838	92.9155	118.435	103.148	100.573	140.366	128.206	130.314	430.096	353.191	484.549	104.115	109.119	118.128
ZFP69	381549	134.845	147.59	126.342	114.766	125.239	119.17	357.105	621.946	359.537	107.287	123.719	116.153	107.376	125.02	114.704	101.505	135.792	114.294	384.236	585.838	300.171	108.814	117.865	104.848
ABCB1A	18671	92.1936	92.1936	90.1326	95.4626	99.2828	96.7789	246.138	219.587	201.611	89.9976	88.1839	90.6666	85.2374	90.1326	85.1041	88.8714	92.2212	86.5142	318.239	258.959	307.599	83.4586	90.6666	93.5084
LOC329416	#N/A	92.183	88.0857	92.5708	86.7462	94.5568	99.1934	301.316	258.784	331.237	90.2521	87.6284	91.0465	96.416	109.632	104.178	98.6729	91.9705	105.26	301.065	222.367	325.892	95.8812	92.906	93.5447
MFGE8	17304	992.389	919.05	751.197	641.155	533.395	694.268	2938.44	2741.39	2793.63	1220.22	1013.25	1246.24	1243.1	1365.97	1365.97	1015.77	720.845	912.505	3473.38	3006.07	3943.57	1058.86	959.871	1141.96
PTRF	19285	177.178	150.434	122.418	140.027	123.998	129.699	445.125	596.032	544.954	148.721	147.698	201.645	143.147	145.846	152.218	216.972	174.367	174.345	625.244	624.785	722.502	186.554	166.625	222.666
6430548M08RIK	234797	147.412	132.417	126.594	184.851	220.396	178.5	626.206	513.032	560.026	108.492	115.045	125.251	219.492	257.471	209.827	189.54	195.755	183.934	513.032	819.248	661.877	141.687	136.525	155.877
5830458K16RIK	#N/A	98.3584	90.7838	103.306	90.8381	93.7976	97.3773	251.41	231.582	267.104	91.2347	92.4601	92.9599	118.359	95.227	108.219	117.852	100.312	90.1684	992.389	566.935	386.641	99.9136	96.4453	92.6837
CAV1	12389	114.344	107.406	109.77	98.5598	86.6863	102.415	1732.34	1652.68	1609.26	486.997	303.086	530.699	117.136	145.921	208.931	144.913	101.48	136.539	1299.38	1788.66	2000.35	504.507	664.769	638.073
LOC385791	#N/A	89.1813	88.3609	89.9348	94.1554	85.2756	91.3297	339.043	291.97	274.389	94.5349	90.6339	94.6809	89.6961	92.119	90.5251	99.6636	88.0534	91.9705	193.616	229.003	218.041	94.3634	89.3554	89.718
PTGIS	19223	102.942	114.021	118.67	97.5723	92.5664	93.3011	682.47	663.241	795.099	117.298	137.541	142.601	185.188	176.607	150.305	93.826	113.884	99.7411	358.829	600.772	804.829	145.921	145.597	159.412
LOC100040462	100040462	90.5869	92.6704	89.4773	112.293	109.408	105.309	454.318	435.923	275.328	90.1326	88.7558	91.0525	122.856	96.927	91.5932	142.295	134.541	134.584	1024.84	651.699	541.182	100.232	98.2598	100.7
SLC39A10	227059	140.584	157.695	208.598	206.07	198.031	246.098	497.82	544.642	642.544	193.773	231.164	242.38	146.813	186.113	211.111	169.204	184.876	232.824	589.402	644.308	674.264	192.545	206.163	257.918
ST8SIA4	20452	89.9001	95.4693	100.334	156.74	117.412	154.072	720.845	904.396	1073.52	187.062	230.864	320.339	102.446	114.039	97.2659	109.721	107.878	160.678	946.032	894.708	1089.17	208.957	324.093	374.859
MAOA	17161	196.934	195.163	239.886	319.222	298.723	341.342	1102.34	970.614	1151.56	301.601	312.532	407.727	156.875	196.431	237.359	316.669	361.141	288.373	1374.24	779.856	1312.97	233.613	270.476	319.176
TMEM204	#N/A	88.0534	104.299	96.8703	191.175	111.889	255.337	1641.86	1798.76	2013.07	599.179	837.768	854.694	89.3739	138.403	94.7615	173.669	230.914	267.163	1626.69	1979.24	2009.14	611.652	744.464	557.701
CLEC1A	243653	96.0188	94.975	91.2715	94.4736	94.5919	95.0475	339.154	497.362	455.366	116.095	120.037	141.454	91.1426	95.222	99.2303	98.3501	95.1924	96.6357	268.453	397.805	347.799	110.18	122.828	124.292
LOC100045567	100045567	137.561	147.456	164.568	128.395	127.111	145.798	384.524	326.035	444.331	128.476	111.471	132.19	124.14	124.888	137.216	142.731	127.239	152.157	392.992	600.298	407.056	172.04	155.45	166.096
LGALS9	16859	89.5681	87.8014	91.7424	93.4508	87.0755	94.7867	306.576	380.686	329.343	97.0429	92.5613	90.5991	108.852	91.645	92.183	114.21	116.304	102.782	219.751	425.847	408.825	95.6202	90.1684	95.7144
ATP10D	231287	94.2319	102.988	116.875	93.0206	100.766	104.316	267.595	279.043	368.854	104.251	101.446	102.176	111.216	142.103	142.128	116.691	125.702	117.106	268.392	377.423	477.192	109.869	108.277	126.724
EMP1	13730	2313.04	2186.48	2151.68	1281.9	948.205	877.057	5667.17	5810.83	5516.82	1749.8	1941.95	2476.43	2775.13	1938.96	1903.07	2938.44	1907.22	1605.14	6752.96	5754.24	6506.63	1901.18	1551.19	1923.98
MAP4K2	26412	266.095	242.38	152.754	232.824	234.295	135.24	1072.7	863.723	732.897	285.348	253.953	161.853	222.701	263.508	163.882	319.815	227.394	153.039	1029.37	1088.67	599.738	308.331	297.088	157.731
TM6SF1	107769	117.665	113.57	121.894	205.551	153.325	202.593	773.988	749.009	792.979	94.9407	120.417	141.657	340.433	257.245	219.784	166.96	158.375	212.804	636.011	1248.13	756.317	102.121	109.887	88.9388
KCTD17	72844	301.951	258.508	277.513	484.197	367.454	431.346	976.035	978.848	975.358	388.297	304.465	357.83	301.16	313.113	316.126	444.207	497.498	479.009	1046.31	1026.84	925.84	336.333	354.268	374.266
STAP2	106766	121.972	95.6655	105.165	109.776	92.7904	98.8757	445.477	397.59	277.806	94.2319	98.3862	92.4252	137.879	149.307	127.434	98.8436	140.789	90.316	279.095	390.61	305.782	107.235	103.897	97.3075
TMSB4X	19241	1782.83	1738.39	1709.31	2328.64	2048.06	2342.16	5289.97	4972.32	6149.27	1209	1026.07	1234.84	2380.93	2425.53	2232.57	2524.35	2425.53	2484.7	4948.23	4689.55	5090.57	2071.9	2115.76	2313.04
TNFSF10	22035	83.3648	87.3629	90.174	88.5294	88.1229	87.88	185.928	277.589	206.421	90.1969	89.5807	80.0988	86.4211	88.3386	90.3427	81.7682	92.2705	90.9317	195.025	171.971	223.937	91.3139	88.6691	92.6416
OSTF1	20409	466.776	330.101	378.186	465.771	242.106	424.879	1141.96	1107.65	1217.65	218.276	162.095	206.865	423.437	336.223	427.895	500.35	430.957	594.737	1097.91	1364.95	1419.38	279.465	180.632	283.7
NRP1	18186	118.824	131.082	155.405	401.064	290.995	368.566	1734.45	1666.87	1543.4	598.709	493.29	584.007	164.084	167.895	120.478	435.675	252.041	348.302	1979.24	1808.61	2060.61	836.064	743.496	777.573
PCDH17	219228	424.784	379.361	490.306	448.402	507.458	390.381	1919.2	1387.14	1835.5	752.326	422.237	491.585	612.348	431.846	516.911	657.912	499.041	349.536	1896.58	1685.84	1720.62	347.227	261.481	348.422
HPRT1	15452	369.033	330.961	344.034	407.154	369.779	411.203	1069.06	801.183	997.287	309.724	260.438	341.559	326.87	368.752	315.03	436.035	412.369	433.972	902.499	832.068	1014.53	304.856	260.801	312.139
AKR1C14	105387	98.7325	90.6144	88.1487	91.1266	91.5666	89.3302	325.892	253.745	287.562	100.926	114.956	109.734	87.8699	90.4741	89.5255	96.5553	92.8842	95.3075	512.484	355.13	414.431	111.883	139.708	127.092
GVIN1	74558	88.1756	90.2521	89.2538	97.4598	91.3935	90.1684	278.409	273.398	177.101	88.9982	85.88	87.3629	91.5932	89.7421	87.572	97.8573	87.1524	95.6022	443.382	324.167	287.261	89.862	91.7424	92.5708
TAGLN2	21346	90.8381	97.3192	93.8676	130.704	112.555	114.543	405.105	365.129	477.192	97.0331	100.209	108.886	101.381	98.3301	94.6267	202.558	168.735	166.096	538.781	531.093	525.542	117.248	105.436	116.116
PPP1R13B	21981	108.87	110.11	112.751	124.213	98.2898	112.124	281.17	303.658	236.604	118.566	119.466	118.824	132.203	124.707	122.846	102.313	114.021	109.651	472.419	268.281	282.953	113.267	104.93	120.147
SEPT4	18952	98.263	104.377	105.216	141.375	116.168	155.857	458.3	365.412	564.119	118.281	123.856	122.978	109.251	113.031	113.986	196.038	174.7	204.249	461.301	531.277	587.504	154.886	184.611	155.766
RASSF3	192678	316.745	244.139	293.793	299.092	256.432	308.024	1253.56	1306.41	1654.29	447.1	477.046	555.457	493.85	471.423	577.536	304.465	274.522	362.86	1275.97	1143.38	1756.06	592.052	540.283	640.107
COPG2AS2	54158	123.205	118.647	109.326	183.49	163.143	195.025	1150.69	1320.61	1061.12	154.938	147.845	135.987	448.033	225.262	206.478	171.21	162.716	136.488	1199.66	876.253	800.082	163.751	116.429	148.488
SQRDL	59010	103.283	104.936	106.474	104.377	105.715	124.318	268.076	401.933	483.87	110.069	92.9822	110.903	117.658	127.89	146.286	112.441	130.715	127.447	284.328	274.797	439.65	126.567	120.428	150.6
RALB	64143	355.514	370.161	492.26	413.184	405.347	549.271	980.084	982.22	1287.59	426.104	331.725	440.48	297.274	331.523	302.805	405.247	397.285	526.024	974.311	1183.83	1052.94	272.512	295.387	372.818
B230365C01RIK	#N/A	329.343	373.423	333.86	512.653	610.115	493.29	2817.08	2786.13	2476.43	721.865	568.516	515.029	1201.72	577.536	485.417	426.509	289.073	370.521	2985.59	2631.58	2129.83	692.607	446.363	342.45
9430028L06RIK	225617	157.533	135.673	115.191	139.813	106.42	101.853	1215.93	1237.35	1023.26	421.652	410.922	289.073	194.407	175.353	148.136	120.337	109.041	135.468	968.099	967.478	745.915	221.287	238.267	153.207
TNFAIP1	21927	761.233	844.914	773.663	717.704	680.725	749.84	2266.95	1970.75	2142.84	817.591	802.296	733.47	631.566	925.84	775.992	896.262	1109.53	731.147	1938.96	2712.85	2581.64	689.189	737.118	954.177
CD97	26364	88.9227	94.2924	96.8475	99.4742	105.135	99.6682	387.524	263.849	276.548	101.162	125.93	113.25	88.4154	92.8971	93.551	151.078	112.028	107.479	357.186	302.732	365.507	121.256	131.839	121.513
ENG	13805	94.1554	91.3935	94.216	92.4389	92.5412	102.818	203.657	209.569	249.604	95.3887	106.12	94.0621	86.2494	90.5558	90.7018	91.4413	96.666	101.872	266.287	342.912	361.511	117.305	99.0711	104.695
RTP4	67775	121.045	123.007	125.668	97.5511	112.856	104.6	292.749	332.766	318.02	131.036	110.261	97.0758	168.686	121.686	123.432	137.488	117.365	117.256	1179.58	690.594	447.266	123.812	113.319	105.84
COL4A2	12827	374.732	302.866	236.217	678.502	598.709	610.115	1397	1689.39	1411.58	513.833	382.817	394.973	352.733	392.59	328.721	745.066	691.06	806.877	1500.54	2029.33	1954.08	681.659	633.686	554.889
9830005G06RIK	#N/A	89.0876	91.8507	92.0022	90.5869	91.0589	94.087	223.861	264.849	356.916	118.535	111.403	115.628	89.1031	96.3503	98.8848	90.6339	84.804	87.6542	247.374	509.451	288.113	95.2307	100.761	129.461
SIAT10	#N/A	112.348	92.8518	104.701	101.717	95.8993	115.538	336.908	273.268	223.254	112.872	111.011	103.389	116.417	98.0674	113.013	102.44	100.653	97.7972	282.007	255.742	294.875	125.239	122.933	129.482
LOC100048307	100048307	106.45	97.5125	102.183	124.318	90.6902	134.007	505.494	546.312	450.586	139.055	159.412	143.606	105.007	115.324	101.409	113.203	125.304	129.063	389.512	394.383	423.708	161.439	222.984	226.231
CYYR1	224405	86.2494	88.0403	86.5142	90.1908	88.0024	88.6604	168.378	190.968	198.688	84.8337	90.3427	92.1126	84.8337	82.599	94.7743	95.6073	97.8136	85.1719	173.728	199.946	200.166	93.3779	85.9668	87.2499
VWF	22371	89.0703	84.6171	90.5631	104.125	89.4882	88.4646	200.715	241.347	179.087	86.8346	90.428	88.8914	93.1364	87.3944	92.5919	88.4646	86.5376	95.9552	248.778	365.018	272.416	92.8024	88.7415	87.3157
RAB11FIP5	52055	267.867	224.624	260.734	349.103	235.057	321.87	984.861	1005.46	886.233	460.093	359.901	468.682	389.601	408.726	448.68	423.437	241.138	297.149	900.79	802.977	1012.49	387.298	368.95	411.203
PPM1F	68606	101.567	105.523	107.385	157.99	183.132	211.401	475.311	361.787	417.156	197.208	199.897	173.811	97.0065	117.314	116.947	138.598	176.413	190.712	417.538	441.855	462.516	181.718	204.318	154.785
EFR3B	668212	144.422	143.81	163.653	146.228	117.428	144.713	488.985	412.112	412.602	101.107	130.123	113.742	174.345	155.366	132.528	241.312	122.075	180.139	671.286	606.98	511.836	145.582	111.863	116.321
LY6A	110454	97.6213	105.641	102.519	135.542	123.076	108.283	467.553	252.409	396.807	127.846	115.331	119.212	118.496	98.8436	113.104	148.029	127.412	105.098	691.414	587.313	756.008	140.207	105.143	119.212
KIF26A	668303	94.6173	97.6341	105.227	87.839	101.331	98.2731	436.148	415.655	399.845	98.691	104.706	104.701	94.4329	99.6026	123.749	95.1655	111.444	96.1325	210.545	654.384	368.057	99.1934	100.253	113.104
HDGFRP3	29877	122.329	127.661	137.809	141.803	122.571	138.555	326.55	317.407	314.962	110.977	117.379	129.142	156.06	170.073	170.158	143.429	118.4	137.206	301.601	289.183	342.145	105.731	111.702	108.032
PP11R	19011	89.5604	85.2968	88.2368	99.2215	91.3728	91.3935	353.285	380.807	233.807	92.6704	92.7818	93.9575	88.6691	90.0965	96.9067	90.4666	94.5861	90.945	345.648	352.324	289.394	137.601	103.446	105.423
CNN2	12798	134.036	150.6	118.864	137.025	163.416	157.672	332.699	354.686	539.336	132.054	191.691	157.99	163.163	141.212	137.061	120.611	178.087	180.741	518.204	343.479	364.933	193.616	191.029	195.891
SNRK	20623	231.788	271.615	277.433	196.579	234.338	284.684	700.846	627.3	842.052	289.675	336.223	341.41	201.788	262.825	272.08	223.394	310.231	311.114	613.616	1275.11	994.59	330.001	362.233	307.67
SH3BGRL3	73723	765.01	650.919	749.009	708.817	609.4	695.022	1866.31	1611.86	1711.02	574.405	591.503	735.46	952.406	877.839	849.061	628.219	725.218	693.039	1609.26	2145.55	2374.95	877.427	611.652	732.897
D630014A15RIK	#N/A	443.382	405.616	424.879	273.903	305.13	289.394	878.452	828.704	748.695	300.439	310.422	313.272	361.787	318.625	331.725	268.453	343.383	317.407	967.022	1243.1	1057.52	312.633	381.653	374.074
FAM129B	#N/A	221.46	203.201	230.864	271.862	223.861	225.766	562.561	672.418	596.981	182.283	229.096	198.183	290.903	321.08	334.186	233.477	216.172	252.944	627.026	572.489	710.793	279.043	212.92	220.76
DTX3L	209200	108.645	118.442	111.593	199.585	116.957	193.022	376.96	429.485	535.121	163.438	157.094	209.366	109.814	125.11	133.161	224.186	124.228	215.862	426.646	490.476	540.996	156.547	123.774	169.635
SLFN5	327978	89.471	86.9276	92.156	84.9147	85.9987	90.4443	207.812	163.771	190.266	83.7883	94.5096	89.293	80.9746	93.9205	96.2993	96.8475	92.119	97.9382	386.448	321.702	227.791	83.0792	87.2365	88.2368
H2-D1	14964	185.247	163.829	148.183	187.528	196.431	176.944	571.849	612.348	473.535	139.947	148.07	134.688	264.071	222.701	219.55	283.46	275.397	225.857	692.607	668.372	722.735	177.018	156.566	144.287
ARHGEF2	16800	131.113	133.507	114.791	121.712	124.14	113.306	281.503	331.237	236.766	137.799	142.159	120.742	133.761	135.214	118.006	119.724	125.484	124.339	237.209	294.41	253.52	131.79	130.856	121.17
PTPRG	19270	197.923	186.807	229.54	164.918	214.071	193.151	437.075	380.462	418.573	161.83	172.911	201.042	176.607	177.267	175.402	146.764	145.013	155.203	438.503	387.298	416.85	180.578	181.64	200.039
PPP1R16B	228852	95.7006	96.2131	93.153	93.8957	93.0501	94.8214	224.186	248.279	215.481	84.0431	91.8009	90.9668	88.838	96.0411	97.5994	86.394	93.7002	101.828	219.908	168.502	224.601	92.1368	81.5137	99.1085
YES	#N/A	194.245	236.176	235.15	167.751	218.558	246.931	483.111	470.62	519.599	200.075	202.907	231.439	212.638	226.552	215.724	229.87	220.76	241.204	461.058	429.235	486.997	204.524	204.206	259.965
PKN3	263803	424.174	399.845	227.672	341.479	282.539	191.15	1363.44	1359.91	751.706	189.423	311.865	156.669	269.595	370.092	293.053	227.902	391.552	246.377	923.013	1141.96	699.214	163.609	188.784	140.584
TRIM30	20128	86.2693	96.4357	89.8396	113.863	97.92	102.404	190.512	199.318	233.613	88.101	90.8867	79.1423	99.2663	98.7456	90.1606	115.672	87.6013	111.126	209.858	311.17	260.204	97.3926	94.37	85.7394
SEMA6A	20358	182.913	195.516	177.555	142.659	127.177	140.558	321.303	336.448	321.654	143.293	164.543	150.075	120.981	118.366	112.756	131.103	134.488	131.335	416.566	387.776	349.103	168.327	165.531	152.218
LOC100044897	100044897	150.708	137.132	150.18	152.675	158.458	131.745	356.6	264.071	272.243	143.136	149.737	156.914	122.883	132.93	136.388	110.468	111.812	113.972	273.667	336.983	260.333	158.36	141.375	151.567
TPM4	326618	326.55	384.813	305.394	595.589	741.832	608.863	1424.22	1628.3	1696.07	500.486	571.56	517.445	565.618	533.692	414.431	771.254	869.665	723.984	1694.35	1480.16	1584.69	588.941	714.939	549.271
SIPA1	20469	92.9931	93.355	89.4935	121.679	108.311	104.794	204.824	272.948	215.609	100.659	100.989	93.3685	93.8079	92.1871	88.9031	124.707	113.26	121.625	230.431	258.648	204.077	106.306	96.1719	101.236
GNG11	66066	107.168	129.629	120.55	334.08	229.706	367.454	1027.4	950.443	968.743	270.476	328.272	356.015	149.342	135.59	159.582	286.67	325.34	271.689	1004.45	873.452	965.431	401.56	362.048	533.914
TM4SF1	17112	684.285	637.503	654.58	172.585	180.285	189.54	1340.77	1165.65	1158.52	224.233	182.31	283.196	189.262	158.245	147.425	306.194	354.686	397.19	1546.92	1375.66	1501.7	596.981	395.08	708.817
TMSB10	19240	1089.17	1176.09	1132.14	769.171	620.118	767.959	1921.36	2032.74	2357.09	856.9	991.289	1130.67	780.505	966.601	932.248	690.084	761.526	787.782	2236.13	2280.16	2163.57	996.285	887.827	1023.26
D230007K08RIK	#N/A	147.437	161.695	197.242	164.749	166.096	174.052	755.556	728.922	609.694	247.948	180.662	266.716	222.579	154.627	145.099	124.854	125.772	143.359	537.429	718.287	435.112	263.673	209.438	207.93
DLL4	54485	99.5816	89.0522	89.5519	92.4786	91.9288	89.9169	347.3	251.466	162.316	86.3793	90.9727	89.1514	90.6339	89.293	93.5026	90.8089	92.0721	89.8	342.006	233.563	220.071	96.0799	86.4839	87.7179
NR5A2	26424	94.7656	92.55	91.3794	96.5985	94.3991	97.2889	310.105	248.085	307.894	92.906	91.5893	94.2046	93.2732	91.3992	88.257	107.645	93.8415	100.393	342.382	175.2	305.943	90.4344	96.412	97.7335
GIMAP9	317758	90.951	103.092	103.935	91.7424	101.111	90.2867	307.801	189.051	186.617	100.172	101.176	98.4166	93.5618	94.975	114.757	91.8928	101.171	94.7091	238.917	213.661	232.038	104.855	104.752	111.925
EFCAB4A	213573	104.356	95.3356	101.413	92.5367	98.0307	91.4816	176.86	193.068	248.457	90.765	96.1122	96.4827	95.1985	100.913	101.01	99.0904	104.996	96.6762	312.978	283.789	253.077	109.229	98.9784	102.638
4831437C03RIK	#N/A	91.7113	86.0731	101.717	92.3008	87.6173	103.609	191.464	204.14	264.719	84.996	88.6988	89.2065	93.6804	92.8304	118.296	96.5031	101.646	102.959	286.455	251.568	358.638	95.0161	86.1445	94.3274
VSIG2	57276	92.8414	96.5075	105.445	88.9579	98.3862	99.9529	264.953	260.438	169.724	87.9129	96.4827	91.9705	86.217	91.5828	92.9822	96.5383	95.5537	92.0686	185.51	354.982	173.849	90.2199	94.4927	90.8455
FGD5	232237	97.821	92.4021	86.0162	116.728	162.259	151.408	347.711	312.633	259.787	92.9599	91.6787	89.8851	90.5251	86.3016	95.1985	131.624	129.142	146.749	341.41	392.272	307.066	93.8511	92.9599	94.6809
PSMB9	16912	101.468	109.549	108.581	146.974	119.397	146.607	302.353	319.661	405.247	111.427	103.51	114.861	111.792	118.855	90.7897	149.815	155.289	188.849	475.765	430.293	434.905	125.752	102.299	120.742
CASP8	12370	160.718	168.91	192.638	151.918	139.918	177.42	324.83	332.936	365.247	133.994	150.259	157.379	178.697	184.437	201.141	204.348	200.775	175.526	504.157	464.867	443.13	138.825	140.828	167.997
RGS3	50780	92.1786	93.8312	95.2989	102.668	98.1629	98.965	204.206	197.242	166.98	105.152	104.949	102.801	91.9404	95.0915	97.397	98.3022	101.005	97.9588	196.699	178.675	190.356	98.4022	100.096	98.4731
GRAP	71520	84.7236	87.2848	83.5111	81.9032	91.0126	91.7587	194.435	209.491	152.735	83.3648	92.3627	82.243	91.5666	82.7249	88.3609	90.917	88.3386	88.1405	146.408	191.747	192.61	89.3211	85.3299	84.5899
SERPINA3H	546546	84.9323	86.2324	88.8808	90.8089	85.2374	91.7799	192.989	149.458	154.886	84.9604	88.7924	92.2521	92.5708	89.9169	92.5862	87.3355	84.9604	94.374	202.783	155.348	225.262	93.0859	91.0465	89.6579
CD40	21939	106.12	98.4062	110.035	104.438	107.172	117.143	294.74	343.292	269.269	118.791	135.888	124.014	99.0141	108.612	100.881	118.39	122.528	116.621	243.759	284.142	247.669	123.73	154.088	133.789
NOVA2	384569	92.2034	90.6339	98.015	94.8698	100.781	98.5802	235.443	270.109	260.518	93.6278	99.0448	94.2411	91.8977	88.0024	93.8569	91.247	99.417	92.0507	222.198	159.04	210.277	96.1768	97.5959	98.691
LRP10	65107	341.41	295.054	351.963	216.423	290.699	285.989	765.01	713.639	811.149	248.989	201.717	248.502	356.345	362.86	399.845	248.419	223.906	253.284	821.294	630.785	798.289	308.411	277.297	321.398
LNX2	140887	452.91	344.905	343.182	220.437	179.219	195.943	784.779	790.921	836.588	312.532	323.481	348.526	466.776	453.447	499.496	199.542	174.3	243.941	922.453	912.505	1040.77	321.362	343.383	364.933
SLC30A1	22782	201.298	183.66	226.198	243.759	232.824	266.45	604.641	426.251	707.44	173.981	188.352	185.928	152.04	179.939	182.89	207.675	197.973	271.502	585.603	558.334	830.693	162.801	136.774	166.171
MKNK2	17347	391.679	358.936	340.255	298.76	313.272	294.997	814.282	821.294	846.968	392.066	388.95	360.945	368.057	423.437	508.554	320.038	240.286	287.466	851.398	795.485	823.426	380.462	392.495	380.348
ARRB1	109689	209.858	192.728	197.748	205.898	216.202	235.672	444.559	561.467	500.187	159	160.62	181.868	223.328	201.582	231.582	221.008	242.202	283.639	471.753	443.576	549.65	146.571	150.29	162.152
SCL0001946.1_187	#N/A	155.466	169.934	133.924	185.694	140.598	197.149	310.821	657.912	324.737	179.009	191.029	142.559	128.316	141.401	174.653	152.253	199.287	173.235	362.381	345.851	342.006	178.697	188.998	164.543
TAL1	21349	90.4777	89.773	105.621	87.3944	90.9957	89.0876	192.874	276.333	170.073	82.9896	87.3061	87.88	82.243	92.4195	81.5137	90.2199	94.4992	82.3118	190.386	164.657	229.003	85.9853	80.3514	89.2985
0610037M15RIK	68395	104.806	103.192	106.458	157.353	137.416	143.068	450.586	435.815	348.865	100.7	89.227	103.951	224.186	107.198	134.653	206.363	119.876	136.13	453.274	453.998	485.011	114.172	101.59	114.406
LOC546723	#N/A	245.252	223.691	197.973	137.966	138.394	179.393	381.311	436.396	404.162	174.488	191.088	179.811	201.042	199.345	205.551	186.04	169.036	160.543	448.94	461.181	449.147	203.289	176.196	196.476
LOC674135	674135	188.09	174.993	164.398	222.769	151.371	177.353	513.398	544.388	486.844	144.127	127.545	149.559	313.638	245.425	237.017	291.565	209.569	194.896	794.408	698.989	548.381	173.849	187.21	178.94
CDC42EP2	104252	103.602	91.3794	117.01	112.477	103.028	138.151	307.951	347.542	214.38	100.534	104.714	128.255	98.0505	96.911	131.565	90.3213	113.104	114.356	407.963	348.014	323.19	94.0924	109.66	110.922
CCDC85B	240514	187.466	160.503	158.962	150.655	145.597	181.345	550.326	590.704	622.41	160.697	155.129	174.224	263.083	210.109	141.918	163.812	222.135	180.018	408.064	683.772	693.634	176.098	156.74	220.03
ANKRD37	654824	207.96	190.968	187.549	177.944	136.749	122.648	439.935	1020.99	705.594	110.213	109.029	120.733	284.142	278.96	254.672	96.0543	110.529	136.195	467.188	597.247	495.158	148.435	153.933	134.023
GCH1	14528	110.869	119.826	101.858	102.313	103.369	88.3173	276.601	251.759	185.487	91.0695	92.6962	91.3297	109.734	102.42	90.1684	98.6308	115.56	101.705	556.9	364.933	250.12	96.8334	93.7609	102.86
DOCK9	105445	121.192	113.778	117.53	181.972	148.889	150.025	345.005	351.394	385.942	135.711	123.539	127.156	169.401	156.06	133.994	176.392	181.442	148.539	281.598	282.883	370.785	126.784	134.815	123.145
RBP7	63954	110.93	112.817	109.299	99.6569	97.9914	95.2572	205.28	177.353	259.664	104.6	107.579	104.189	110.751	113.844	103.846	93.6727	93.3122	102.354	342.534	298.316	432.649	114.807	112.865	104.149
EFNA1	13636	348.106	288.867	223.639	114.855	100.1	99.3743	569.264	677.925	823.426	112.315	105.195	110.285	341.559	287.151	286.086	98.2598	117.19	91.3636	535.959	615.16	788.995	166.388	120.723	140.249
S1PR1	#N/A	165.879	205.784	248.591	101.59	104.822	125.93	471.753	447.566	656.223	109.036	107.707	115.68	88.8914	89.0787	85.0255	95.3838	97.6922	91.1184	417.156	382.221	585.603	94.3274	96.8275	130.786
BC015286	234669	97.9914	84.8337	84.6997	84.113	92.0211	86.125	205.701	150.29	179.658	86.0913	87.2981	89.3695	82.9096	86.5652	85.9668	88.3018	89.9001	83.941	171.192	296.276	240.57	89.227	88.2651	82.599
GOLM1	105348	301.872	275.051	252.718	435.675	398.584	440.363	900.233	833.554	976.619	483.87	487.971	503.433	410.429	344.203	381.066	453.998	494.815	419.158	882.169	984.861	942.364	544.23	428.587	508.773
ITGA5	16402	92.3865	95.1543	92.094	94.5777	89.2127	98.4834	162.354	263.904	161.982	101.024	100.787	93.9313	98.3584	105.25	105.79	98.5757	95.0224	95.7418	199.38	201.107	198.538	95.986	94.0973	94.5048
2900016B01RIK	67262	97.545	108.408	109.51	223.81	177.555	300.497	466.588	573.513	780.227	123.133	151.037	161.28	115.68	120.013	132.866	194.215	169.777	247.062	528.184	965.431	957.619	201.743	305.655	276.485
FAM108A	#N/A	103.58	97.9674	110.043	111.371	98.9406	109.752	228.892	258.959	271.073	98.4483	98.3584	111.725	97.0465	105.285	97.4136	106.916	104.875	117.547	178.721	181.915	240.208	100.775	100.966	101.828
2310066E14RIK	75687	112.694	118.662	108.559	120.723	129.581	120.229	253.847	217.37	228.36	119.353	113.838	111.902	112.66	105.698	106.525	126.658	141.128	120.098	214.452	236.105	265.739	131.802	132.614	97.9674
VAMP5	53620	90.0645	88.7343	91.0695	106.193	93.0554	98.0256	203.796	161.304	207.675	91.8764	91.2527	93.5976	91.5117	87.9682	96.3999	95.6787	96.8538	97.5322	215.896	182.535	248.198	92.9155	93.6336	93.2062
ADAMTSL2	77794	86.942	99.2249	94.1392	98.8889	86.3793	88.3609	222.279	254.609	165.007	85.1719	84.8619	91.7967	85.5303	92.6903	88.7343	93.4686	99.3166	102.787	169.621	212.674	155.999	91.8764	88.5188	102.021
BC039210	234839	112.842	111.052	112.42	115.926	112.985	116.763	290.995	290.995	262.825	115.809	112.834	116.605	122.103	145.56	141.751	128.05	114.386	118.521	220.834	292.628	278.066	119.01	105.635	119.311
LOC100048858	100048858	341.885	421.652	401.56	301.951	267.302	351.491	772.899	802.977	839.28	184.054	226.083	237.623	478.237	482.93	483.111	279.221	328.375	376.303	775.992	731.989	792.131	342.534	403.788	327.842
D930046M13RIK	104880	185.66	174.093	179.068	223.97	236.634	290.146	693.039	591.884	740.619	131.934	154.189	127.729	219.684	311.959	390.989	314.048	360.714	360.239	785.509	819.79	852.495	140.653	134.313	157.301
ETS2	23872	331.18	395.969	426.251	666.922	782.289	583.147	1587.5	2183.06	2199.26	531.432	504.915	489.996	940.211	703.09	793.237	601.683	641.155	458.416	1415.48	1841.71	2363.12	403.3	478.831	499.231
TPST2	22022	209.068	183.714	187.871	222.135	187.913	187.712	573.86	518.074	512.484	193.352	189.288	187.089	221.103	250.716	249.696	250.637	245.016	164.833	753.353	377.12	655.065	219.817	176.127	161.13
PIK3R6	#N/A	94.5824	88.7924	92.8842	101.567	99.8658	97.8679	207.782	219.751	201.471	90.678	93.9014	90.7897	92.7436	102.21	83.7591	100.517	107.468	87.9232	161.426	216.508	211.448	97.221	92.6361	96.7452
CDIPT	52858	335.813	407.625	408.948	246.747	295.196	323.528	642.754	723.073	797.407	256.963	227.319	243.98	370.161	289.499	428.023	241.087	305.331	284.748	657.65	670.684	772.141	325.093	271.19	290.773
LOC100046044	100046044	7484.06	8779.29	9249.56	6265.95	6506.63	5754.24	444.462	661.645	592.688	5112.32	5552.13	4633.86	3121.88	3649.64	3345.02	5894.9	5703.53	5068.65	248.913	427.749	255.742	3756.03	4060.13	3916.97
REX3	#N/A	2900.81	3198.61	2865.54	1320.61	1645.13	1378.97	128.722	183.916	193.376	1492.55	1927.01	1786.43	3102.96	3318.86	4106.19	910.535	1309.53	1041.43	183.916	113.104	132.685	1652.68	1742.22	1989.33
GPC1	14733	2889.04	3095.9	3558.64	1001.64	1131.27	1108.9	105.786	95.3271	108.437	640.41	644.584	750.835	2488.29	3252.45	2616.81	1022.6	913.083	1152.06	139.813	132.296	115.594	856.9	726.005	925.353
BMPR1A	12166	661.877	739.832	795.485	587.313	690.084	726.326	97.2073	111.198	100.449	624.074	545.291	911.892	498.861	512.02	705.594	510.158	546.767	604.82	101.13	98.0217	90.3281	602.659	565.756	614.77
COL9A2	12840	3671.02	4207.36	3054.19	2122.51	1397	1841.71	170.431	231.695	239.991	2786.13	3073.57	2501.05	3977.47	4317.72	3025.2	1263.45	1511.54	1699.47	234.117	261.633	282.183	3813.46	3152.92	2968.39
EFS	13644	686.749	748.012	654.793	1100.14	925.353	804.13	90.7727	114.078	87.1135	987.269	769.875	702.8	782.681	1130.67	820.215	688.119	937.669	935.909	150.86	138.736	95.2938	728.922	824.944	782.681
WASF1	83767	1620.51	1974.33	2089.05	3186.05	2374.95	2695.74	252.277	209.789	233.514	1480.16	1466.61	1490.79	1689.39	2308.85	2103.67	2009.14	2236.13	2581.64	154.037	190.46	197.149	1014.53	1304.11	1342.78
PTN	19242	5170.02	5068.65	5112.32	4333.16	5090.57	4633.86	615.931	908.475	841.007	10384.6	8931.34	9899.85	4508.46	4586.45	4846.55	4689.55	4815.97	4378.41	965.431	1084.6	818.571	11367.7	11367.7	8931.34
SDC2	15529	1060.33	1227.16	1294.43	662.917	596.981	712.709	105.205	106.882	125.529	1039.64	770.204	1292.04	2063.5	2053.25	2846.11	588.459	549.45	874.508	94.3395	111.946	137.729	1580.51	1134.51	1767.56
EG666387	666387	2173.28	2073.32	2163.57	1165.65	1352.78	1187.95	141.918	170.105	111.914	1486.29	1524.32	1229.93	1944.44	1697.72	1725.03	960.488	1129.12	1093.97	113.074	242.25	138.234	1220.22	1250.54	1092.37
D130026O08RIK	#N/A	1340.07	1376.79	1546	880.879	792.131	781.612	121.931	132.51	88.6398	954.713	965.431	778.746	1363.44	1075.25	1057.52	610.7	690.084	590.052	95.3411	163.026	128.51	809.751	804.45	623.433
BEX1	19716	2405.81	2324.41	2410.21	1051.05	1394.9	1337.59	112.082	199.032	222.006	1178.75	1540.29	1571.72	2363.12	2520.63	2560.55	784.1	1027.4	977.791	151.452	110.738	138.963	1493.8	1555.53	1798.76
AW555464	217882	1877.86	1551.19	1708.22	810.001	743.496	734.098	120.955	198.571	132.263	1199.66	1077.07	1011.9	1941.95	2250.29	1921.36	911.041	698.776	800.082	98.6477	137.393	143.324	924.819	801.183	973.685
DOCK7	67299	466.076	459.693	394.256	548.547	518.71	486.997	116.728	110.147	95.1149	551.256	540.996	427.895	470.894	440.664	411.009	555.056	526.298	522.954	112.901	91.2405	97.2609	495.469	499.678	412.832
CYFIP2	76884	1913.95	1629.47	1431.17	748.012	801.183	717.129	132.519	94.7971	147.425	1398.37	1305.37	1381.81	1870.46	1794.04	1623.25	696.589	685.526	748.012	211.054	156.339	165.531	820.975	674.627	824.503
6330403K07RIK	103712	2157.48	2395.57	3084.15	1794.04	1846.01	2494.21	144.394	128.286	224.448	2590.44	2488.29	2959.88	677.547	939.738	1092.37	1477.22	1735.98	1872.55	123.719	159.383	165.879	1987.21	2044.82	1861.72
TRPM3	226025	832.068	871.841	670.306	584.688	591.884	435.675	108.983	114.338	102.031	660.098	583.322	424.784	565.918	566.935	420.054	382.554	410.055	339.209	100.055	108.924	105.158	509.293	538.377	362.86
ATP1B2	11932	917.361	886.619	886.971	567.559	558.555	718.609	173.141	153.018	94.6371	698.776	493.968	579.699	1782.83	2405.81	1771.56	675.272	646.245	936.298	148.721	109.251	115.474	1253.56	962.554	1148.77
ODZ3	23965	413.184	458.3	356.015	783.733	802.296	739.095	98.8114	106.514	86.9276	641.961	638.073	517.084	548.715	559.299	380.267	904.396	910.535	749.84	125.19	119.159	103.379	693.634	563.403	503.328
COL9A3	12841	1046.31	1041.43	1125.33	416.85	358.562	440.48	107.878	107.38	121.026	1130.67	1210.13	1003.74	632.872	681.018	655.959	379.865	391.333	361.141	129.088	102.83	119.025	1583.3	1533.57	1424.22
PEG3	18616	722.115	795.099	760.143	733.47	939.738	706.817	180.182	221.103	165.954	952.965	1218.62	1051.05	934.766	1080.92	982.774	628.868	704.308	612.491	161.893	188.253	172.376	1080.92	1522.2	1142.49
ALDH2	11669	2786.13	2822.61	2933.06	2648.57	3115.97	2857.91	421.941	340.816	306.679	3326.34	2998.17	3186.05	2236.13	1901.18	2366.19	2599.72	3186.05	2363.12	508.306	705.327	411.768	4037.17	4046.96	3508.21
CD63	12512	1382.83	1167.04	1420.53	1286.27	1207.12	1722.63	278.853	396.077	256.621	1263.45	1223.13	1271.63	1419.38	1058.86	1307.67	1394.9	1466.61	1359.91	395.748	363.017	308.926	1380.08	1423.02	1484.87
SRGAP3	259302	719.92	653.993	601.683	366.53	338.712	326.799	97.2659	91.7853	102.576	413.707	431.207	312.633	604.82	550.811	471.294	285.348	315.316	273.718	97.0065	97.3039	90.4666	308.561	282.007	280.298
IGSF3	78908	564.119	467.553	509.141	381.653	277.085	425.098	90.6144	96.5732	104.552	590.052	484.549	561.716	314.188	373.206	402.575	287.008	352.608	422.843	82.6763	90.235	91.865	435.508	426.251	652.51
COL16A1	107581	781.612	688.497	429.235	1411.58	1452.52	790.209	96.2489	132.074	93.7385	1134.51	907.916	601.916	551.519	539.906	354.686	1722.63	1841.71	964.991	112.573	133.937	108.975	1281.9	1111.79	897.339
RBP1	19659	763.502	714.939	938.196	936.661	1431.17	1256.44	123.667	203.623	166.118	1454.77	1300.29	1709.31	1813.25	1629.47	1488.03	1156.75	1566.27	1552.84	245.197	236.002	273.6	2610.22	2690.44	3065.07
RBMS3	207181	1515.51	1346.21	1138.29	1581.96	1269.77	1470.13	255.892	247.758	345.172	1531.77	1369.08	1260.75	1420.53	1311.7	1663.25	1167.82	1251.41	1071.79	208.619	416.978	317.407	1541.45	1506.19	1694.35
GPC3	#N/A	1661.76	1675.81	1626.69	455.671	342.534	531.432	108.581	116.605	99.3059	1340.77	792.131	1253.56	1735.98	1769.47	1997.41	296.205	315.932	381.446	116.335	100.072	104.732	1034.14	873.452	1354.89
BEX4	406217	1011.9	1279.03	1136.71	324.328	466.076	397.008	96.4196	92.1604	107.733	277.853	382.221	544.23	1066.73	1073.52	1119.05	270.729	351.783	373.695	91.7424	102.996	107.974	509.608	537.229	583.795
GSTA4	14860	1618.68	1528.3	1540.29	1176.09	643.063	1090.04	160.606	199.789	161.06	1120.48	1113.96	1380.08	1719.31	1956.21	2280.16	944.263	782.968	1020.5	221.707	257.471	200.965	1538.69	1369.08	1366.8
A830080H07RIK	320526	2907.23	2292.57	2142.84	1456.07	1490.79	1266.61	331.237	179.492	391.333	1458.95	1406.6	1399.91	2066.06	2097.77	1141.96	1747.36	1503.41	1415.48	459.541	446.076	256.238	1300.29	1193.52	1211.79
FAT1	14107	643.693	615.931	716.8	482.93	533.224	468.831	108.753	115.853	113.638	560.23	504.157	523.282	602.659	513.953	551.256	412.458	345.564	457.918	143.691	96.1325	114.19	491.759	386.77	484.549
NDRG2	29811	1560.97	1600.46	1970.75	860.806	969.379	1041.43	109.714	125.11	105.296	387.865	456.99	619.299	1607.09	1356.08	1276.94	916.361	1087.1	1147.33	134.573	162.08	120.417	755.556	948.205	880.492
LOC100047934	#N/A	1135.2	1566.27	1169.04	690.594	859.819	512.32	158.823	125.421	112.879	1190.11	1446.35	891.777	1907.22	2215.58	1424.22	957.057	1064.29	567.104	215.922	167.455	159.612	2103.67	2103.67	1808.61
COL11A1	12814	880.879	870.847	825.654	424.69	419.639	531.834	102.478	116.78	117.852	429.368	549.848	376.232	537.429	494.096	546.767	306.07	349.947	374.172	116.614	130.194	108.624	539.716	578.646	518.074
SEMA4B	20352	967.478	798.289	833.931	787.782	587.313	829.025	251.047	185.777	237.651	910.535	728.012	829.889	1067.98	1187.24	1275.11	655.959	619.905	633.466	203.586	221.317	240.606	724.223	601.916	727.085
LRP1	16971	357.83	331.523	402.784	577.044	766.577	629.352	140.041	126.402	119.584	1603.54	1277.88	1520.19	462.362	417.883	382.817	797.407	764.666	793.577	141.144	117.711	142.048	2122.51	1583.3	1711.02
TIMP2	21858	1613.45	1560.97	1469.05	1984.35	1903.07	1880.02	430.591	216.352	389.701	1808.61	1623.25	1872.55	1209	1210.13	1429.12	2002.98	1708.22	2247.74	307.728	364.45	518.919	1453.76	1517.19	1656.22
DKK3	50781	1137.39	866.348	1344.87	238.309	243.897	243.819	98.6069	95.8138	91.6635	369.989	342.145	389.05	603.35	473.096	459.541	405.105	412.602	397.349	96.408	102.347	99.8892	685.282	754.861	639.623
SLC9A3R1	26941	4178.12	3574.39	3671.02	2730.25	2253.15	3318.86	436.035	274.149	218.669	1708.22	1583.3	1702.86	2985.59	3326.34	3824.29	1760.88	2136.31	2473.36	620.584	682.47	376.144	2261.34	2097.77	2049.79
EG433229	433229	2959.88	3593.09	3689.8	3465.45	2621.52	3453.49	565.618	482.741	687.83	1719.31	1577.84	1732.34	4037.17	3519.75	3875.17	3078.38	2871.77	3326.34	497.82	565.448	632.629	2401.16	2196.42	2266.95
ACOT1	26897	963.399	888.897	977.791	1238.36	1199.66	1284.08	258.826	296.668	252.322	800.778	752.891	829.467	858.768	678.224	766.577	1176.09	909.235	1198.72	293.966	184.252	202.926	1018.6	876.645	1450.85
LOC226017	#N/A	1070.48	1049.31	1041.43	1232.71	962.928	1139.04	260.734	201.443	233.659	625.646	580.852	645.154	1541.45	1216.63	1077.07	1178.75	849.061	1299.38	259.064	226.231	252.195	895.61	624.311	857.72
ACPL2	235534	309.028	264.898	443.037	359.017	308.099	423.099	109.686	105.455	91.9451	927.839	754.861	912.505	334.898	304.066	439.935	290.218	318.34	374.732	119.182	94.3837	97.9108	476.376	422.138	558.062
GM347	241289	997.287	1141.96	1147.33	1179.58	1328.4	1003.74	251.568	172.292	217.125	1048.66	953.744	887.411	855.069	1240.32	1143.38	896.804	896.804	1150.02	134.791	342.796	181.397	757.957	837.419	870.847
IRS1	16367	981.513	969.379	824.078	1475.57	1909.58	1388.51	200.831	218.59	132.777	1555.53	1979.24	1643.51	1364.95	1500.54	1573.28	1962.78	1740.13	1623.25	376.035	227.319	146.42	2292.57	2648.57	2576.11
LOC100043822	100043822	358.829	377.98	466.776	300.439	339.475	343.894	95.227	109.714	116.575	415.006	332.235	533.08	563.169	555.457	570.824	454.318	344.571	427.199	107.606	110.002	99.2699	263.792	249.517	337.379
GPT2	108682	571.849	661.431	502.429	1272.65	1225.25	1211.07	120.358	144.877	201.332	489.687	430.293	574.63	828.704	702.067	848.389	1387.14	1137.39	1199.66	159.832	121.75	136.879	938.765	722.502	938.765
EPB4.1L3	13823	452.7	407.056	425.847	455.366	565.918	470.744	106.98	100.745	104.765	434.905	379.782	323.27	263.904	228.31	233.563	499.358	462.167	444.462	107.246	98.7409	101	516.009	545.717	488.637
LOC383576	#N/A	1248.13	1146.63	1275.11	418.573	548.547	469.723	131.646	134.778	156.633	416.282	550.57	715.536	1247.15	1097.91	1150.69	360.451	392.992	468.682	112.907	169.418	118.809	698.989	627.494	832.068
LOC406217	#N/A	1053.59	1295.68	1128.62	312.035	434.343	385.493	118.566	91.8359	93.551	274.043	374.651	541.917	891.777	915.389	1079.36	249.406	401.814	346.237	100.734	92.094	92.183	555.836	502.429	717.129
ZFP219	69890	1734.45	1870.46	1777.74	2151.68	2530.93	2080.15	561.055	714.939	396.354	1846.01	1956.21	1544.88	2009.14	2473.36	1974.33	2139.56	2648.57	2199.26	450.919	474.849	503.433	1671.76	1898.2	1493.8
APH1B	208117	453.601	514.259	522.566	390.756	394.973	450.109	133.03	114.956	143.068	440.363	397.805	420.873	519.769	574.405	705.069	398.375	483.265	477.046	143.359	169.825	140.789	352.948	488.51	413.707
ODZ4	23966	1390.8	1430	1369.08	423.012	976.035	514.095	102.68	104.444	119.724	1100.14	941.099	1046.98	2112.64	2103.67	1816.17	246.513	425.703	299.213	104.056	102.054	98.5331	737.118	629.159	634.443
PCBP4	59092	1464.11	1762.53	1580.51	2241.52	2359.7	2055.4	318.391	359.537	224.1	826.578	1012.49	730.905	1349.65	1611.86	1299.38	2119.35	2467.89	2154.61	196.216	286.086	255.264	972.485	1012.49	887.411
KIF5C	#N/A	1091.65	1017.22	996.725	777.573	628.868	794.408	100.806	136.284	91.5761	522.566	855.653	791.25	1080.92	900.79	822.11	272.512	345.277	412.369	92.55	127.673	113.031	642.754	586.294	520.646
D630004K10RIK	103210	519.076	422.595	547.998	653.253	809.428	613.616	93.5673	110.551	93.6472	228.846	248.54	360.714	436.691	311.299	422.138	513.032	434.905	497.498	87.1135	114.543	101.285	230.04	247.161	277.692
LRP12	239393	1507.13	1464.11	1601.58	1294.43	1382.83	1443.73	486.363	441.855	536.184	1488.03	1458.95	1586	1430	1574.54	1687.69	1320.61	1579.37	1347.55	411.868	661.877	613.616	1472.76	1366.8	1413.32
MAPK8IP1	19099	473.175	436.035	416.669	415.551	271.615	396.354	95.6598	112.636	115.962	384.813	403.071	348.014	570.129	616.101	676.709	432.149	395.624	515.848	140.468	105.795	105.152	345.762	374.968	394.383
CACNA2D1	12293	312.413	300.791	256.621	245.298	290.011	210.545	95.1259	93.0501	83.4586	275.973	250.931	224.919	245.197	247.669	233.73	263.792	216.508	184.586	94.3007	95.2645	94.1188	211.279	196.066	183.562
NLGN2	216856	367.454	400.055	329.406	501.961	498.694	445.606	124.075	171.746	133.282	795.803	691.414	539.134	351.394	564.119	474.235	405.347	442.3	333.588	110.783	157.923	119.654	676.311	602.178	548.715
LOC100048362	100048362	339.475	286.606	312.343	349.693	383.157	298.316	98.1695	112.601	93.6384	225.815	267.595	222.947	316.54	306.679	292.749	245.197	242.073	253.328	96.2223	103.793	88.0857	220.649	230.197	211.947
PEX11A	18631	316.192	273.826	283.07	214.317	208.734	222.367	90.0371	98.1257	104.759	221.59	205.898	237.43	280.915	238.814	257.059	226.157	232.306	245.197	110.062	106.493	108.272	222.098	243.152	270.379
ENO2	13807	236.441	216.902	187.809	340.354	395.324	405.616	98.2318	101.275	89.9169	357.606	445.606	352.186	398.787	430.735	350.008	319.099	281.707	203.657	92.7712	91.9847	88.7801	327.645	312.7	218.59
TPBG	21983	2871.77	3013.07	2946.54	543.733	600.298	759.436	127.577	217.859	270.639	1551.19	1248.13	1730.61	1390.8	1541.45	1941.95	494.5	572.684	571.849	138.736	151.173	219.333	1340.07	1234.84	1641.86
LOC381283	#N/A	758.357	632.003	519.599	1256.44	1042.71	1305.37	102.318	118.855	95.2015	318.696	358.936	303.379	707.768	677.315	555.244	1311.7	1210.13	942.879	95.7495	100.319	100.47	257.641	214.951	297.088
CD8B	#N/A	446.894	398.897	498.694	483.984	413.496	409.727	137.216	152.42	152.675	365.507	387.198	452.162	413.831	557.863	527.766	486.844	515.466	499.358	161.676	202.252	163.456	428.893	390.989	375.189
LOC100048721	100048721	367.333	469.173	295.334	586.294	722.502	532.372	110.139	103.924	110.187	909.235	1038.55	1236.57	744.464	996.285	818.314	945.136	1227.16	630.149	111.672	163.573	111.702	444.901	505.069	566.302
KLHL13	67455	726.77	813.947	988.3	1388.51	1176.95	1518.48	282.447	356.157	385.003	934.204	1022.6	1302.26	693.039	779.128	1101.57	925.84	1293.55	1636.57	181.494	214.994	378.566	1636.57	2053.25	2273.44
TMEM117	320709	1219.53	1099.3	1213.66	431.846	396.484	515.151	83.8598	101.977	89.7019	208.374	220.03	215.246	819.248	871.841	989.536	563.403	485.417	663.917	116.211	102.508	95.7046	379.706	303.746	396.484
SAMD14	217125	629.352	612.94	493.099	611.652	677.925	576.573	166.827	142.281	145.288	851.865	840.039	601.275	472.932	490.143	442.427	530.943	631.566	576.822	168.547	248.003	159.771	675.026	639.137	494.096
TRIM2	80890	496.139	435.112	395.324	633.686	673.93	610.901	142.001	180.311	159.856	401.064	395.748	382.554	606.057	559.026	481.299	571.56	594.006	527.46	162.738	192.247	141.918	382.554	419.073	341.031
D15BWG0759E	#N/A	236.002	248.502	263.268	187.842	229.179	269.741	97.7972	97.92	96.7926	301.16	278.853	338.712	173.217	203.557	218.558	181.573	226.694	215.641	89.8851	94.0194	96.7406	343.894	276.548	326.637
FLRT3	71436	451.756	602.407	342.006	848.389	1057.52	704.013	127.492	104.12	118.633	1193.52	1499.39	1461.13	1174.46	1271.63	1177.84	1424.22	1804.86	817.591	125.008	193.636	112.02	562.264	763.838	762.263
2410014A08RIK	109154	752.558	945.136	804.13	707.768	517.445	671.793	151.361	275.734	203.348	795.099	878.452	710.16	771.684	863.723	926.78	704.308	651.699	787.382	178.805	293.326	182.663	878.452	776.769	725.218
GPX8	#N/A	483.265	490.743	588.251	682.47	681.018	662.917	273.971	215.144	211.495	833.554	931.8	753.761	516.731	567.559	649.258	496.286	569.668	621.123	210.224	181.22	221.819	675.527	804.829	718.906
GAS1	14451	955.359	1094.6	1507.13	320.931	258.543	368.343	100.886	89.2432	122.243	636.011	606.694	982.22	1093.97	1467.83	2250.29	215.569	221.819	345.277	94.8002	95.8404	103.809	563.403	634.443	935.909
TMEM46	219134	280.596	341.788	501.153	309.028	370.919	398.375	107.752	112.472	101.511	378.566	423.835	606.694	304.924	284.328	518.204	265.739	204.588	350.095	98.7325	117.891	108.101	360.239	257.878	365.744
SEMA5B	20357	720.248	735.46	473.976	816.869	720.845	644.308	96.3999	112.02	100.542	364.16	309.596	320.823	280.143	350.474	205.042	584.394	869.176	496.916	88.6303	96.8874	118.435	220.071	229.667	234.041
HMGN3	94353	655.065	707.768	740.619	687.397	726.326	768.51	305.278	230.687	270.21	527.335	581.446	571.849	835.415	959.38	1005.46	630.785	599.179	639.623	235.914	274.043	241.798	719.208	923.582	781.612
GP38	#N/A	1034.92	1054.2	1475.57	701.479	889.459	1069.85	95.5807	90.6339	107.606	917.361	830.693	1066.2	1634.15	1877.86	2009.14	210.813	291.848	421.404	103.415	112.563	122.685	1347.55	1189.29	2048.06
SBK	#N/A	397.698	557.138	643.063	382.948	402.669	515.029	139.684	168.033	175.371	411.768	614.77	542.716	395.422	583.586	503.086	384.813	490.743	490.607	201.419	140.194	190.108	345.104	418.573	392.356
LRRN1	16979	311.299	273.119	432.909	259.664	275.146	422.138	104.199	103.768	112.958	642.225	554.436	522.774	1141.96	1514.2	2060.61	233.73	193.124	248.369	90.2576	103.351	99.0204	684.013	551.019	593.557
ACSL3	74205	1195.25	1132.89	1333.3	722.115	887.827	709.347	395.519	316.073	357.995	1069.06	1189.29	1129.12	1287.59	1209	1084.6	671.517	770.587	667.717	385.003	357.186	316.073	956.163	1041.43	944.263
SNX24	69226	406.254	475.765	537.429	307.951	269.741	315.882	114.766	101.914	145.723	453.447	349.837	456.272	505.889	460.093	510.158	357.995	244.273	323.481	115.622	94.7927	140.543	450.919	395.969	386.641
LGR4	107515	226.937	266.211	276.401	354.582	304.856	318.155	105.373	95.3838	91.83	245.252	194.078	270.801	267.163	322.549	307.139	274.691	263.429	258.592	107.474	111.039	116.477	295.459	281.218	322.288
TMEM184C	#N/A	222.41	293.053	299.66	355.954	301.253	403.3	129.188	98.6265	116.218	397.109	343.718	368.057	321.654	289.932	369.704	295.054	301.951	359.901	121.712	133.645	128.08	368.057	412.458	342.534
LOC381607	#N/A	245.75	255.437	196.406	269.393	252.041	223.194	103.434	91.5117	84.333	298.572	277.692	268.218	246.616	171.459	214.23	297.706	226.906	302.666	90.6385	99.9253	93.3443	310.296	219.222	248.038
TNS3	319939	3376.23	3054.19	2736.88	1872.55	2115.76	1893	389.789	465.771	443.037	827.55	997.287	1056.14	1507.83	1771.56	1839.35	1651.08	1673.42	1651.08	406.733	298.254	357.44	814.746	768.208	968.743
CKB	12709	3369.47	2332.03	2817.08	3334.6	3102.96	3748.77	525.049	706.551	525.049	2126.63	2335.44	2627.79	2520.63	2749.41	2681.77	2879.5	3538.88	3272.62	637.503	990.768	859.286	1800.44	2029.33	1621.96
ELOVL4	83603	387.298	324.389	493.85	356.157	253.461	392.704	98.6018	87.9438	120.184	291.565	264.368	412.112	285.251	272.994	239.886	238.267	208.957	219.492	111.574	91.1072	129.314	276.833	235.481	318.075
CLIP3	76686	189.649	200.039	218.171	265.619	301.779	327.224	107.341	104.918	99.3889	237.168	291.353	319.753	180.938	191.974	202.907	325.892	309.724	350.271	113.355	99.4898	109.351	255.809	292.791	290.146
ALCAM	11658	613.383	392.704	373.695	1279.03	1515.51	1418.32	119.033	196.579	125.752	327.143	490.476	416.164	406.733	390.252	312.762	1042.71	1247.15	1262.55	136.254	167.157	109.525	944.627	683.108	918.516
LOC380986	#N/A	243.334	240.048	236.105	317.5	165.508	300.377	101.977	100.319	94.4485	371.59	314.269	377.512	283.196	235.869	213.272	242.506	179.976	247.758	91.5828	101.527	104.166	293.793	282.183	270.573
LOC630567	630567	687.597	613.128	659.179	379.782	429.235	383.765	111.579	109.469	138.431	317.176	319.283	459.541	261.724	330.471	337.198	351.213	401.56	383.042	91.9158	90.917	100.358	219.784	291.17	307.535
FZD7	14369	559.85	624.996	737.792	279.524	315.101	338.712	105.028	118.899	104.609	578.464	573.86	677.925	496.714	551.256	781.409	323.792	293.104	342.34	176.26	98.6785	111.471	504.334	474.235	678.739
LOC677375	677375	334.011	357.105	194.925	356.916	601.275	192.969	90.0723	103.635	101.386	334.618	380.348	179.312	354.496	303.379	163.789	270.21	335.813	180.182	85.3972	90.3483	92.0267	252.277	341.717	213.153
SATB1	20230	492.799	474.373	497.498	314.269	274.092	294.038	112.334	124.835	140.395	359.714	348.106	347.126	563.86	536.362	448.402	252.487	309.361	303.874	148.551	160.155	141.212	318.391	291.751	266.655
NACC2	#N/A	1031.43	851.398	828.704	638.96	566.302	683.557	211.495	174.434	185.159	395.842	457.569	412.369	839.656	629.63	771.684	632.353	586.294	628.868	253.236	252.041	246.098	604.25	552.822	579.29
LPHN3	319387	198.508	195.918	201.276	274.888	299.092	325.183	109.977	124.182	116.467	239.342	241.347	277.37	293.26	223.545	254.879	281.754	274.848	305.943	123.907	125.658	116.974	245.75	250.499	264.612
ARNT2	11864	278.243	280.298	250.839	973.685	795.485	752.558	97.7848	112.406	102.706	463.373	300.213	362.048	407.831	516.577	540.578	1013.8	843.437	779.489	120.819	161.426	98.7135	764.296	548.218	618.927
2900060P06RIK	#N/A	220.396	271.769	323.872	361.95	310.68	366.729	85.7794	99.8094	101.157	405.779	531.834	578.646	219.854	162.836	249.288	178.357	314.962	366.19	104.868	103.656	99.1888	358.068	398.787	444.331
TCP11L1	320554	386.77	440.243	347.711	357.926	344.905	369.152	127.955	153.933	130.343	320.414	322.204	236.804	317.176	340.929	298.14	342.382	253.683	313.853	118.784	108.975	110.67	298.524	314.81	290.011
LMAN2L	214895	448.847	420.169	366.53	340.71	367.732	339.043	221.008	162.705	160.953	574.63	621.734	466.776	439.269	471.155	435.008	344.127	339.943	422.044	128.091	221.103	202.716	667.533	640.663	685.526
P2RY1	18441	671.793	628.868	1510.53	1106.9	1419.38	1255.52	116.218	109.146	121.913	235.582	257.918	357.606	350.18	346.9	755.181	1896.58	1461.13	1183.83	119.064	110.731	153.853	476.265	371.297	635.055
BC023892	212943	783.733	842.052	964.663	224.919	228.178	197.542	95.3465	96.408	98.4257	281.887	268.951	372.818	640.913	623.24	862.604	313.853	244.949	218.006	115.759	109.855	108.657	191.059	175.353	219.784
SESN3	75747	515.466	450.741	592.052	605.018	581.995	692.824	184.223	276.401	208.537	657.912	640.107	741.047	416.164	426.251	511.836	950.443	665.521	549.65	190.307	182.283	232.867	518.204	556.9	628.219
CERCAM	99151	392.59	376.395	464.427	243.425	194.435	264.995	96.6451	97.6052	122.598	318.34	204.348	333.398	227.255	281.653	383.042	230.197	184.552	250.499	116.204	109.53	107.666	297.706	315.409	437.838
RCN1	19672	808.072	889.879	937.225	699.51	643.338	697.481	305.13	349.536	340.433	563.169	663.691	833.931	1156.75	1428.04	1760.88	731.989	700.846	655.065	261.011	374.514	351.618	679.324	717.985	930.78

## Sheet: N.markers
symbol	geneid	Cs_A1	Cs_B1	Cs_C1	Cn_A3	Cn_B3	Cn_C3	Cb_A2	Cb_B2	Cb_C2	Cm_A4	Cm_B4	Cm_C4	Vs_A5	Vs_B5	Vs_C5	Vn_A7	Vn_B7	Vn_C7	Vb_A6	Vb_B6	Vb_C6	Vm_A8	Vm_B8	Vm_C8
GJE1	118446	133.351	123.87	150.113	4571.12	3252.45	4447.05	228.95	245.555	176.224	105.098	117.517	118.4	371.501	149.53	137.455	5327.92	4447.05	6752.96	418.25	361.224	207.845	143.995	150.521	124.075
EDNRB	13618	204.97	244.718	344.905	4467.65	5170.02	5370.41	313.638	518.71	451.034	145.56	178.381	208.083	542.716	355.261	361.407	4279.67	4333.16	4412.62	373.604	675.527	491.435	294.541	289.183	250.499
PLP1	18823	140.558	144.205	128.681	2938.44	3190.75	2610.22	163.382	163.937	93.9435	116.153	136.472	113.592	420.989	201.717	134.855	3886.45	3836.5	3619.48	266.389	372.274	179.607	118.906	166.065	107.798
VAT1L	#N/A	98.0466	95.5355	90.951	765.311	576.373	907.916	92.6647	104.377	98.1422	95.1703	105.907	112.886	95.5204	117.673	104.022	740.619	1132.89	1028.88	104.669	120.081	107.014	97.3126	92.8729	92.0022
ART3	109979	105.621	105.891	100.096	850.451	694.737	690.594	131.657	134.424	121.14	104.771	104.194	96.7104	136.284	102.836	107.416	880.879	779.856	739.095	144.537	135.468	133.748	102.28	104.996	92.9397
DHH	13363	89.3211	93.6897	101.89	2605.36	1727.95	2157.48	166.501	380.267	196.851	90.4606	89.9169	93.3443	137.934	125.263	103.172	2244.9	2228.57	2013.07	402.784	107.218	204.753	114.338	127.987	92.8842
DHRS2	71412	402.981	414.155	432.149	1970.75	2013.07	2473.36	134.532	134.335	142.785	101.883	115.8	107.307	299.021	205.46	226.392	1822.41	2253.15	2100.54	98.4619	153.142	124.983	104.215	133.151	90.7987
BCAS1	76960	179.087	254.259	262.147	3929.64	2484.7	3045.51	277.806	233.222	187.809	503.328	619.299	420.989	327.372	463.62	350.745	3025.2	2954.07	2846.11	129.777	331.092	149.485	350.008	405.347	233.514
UGT1A10	394430	97.6341	98.0466	97.7335	530.491	594.006	576.373	108.924	109.478	101.225	91.9158	89.4167	90.951	139.396	108.492	95.0275	531.834	582.476	521.017	120.397	131.253	125.02	93.6062	90.3687	98.0536
ITGB8	320910	159.832	133.063	145.013	1056.73	906.836	978.393	113.46	101.205	107.287	214.039	206.224	198.261	174.977	155.999	174.775	905.479	804.829	797.407	106.87	111.52	111.444	148.854	131.174	133.209
MMD2	75104	97.7052	102.111	135.899	1281.32	1601.58	1590.67	92.2825	229.87	102.21	91.4134	97.625	107.341	112.999	134.109	132.812	820.531	967.022	911.477	101.157	93.6336	89.8	110.977	91.9352	97.1588
B230343A10RIK	#N/A	98.4329	102.936	112.167	761.233	980.572	818.903	91.4413	124.121	95.6073	104.936	94.3442	105.093	214.527	144.331	144.009	1060.33	884.398	925.353	99.8063	101.995	100.397	103.306	110.787	106.438
FOXD3	15221	217.334	230.687	415.451	1452.52	2421.11	1898.2	210.988	373.991	273.548	212.279	239.164	285.653	365.668	207.214	168.263	1835.5	1956.21	1956.21	239.247	268.076	204.898	305.13	333.169	254.259
ADAM23	23792	243.543	213.933	262.021	1086.44	987.771	1034.14	102.823	134.995	90.0509	107.702	103.776	106.414	204.077	168.595	191.405	1019.68	873.887	1125.77	113.645	90.9957	90.6445	101.241	93.1008	112.397
MPZ	17528	168.894	199.614	141.602	2515.53	935.909	1700.62	146.813	108.332	120.478	88.6303	92.156	90.2576	281.218	119.54	109.419	3084.15	2196.42	2770.29	269.21	157.9	155.166	108.553	123.116	90.4527
MEGF9	230316	241.956	227.217	235.542	2023.07	1765.11	1533.57	260.242	203.438	261.331	269.926	245.6	277.744	345.488	210.678	238.267	2510.68	1967.07	1907.22	204.68	276.209	189.739	480.851	349.103	458.916
LOC100044150	100044150	104.706	104.108	109.99	610.115	428.587	605.018	93.8014	105.143	85.8366	112.999	138.963	120.697	114.111	110.621	93.3829	492.104	495.158	434.091	94.7519	108.473	98.3584	114.833	101.291	107.046
AATK	11302	2865.54	3242.33	2912.83	14336.1	14336.1	14336.1	2103.67	2599.72	1382.83	3139.8	3481.32	3102.96	3929.64	4220.63	3419.85	11987.8	17132	12693.3	1762.53	3404.23	1517.19	2857.91	2822.61	2515.53
KCNA2	16490	132.426	164.657	129.659	586.549	683.772	473.175	95.2166	137.921	112.563	106.63	95.865	92.294	130.075	152.967	133.041	710.581	528.184	467.068	100.478	108.996	91.8465	93.7053	110.013	102.354
MBP	17196	112.683	117.991	132.252	759.436	390.989	689.904	103.237	105.268	89.3816	88.9739	91.2247	89.8487	140.598	118.288	133.861	811.64	629.159	736.077	106.676	134.904	107.653	94.2046	94.7193	95.9812
CYP2J9	74519	193.86	172.664	200.039	666.738	679.324	657.65	115.494	142.117	109.134	112.441	109.575	111.593	240.122	162.488	187.712	1048.66	742.15	884.398	183.008	123.496	112.543	108.263	134.968	115.911
DEPDC7	211896	243.465	171.088	160.718	1808.61	1405.7	1864.04	287.151	301.065	166.625	300.171	399.221	235.443	275.803	353.738	333.931	1146.63	1846.01	1921.36	403.3	161.468	150.541	278.578	418.685	387.622
FABP7	12140	964.663	777.808	1133.47	8931.34	7791.76	8779.29	414.155	1062.17	608.349	541.182	1006.09	670.964	1002.86	550.326	475.765	6318.69	6318.69	6891.58	636.989	869.665	429.485	1579.37	2377.26	2082.36
SOSTDC1	66042	872.555	744.795	774.767	3836.5	3361.26	3593.09	220.437	316.54	162.544	163.203	182.788	230.996	749.009	635.055	1002.86	2719.3	2736.88	2599.72	306.856	228.846	150.394	214.071	146.987	178.087
SAMD5	320825	114.276	95.991	114.25	1347.55	1668.85	1258.68	110.484	224.958	192.989	293.591	332.766	319.895	142.249	138.011	121.192	1163.4	1246.24	1169.73	180.89	149.83	116.095	391.442	451.034	380.93
CDH19	227485	85.5303	93.7516	95.8812	729.947	881.358	524.36	96.9317	110.903	115.911	89.3554	90.3973	93.007	132.695	102.354	91.3728	1241.15	1221.21	865.174	204.379	131.242	98.9359	93.0733	96.6614	85.7213
TMC7	209760	181.168	193.237	238.043	764.666	916.361	761.233	214.803	236.141	229.003	198.097	200.588	246.299	161.751	220.855	158.375	678.739	664.529	638.65	160.807	211.697	252.36	157.964	195.326	197.82
INSC	233752	127.752	100.498	93.1872	416.978	474.235	482.93	103.686	104.813	89.2065	82.599	86.5532	89.5743	149.258	124.759	125.474	371.59	421.404	493.29	108.531	112.279	89.2538	91.1426	85.2968	104.037
MEGF10	70417	130.76	131.145	153.709	650.431	783.339	899.199	101.617	102.508	101.865	180.072	166.25	203.691	204.929	223.394	247.707	711.695	634.708	613.972	99.8223	117.925	99.5881	190.073	187.966	190.968
AFAP1L2	226250	150.911	197.973	150.821	559.652	868.822	483.111	115.055	95.3186	113.337	114.299	144.112	103.754	103.733	103.479	128.246	787.382	749.84	566.71	117.314	106.568	105.967	128.039	134.353	99.407
STARD13	243362	311.557	265.619	258.693	1052.94	1228.07	1036.16	306.194	358.474	325.892	152.177	160.363	141.401	178.582	203.796	228.846	1483.2	1584.69	1186.2	425.575	411.502	354.134	164.288	217.894	198.814
PDLIM4	30794	275.397	306.394	274.092	728.922	1043.27	788.995	149.224	127.277	103.056	175.764	259.181	237.113	216.047	227.713	177.685	1105.72	992.389	895.61	102.171	168.91	120.844	155.747	158.09	179.194
NTNG1	80883	112.455	94.8308	107.069	270.048	327.287	300.878	100.028	95.4032	98.1385	101.65	98.8534	109.99	104.108	91.3249	104.641	335.813	267.302	333.8	109.977	99.7075	93.826	108.277	113.473	105.76
LGI4	243914	93.7467	96.8985	98.3408	316.192	289.394	282.749	98.4166	99.7625	90.4443	87.9796	86.7884	89.9169	101.377	91.0962	90.7158	429.835	311.654	338.712	106.752	120.733	90.3213	92.5613	89.862	84.2211
A730054J21RIK	320862	159.938	158.375	202.813	579.489	615.74	685.282	86.6863	103.942	89.5743	230.082	145.25	226.906	102.508	120.877	110.468	533.692	534.767	871.394	139.37	102.872	87.3856	143.113	150.708	172.648
MICAL1	171580	117.967	143.359	153.454	481.448	535.715	502.429	155.825	188.89	157.397	140.942	158.719	142.769	103.67	102.964	94.6587	523.081	695.705	593.72	135.034	146.438	208.477	142.219	174.993	151.954
ABCA8A	217258	80.8506	90.9668	86.8491	369.989	292.573	360.862	94.5349	102.192	97.6967	86.0731	84.2211	85.8366	90.3687	92.3569	85.3544	314.705	279.668	233.807	93.3079	90.7987	94.2278	87.052	86.1095	80.6865
HSPA12A	73442	160.788	168.344	148.604	1000.42	1018.6	874.508	130.013	132.176	128.05	307.599	384.89	380.539	359.352	298.082	330.471	1056.73	1226.18	1091.65	140.381	193.442	125.421	248.279	302.353	267.595
GAS7	14457	290.699	248.457	233.807	2912.83	2817.08	2401.16	281.291	511.04	210.455	333.739	260.333	235.792	1059.64	838.308	545.717	3369.47	2883.61	2631.58	710.793	322.079	206.696	278.351	398.299	342.722
D130004I16RIK	#N/A	92.5664	82.3944	91.6322	240.924	351.394	238.645	94.5976	97.5994	87.3856	90.5315	87.3355	85.7023	91.4782	85.5768	87.5901	492.42	354.202	237.359	97.184	107.72	89.9396	93.2255	83.8854	82.3118
RAP2A	76108	240.208	218.323	185.9	1182.11	1028.14	1250.54	279.592	307.801	401.258	255.437	287.865	284.142	260.242	263.268	254.259	993.321	952.406	1074.42	436.691	280.024	359.714	259.612	231.263	319.661
FARP2	227377	157.151	189.395	147.757	658.247	864.668	796.117	147.24	254.826	156.294	146.492	178.791	178.558	233.563	135.363	183.602	700.465	710.581	727.395	247.062	302.416	176.798	184.851	202.878	167.266
KCNJ10	16513	136.758	115.094	130.676	517.894	348.191	408.35	134.747	121.865	102.836	95.5155	99.6409	93.7516	162.608	123.803	121.542	498.512	388.297	478.372	100.502	113.126	107.252	95.6598	95.6527	96.1565
UGT1A6A	94284	95.1202	95.2803	89.7359	308.963	247.812	294.326	94.3991	102.125	101.205	91.8819	92.4786	90.0965	96.8924	95.5265	92.3726	249.959	234.54	231.788	108.385	94.7091	101.116	89.99	90.5869	98.0063
LOC100046035	100046035	101.601	107.884	111.433	256.175	342.45	246.888	99.0035	96.2576	97.2701	89.8199	90.3281	99.7675	102.576	99.3785	101.89	414.155	350.095	305.331	115.699	96.0862	86.4989	94.8258	93.7922	94.9608
CTNNAL1	54366	452.461	504.507	423.343	1861.72	1517.19	1528.3	143.052	105.255	94.0656	216.677	270.639	263.746	584.205	531.834	486.039	1234.84	1540.29	1249.23	105.541	249.288	88.4465	285.653	286.086	288.675
CAPN5	12337	277.92	237.651	286.052	1346.21	1577.84	1613.45	246.465	348.191	190.85	226.392	218.59	206.19	240.52	273.168	291.4	1442.51	1323.08	1182.11	314.419	559.478	247.413	265.048	324.453	328.534
NPR3	18162	110.124	102.692	109.485	548.715	872.218	661.877	145.155	165.753	134.791	89.8337	88.8714	93.9487	142.958	163.062	212.714	509.293	590.988	563.86	240.57	201.276	241.909	91.2527	94.178	91.0199
SCAMP5	56807	334.82	330.608	298.316	1335.25	1270.8	1080.25	221.317	365.018	243.089	415.451	487.296	350.18	513.398	384.06	387.968	1106.9	1310.71	1088.67	264.551	215.69	210.627	451.034	441.651	376.232
SORBS1	20411	135.363	124.781	130.097	685.03	716.204	554.641	197.067	263.977	208.374	149.955	173.638	135.318	194.871	208.447	161.016	783.339	676.311	614.919	256.175	241.586	214.38	211.539	228.786	165.644
ACSS1	68738	94.8698	98.0674	95.0552	1172.53	1046.98	1037.88	312.46	234.726	194.493	202.152	181.555	213.595	170.562	200.588	115.543	881.358	1154.98	827.55	368.244	396.484	283.07	147.284	155.221	188.062
EGFL8	81701	91.5932	92.5075	98.4619	759.794	653.253	912.505	295.969	277.513	228.178	92.144	100.628	93.4686	120.066	94.7743	91.865	1177.84	942.038	1217.65	304.206	321.241	261.724	100.542	103.593	94.7566
FAM134B	#N/A	888.354	745.583	748.695	3419.85	3548.27	3252.45	328.185	392.59	326.87	542.252	737.792	537.229	1590.67	1520.19	1615.2	4004.27	4084.24	3345.02	262.246	691.724	285.78	1179.58	991.781	1045.16
METRN	70083	452.8	283.343	420.169	1087.68	1032.22	1711.02	118.982	140.772	168.989	154.417	178.209	224.756	350.656	415.777	500.35	1006.09	1401.66	1267.79	137.587	104.169	128.206	135.864	184.959	173.33
BZW2	66912	404.879	434.905	428.475	1269.77	1202.95	1286.27	418.132	461.301	406.733	540.283	602.178	584.394	438.767	494.979	496.916	1281.32	1439.24	1408.62	284.413	246.465	336.448	474.373	447.266	487.43
IGSF11	207683	233.73	238.229	253.847	833.931	844.425	801.183	113.617	139.731	109.787	111.492	112.617	112.148	229.514	215.69	221.163	761.526	772.522	655.511	103.837	125.484	110.201	330.23	273.042	300.585
DAG1	13138	788.709	765.311	838.308	2566	1872.55	1995.09	678.224	642.544	769.496	670.964	778.122	751.197	872.218	763.502	911.892	2297.01	1779.34	2122.51	696.854	669.398	743.496	756.008	749.84	818.314
AKR1B8	14187	101.392	94.9659	93.035	324.515	215.69	383.338	99.7675	95.006	93.7293	99.1474	93.3922	101.906	90.7562	97.0975	99.9136	314.269	227.537	326.288	86.7184	95.0793	90.8089	103.263	90.6385	110.971
CNP	12799	174.185	162.169	189.904	1060.33	654.166	1098.5	153.823	155.516	181.145	118.881	128.193	131.082	289.394	265.619	337.473	1212.76	878.452	1257.28	146.206	178.338	179.009	135.846	121.554	145.597
UGT1A6B	394435	88.2783	91.7424	86.4377	311.299	198.335	271.862	85.4923	91.2307	90.9957	89.7293	91.0843	78.6432	93.3961	86.9678	88.6107	236.037	208.477	253.8	103.985	94.4569	91.4134	94.5048	89.0787	90.6902
SPECC1	432572	197.862	206.865	172.775	736.077	633.686	600.298	134.036	116.763	128.636	250.179	233.889	263.083	317.723	273.444	229.096	881.786	695.022	739.499	137.474	118.478	112.124	152.04	160.309	161.409
LOC100047870	100047870	145.737	157.432	182.336	469.565	475.442	529.821	132.384	117.459	205.125	135.483	131.657	132.955	122.528	134.982	111.059	381.793	397.59	384.614	101.225	127.156	119.976	112.256	103.076	129.514
NCAM1	17967	98.3949	97.0119	100.141	270.165	220.526	257.17	98.0716	106.525	95.1259	103.072	100.302	103.162	101.717	94.2679	92.0316	295.868	334.534	262.246	105.549	111.646	93.1714	114.093	117.925	118.756
ANK3	11735	181.605	174.488	171.088	427.606	343.894	348.645	100.872	106.126	90.4898	130.002	134.955	130.194	183.821	185.338	185.928	475.442	433.734	416.282	118.211	119.151	95.2362	101.834	106.228	101.534
PTPRZ1	19283	232.262	232.824	212.573	493.968	603.072	461.301	92.9931	121.429	94.3064	89.6579	95.3945	91.4574	252.487	233.771	170.562	555.244	714.297	526.978	95.6571	109.932	90.4777	91.2008	111.975	87.6542
ZEB2	24136	94.0295	105.764	102.28	2004.73	2754	2221.24	239.642	309.788	313.853	1097.33	938.765	1097.33	288.373	168.399	119.425	2484.7	2741.39	2586.56	406.557	367.333	217.859	541.555	577.536	552.566
GRIK2	14806	97.0382	101.505	93.8957	236.879	278.911	219.751	106.493	102.054	101.43	103.403	99.7833	100.761	112.047	101.505	105.773	249.467	204.175	206.256	96.6884	108.515	97.2889	98.6658	95.6073	101.153
ITGB3	16416	82.599	94.9321	85.6173	208.996	191.002	244.427	90.4144	97.1925	87.9232	90.8254	88.3386	98.2986	93.4808	101.761	105.109	243.376	209.121	208.278	95.3356	90.5496	104.724	91.9975	89.6311	90.1326
CUEDC2	67116	1111.17	1190.87	1111.79	3916.97	2147.62	3095.9	1019.68	1013.8	865.665	940.211	882.169	933.652	887.411	780.227	880.879	3030.73	2926.98	2938.44	844.425	868.18	906.836	1052.36	1116.72	951.38
PLEKHA4	69217	459.993	515.466	236.546	1947.9	2063.5	1167.82	100.502	272.289	107.028	135.634	132.396	107.121	311.811	315.184	148.332	1498.15	1743.69	926.24	184.876	299.213	102.854	109.286	134.413	108.624
COL23A1	237759	101.039	96.9648	92.2108	465.258	453.998	394.886	100.261	111.444	111.351	174.093	144.346	142.469	105.158	97.9263	93.0812	618.109	416.85	343.833	104.776	164.084	102.393	191.9	164.144	171.438
ERBB3	13867	510.472	400.731	459.229	1367.98	1064.29	1240.32	111.303	118.873	92.6133	87.3355	81.7682	92.3673	507.578	595.782	458.3	1618.68	1257.28	1332	97.7535	98.9784	92.3673	82.3118	90.6082	100.011
AW049604	106014	147.124	173.704	182.788	677.925	665.253	762.841	84.2517	97.0289	106.444	163.011	135.959	173.3	211.729	292.394	231.037	519.89	712.709	639.892	172.017	171.062	97.72	152.516	133.835	169.724
GAS2L3	237436	92.7764	97.211	105.195	944.627	592.688	842.989	117.794	164.773	188.09	206.334	226.392	321.564	133.269	116.364	137.037	692.824	569.264	900.233	147.86	158.245	136.472	242.325	313.574	321.87
B230114H05RIK	#N/A	489.27	411.642	345.277	1753.88	1306.41	1414.46	373.903	423.099	313.113	545.717	457.397	471.155	746.723	543.883	638.96	1675.81	1594.38	1742.22	378.881	672.418	298.187	635.338	636.989	639.137
MRPL19	56284	130.002	139.276	133.816	425.847	598.919	518.591	169.102	242.325	143.899	155.09	162.367	138.287	194.054	187.466	203.289	608.058	705.948	547.601	96.8334	165.43	165.995	219.982	220.248	244.139
S100A6	20200	315.807	245.521	315.409	542.252	615.375	672.685	162	99.1789	127.709	113.707	100.119	103.91	179.939	127.056	217.894	813.059	686.149	1037.44	108.316	183.934	145.322	120.868	133.144	117.399
TEAD1	21676	278.066	238.679	264.071	835.415	739.499	693.996	226.349	212.674	169.503	328.786	284.632	328.657	367.571	292.064	290.847	861.255	689.904	841.007	247.618	148.551	188.253	344.034	333.931	402.044
PROS1	19128	114.476	161.751	142.435	1696.07	1823.89	1453.76	786.691	653.526	784.1	719.208	718.906	758.357	381.793	341.788	338.2	1886.82	1760.88	1826.22	773.663	763.502	848.389	633.686	606.057	667.902
FBXO7	69754	110.751	121.026	114.087	265.167	254.057	312.413	112.617	119.058	91.9847	95.3313	100.397	98.7961	130.869	119.41	124.213	401.678	262.766	335.663	128.182	113.87	149.627	105.84	96.488	95.6333
LOC100045981	100045981	333.588	408.726	507.458	848.001	906.05	1160.21	173.397	231.32	146.228	258.508	306.518	304.987	357.995	372.818	427.749	871.394	884.869	967.478	174.681	185.871	146.924	175.353	216.641	216.458
2610024B07RIK	269987	157.763	143.481	166.75	416.016	433.634	409.937	132.51	132.44	133.338	173.185	174.271	183.795	212.026	175.83	175.639	440.363	372.818	430.191	143.899	122.933	134.049	223.254	216.278	219.944
D930046G03RIK	#N/A	113.098	103.675	104.115	332.699	417.059	378.674	134.18	120.763	94.178	117.53	136.552	119.939	126.829	105.549	119.695	368.244	325.811	349.837	172.796	195.196	116.492	125.591	114.299	111.126
A830059I20RIK	58238	131.094	132.51	121.995	512.154	521.923	469.439	163.533	254.938	254.609	97.7919	108.595	122.752	117.958	126.448	128.133	529.821	418.573	484.719	100.865	105.152	169.503	243.19	226.674	206.334
WBSCR17	212996	99.9975	105.79	106.126	465.12	379.782	401.56	100.984	94.2924	101.94	187.582	193.991	231.466	119.591	117.339	112.268	401.814	518.074	394.973	119.54	104.552	104.415	119.13	117.314	132.726
KCNA6	16494	341.717	448.68	566.302	2112.64	2741.39	2484.7	987.269	1292.04	1133.47	710.793	882.449	871.841	381.653	289.447	205.624	2912.83	3152.92	2780.85	928.49	992.389	973.685	474.731	574.405	632.353
MMP17	23948	92.9599	94.4874	82.599	186.23	193.093	218.558	98.5701	98.7135	114.124	103.197	101.914	104.641	102.787	92.8842	100.125	196.476	224.417	193.408	107.194	108.783	111.154	96.015	98.1422	95.1703
SHC4	271849	677.022	806.089	795.099	1496.88	1473.87	1315.2	179.139	311.423	145.264	127.72	145.139	117.044	579.967	626.206	504.507	1839.35	1992.08	1726.92	108.509	268.699	131.769	282.595	371.191	256.483
SEMA3B	20347	182.283	177.442	186.315	375.475	401.258	362.779	105.664	115.962	103.374	100.397	98.246	100.002	222.501	204.055	216.543	436.148	506.313	395.748	108.57	113.371	103.112	98.2537	102.75	99.5064
5430435G22RIK	226421	112.133	101.356	114.101	383.338	320.555	317.115	127.619	89.6883	90.6598	109.945	97.7382	105.186	178.791	96.9317	98.5802	414.571	441.098	496.286	195.891	97.6723	91.9404	114.911	91.3678	114.87
DBI	13167	2631.58	2560.55	2658.45	4601.16	4412.62	4846.55	1597.77	1501.7	1685.84	1498.15	1507.83	1777.74	2097.77	2224.37	2510.68	4264.89	4689.55	4543.75	1372.88	1360.99	1366.8	1694.35	1428.04	1546.92
KANK4	#N/A	160.519	144.408	153.366	565.02	565.448	594.908	223.545	195.025	210.182	170.224	174.601	195.047	155.999	150.488	230.117	491.249	524.689	531.594	190.148	163.718	164.672	299.35	291.093	307.375
GALNT6	207839	84.0786	88.4465	93.0554	276.928	188.629	246.343	96.9011	94.0924	105.39	90.4081	91.8465	92.9503	107.745	96.6451	109.27	216.352	290.272	250.33	89.4495	118.045	107.271	90.5759	93.2858	93.7516
CDH20	23836	88.863	92.144	88.6303	251.41	162.08	224.186	95.0658	101.606	95.1985	90.7987	87.7418	84.5503	85.9287	85.1328	87.9557	217.084	274.043	195.025	85.1041	98.1257	94.5824	89.471	87.3355	89.6646
D5ERTD505E	52485	103.879	97.0241	91.7113	334.44	426.947	199.847	126.01	119.818	118.236	94.7566	94.5568	95.0161	101.9	90.2576	92.7871	321.165	240.122	410.302	96.6498	96.4453	118.56	101.606	97.3481	92.812
CHST3	53374	109.869	102.13	121.324	216.936	312.532	314.048	102.745	137.097	128.705	95.304	94.8002	95.4874	94.8808	94.704	99.5064	246.256	266.941	288.247	125.137	98.2414	124.476	106.574	96.2533	93.7429
RASA3	19414	111.914	138.626	127.524	941.578	1083.89	1083.14	496.916	516.911	522.236	307.302	279.043	302.146	178.277	140.723	142.923	1028.14	1021.49	1028.14	522.954	602.407	582.751	191.205	203.482	201.372
S100A4	20198	88.9307	98.8889	96.63	200.745	174.11	250.988	90.6082	97.245	95.499	97.245	96.6884	95.208	101.101	99.5162	97.072	222.732	184.828	302.353	92.8366	104.949	108.158	103.242	95.4824	112.124
SLC35F1	215085	156.949	161.585	163.456	258.784	437.329	344.742	96.8874	118.577	93.9313	91.7149	107.615	119.476	131.413	147.544	167.437	374.732	437.545	403.655	91.7541	91.6568	89.5995	102.936	93.3685	103.568
LOC100045228	100045228	149.143	127.422	171.171	501.806	416.978	400.279	102.881	122.617	113.707	147.456	142.923	158.823	112.077	130.892	163.511	305.866	308.232	452.162	110.723	96.1054	115.253	160.557	156.981	198.335
4930579E17RIK	75847	101.666	108.095	107.328	230.197	187.995	224.919	107.188	103.514	100.011	120.763	105.436	118.655	115.343	109.893	123.374	207.96	225.766	222.614	98.5652	114.625	102.347	109.345	114.777	111.771
SH3GL3	20408	98.2948	89.1427	103.609	248.694	193.936	257.878	100.749	100.062	105.186	109.666	114.423	128.705	98.7589	106.892	99.7675	272.684	209.928	246.138	104.552	94.5284	100.675	113.919	128.371	108.165
SLITRK1	76965	90.7608	93.9639	89.6961	311.959	249.083	332.311	96.6041	99.8954	97.8136	98.263	122.329	124.707	106.288	91.4504	105.881	236.842	187.264	206.571	99.7722	101.285	93.9205	98.3815	91.9511	96.1485
PGM5	226041	948.205	597.936	603.072	112.013	92.0316	108.224	730.905	668.372	549.65	360.945	362.292	359.425	423.708	315.882	300.642	97.0552	94.5663	110.541	715.807	523.081	556.627	346.99	264.071	275.673
NHSL1	215819	812.776	1006.09	929.532	293.737	247.208	281.961	795.803	686.437	769.875	754.18	847.215	644.584	1106.3	1106.9	1087.68	236.07	188.322	263.942	720.557	752.558	952.406	1085.49	1028.88	893.038
LOC100046963	100046963	730.596	452.7	610.901	99.7317	89.9697	101.403	553.701	485.735	469.439	333.235	297.706	364.933	326.214	225.815	316.822	99.6937	89.8919	97.7697	397.805	448.568	486.199	275.803	218.622	229.667
ETL4	208618	803.725	788.332	738.454	141.007	109.686	127.661	798.923	469.173	577.044	1002.22	762.841	789.866	1140.91	1253.56	1312.97	194.031	214.292	229.179	1057.52	748.695	782.681	1210.13	1295.68	1175.1
ZHX3	320799	527.631	413.295	424.174	134.109	133.899	164.144	365.83	354.35	442.829	373.004	320.555	352.733	615.74	651.699	435.112	156.532	159.462	160.121	354.202	438.352	485.417	314.81	378.997	403.482
EBF3	13593	213.821	240.363	286.409	108.137	97.942	115.991	218.865	227.996	238.448	299.35	280.143	253.284	373.318	392.143	257.878	100.203	96.8334	95.8942	274.943	423.437	288.55	243.897	224.694	229.096
2900016G23RIK	78659	1822.41	1182.82	1441.47	612.124	377.325	564.692	2374.95	1989.33	1310.71	1526.98	1125.77	1391.59	2241.52	1601.58	1592.23	467.553	218.832	592.296	2938.44	2109.88	2004.73	1122.21	1088.67	1198.72
FAM131A	#N/A	314.486	312.291	269.53	146.393	158.295	158.962	572.274	741.047	906.452	360.451	348.014	317.885	310.489	398.584	334.273	126.39	123.595	156.191	415.006	524.503	777.808	490.607	669.983	463.011
TOX3	244579	882.169	754.18	1052.36	113.031	91.6635	94.6706	194.736	187.653	301.196	204.279	188.678	224.991	390.381	466.076	581.446	89.2846	106.444	103.635	326.87	204.861	245.521	256.381	194.435	265.111
HSPB8	80888	1679.73	1175.1	1173.82	313.853	221.46	243.759	1581.96	2002.98	1651.08	972.036	725.616	917.361	2145.55	2100.54	1292.04	327.917	441.38	418.132	2035.89	1970.75	1531.77	1477.22	1294.43	1421.75
SPARCL1	13602	3465.45	3221.51	2115.76	1024.23	553.364	1103.22	2833.3	3689.8	3678.71	2435.7	2145.55	1927.01	2203.27	2335.44	1995.09	1179.58	1186.2	996.725	3147.95	4300.01	3824.29	2985.59	2973.16	2391.7
MYO6	17920	1756.06	1323.08	1265.39	713.639	747.592	774.767	1381.81	1375.66	1272.65	1868.3	2092.08	1779.34	2183.06	2566	2290.17	675.026	663.691	692.607	1234.84	1446.35	1319.59	1496.88	1827.29	1562.53
TMEM51	214359	846.968	722.115	887.827	191.974	115.878	159.304	866.728	802.699	1052.36	487.592	510.472	488.843	1303.15	981.849	935.909	243.19	184.586	310.296	1022.6	891.354	1034.92	722.115	720.248	708.094
MLLT4	17356	810.872	775.197	654.384	357.105	325.892	257.059	1329.29	1215.93	1194.37	826.026	797	557.701	1124.31	1066.73	825.654	283.263	263.327	248.038	1453.76	1185.27	1158.52	696.024	682.75	554.261

[truncated: 1 more sheets: S.markers]
